# Supplementary material for: Genome-wide profiling of active enhancers in colorectal cancer
Source: Research Square preprint supplement (doi:10.21203/rs.3.rs-119156/v1), 2020-12-10
Supplement: Supplementary file 1 [file f07a5d3dea6c78869a5c5106.xlsx]

## Sheet: Tab1 Patient tissue information
Table 1 Information of CRC patient tissues
Patients clinical information					represents the patient without TNM stage information
Sample	Gender	Age	T stage	N stage	M stage	TNM stage	Clinical diagnosis	Pathological diagnosis
1	male	70	T4	N2	M0	T4aN2bM0	Rectal sigmoid junctional tumor	Poorly differentiated rectal adenocarcinoma
2	female	69	T4	N0	M0	T4N0M0	Ascending colon malignancy	Poorly differentiated adenocarcinoma
3	male	53	T3	N1	M0	T3N1cM0	Sigmoid colon tumor	Moderately differentiated sigmoid colon adenocarcinoma
4	male	59	No data	No data	No data	No data	Sigmoid colon tumor	Poorly differentiated sigmoid colon adenocarcinoma
5	male	77	T3	N0	M0	T3N0M0	Sigmoid malignancy	Moderately differentiated colon adenocarcinoma
6	female	52	T3	N0	M0	T3N0M0	Colon tumor	Moderately differentiated colon adenocarcinoma
7	female	65	T4	N0	M0	T4N0M0	Sigmoid colon tumor	Moderately differentiated sigmoid colon adenocarcinoma
8	female	59	No data	No data	No data	No data	Rectal tumor	Moderately differentiated rectal adenocarcinoma
9	female	65	No data	No data	No data	No data	Colon tumor	Moderately differentiated descending colon adenocarcinoma
10	female	62	No data	No data	No data	No data	Colon tumor	Moderately differentiated Adenocarcinoma of hepatic flexure of colon
16	male	67	No data	No data	No data	No data	Colonic malignancy	Moderately differentiated adenocarcinoma of splenic flexure of colon
17	female	73	T3	N1	M0	T3N1cM0	Rectal tumor	Moderately differentiated rectal adenocarcinoma
18	female	54	T3	N0	M0	T3N0M0	Multiple primary colorectal cancer	Poorly differentiated colon adenocarcinoma
19	male	76	T4	N0	M0	T4N0M0	Ascending colon malignancy	Moderately differentiated ascending colon adenocarcinoma
20	male	59	T3	N0	M0	T3N0M0	Rectal tumor	Moderately differentiated sigmoid colon adenocarcinoma
21	male	60	T3	N1	Mx	T3N1Mx	Rectal tumor	Moderately differentiated rectal adenocarcinoma
22	male	49	T3	N2	M1	T3N2M1	Rectal malignancy	Poorly differentiated adenocarcinoma in the upper of dentate line
23	male	64	T3	N0	M0	T3N0M0	Rectal malignancy	Poorly differentiated Rectal tubular adenocarcinoma
24	male	49	T3	N0	Mx	T3N0Mx	Rectal malignancy	Moderately differentiated rectal adenocarcinoma
26	male	27	T3	N2	M0	T3N2M0	Rectal tumor	Moderately differentiated rectal adenocarcinoma
27	male	73	T3	N0	M0	T3N0M0	Rectal tumor	Poorly differentiated rectal adenocarcinoma
28	female	80	No data	No data	No data	No data	Malignancy in hepatic flexure	Moderately differentiated colon adenocarcinoma
29	female	62	T3	N0	M0	T3N0M0	Ascending colon tumor	Moderately differentiated ascending colon adenocarcinoma
30	male	46	T4	N0	M0	T4N0M0	Colon tumor	Moderately differentiated adenocarcinoma of left colon
31	male	73	T3	N1	M0	T3N1M0	Rectal tumor	Moderately differentiated rectal adenocarcinoma
32	female	54	No data	No data	No data	No data	Rectal malignancy	Moderately differentiated rectal adenocarcinoma
33	male	30	T4	N2	Mx	T4N2Mx	Rectal tumor	Poorly differentiated adenocarcinoma of rectum
34	male	55	T4	N1	Mx	T4N1Mx	Ascending colon tumor	Mucinous adenocarcinoma of ascending colon
35	female	70	T2	N2	M0	T2N2M0	Rectal tumor	Highly differentiated rectal adenocarcinoma
36	male	79	T2	N0	M0	T2N0M0	Colon tumor	Moderately differentiated colon adenocarcinoma
37	female	67	T3	N1	M0	T3N1cM0	Sigmoid colon tumor	Poorly differentiated sigmoid adenocarcinoma
38	Male	61	T3	N0	Mx	T3N0Mx	Malignant tumor of colon	Poorly differentiated colon adenocarcinoma
39	female	73	T3	N0	M0	T3N0M0	Colon tumor	Highly differentiated adenocarcinoma of colon
40	female	44	No data	No data	No data	No data	Colon tumor	Moderately differentiated colonic adenocarcinoma
41	Male	57	T3	N0	M0	T3N0M0	Colon tumor	Moderately differentiated colon adenocarcinoma
42	Male	71	T3	N1	M0	T3N1M0	Colon tumor	Moderately differentiated colon adenocarcinoma
43	Male	70	0	0	0	No data	Rectal neoplasms	Moderately differentiated rectal tubular adenocarcinoma
44	female	67	T3	N0	M0	T3N0M0	Malignant tumor of colon	Moderately differentiated colon adenocarcinoma
45	Male	67	No data	No data	No data	No data	Rectal neoplasms	Poorly differentiated adenocarcinoma of rectum
46	Male	62	T3	N0	M0	T3N0M0	Rectal neoplasms	Moderately differentiated rectal adenocarcinoma
47	Male	68	T4	N1	M0	T4N1cM0	Colon tumor	Moderately differentiated transverse colon adenocarcinoma
48	Male	77	T4	N0	M0	T4N0M0	Colon tumor	Moderately differentiated colon adenocarcinoma
49	female	69	T3	N0	Mx	T3N0Mx	Colon tumor	Moderately differentiated colon adenocarcinoma
50	Male	55	T3	N0	M0	T3N0M0	Rectal neoplasms	Moderately differentiated rectal adenocarcinoma
51	female	79	T3	N1	Mx	T3N1Mx	Malignant tumor of colon	Moderately differentiated colon adenocarcinoma
52	Male	65	No data	No data	No data	No data	Rectal neoplasms	Moderately differentiated rectal adenocarcinoma
53	Male	64	T4	N1	M0	T4aN1M0	Rectal malignant tumor	Moderately differentiated rectal adenocarcinoma
54	Male	71	No data	No data	No data	No data	Rectal neoplasms	Moderately differentiated rectal chorionic tubular adenocarcinoma
55	female	50	T3	N0	Mx	T3N0Mx	Rectal malignant tumor	Moderately differentiated rectal adenocarcinoma
56	female	49	T4	N2	M0	T4N2M0	Rectal tumor	Moderately differentiated rectal adenocarcinoma
57	Male	77	T3	N0	Mx	T3N0Mx	Colon tumor	Poorly differentiated adenocarcinoma
58	female	77	T3	N0	Mx	T3N0Mx	Rectal tumor	Moderately differentiated rectal tubular adenocarcinoma
59	Male	47	No data	No data	No data	No data	Rectal neoplasms	Moderately differentiated rectal adenocarcinoma
60	Male	69	No data	No data	No data	No data	Rectal malignant tumor	Moderately differentiated rectal tubular adenocarcinoma
61	Male	50	No data	No data	No data	No data	Transverse colon tumor	Moderately differentiated transverse adenocarcinoma
62	Male	68	T4	N0	M0	T4bN0M0	Colon tumor	Moderately differentiated adenocarcinoma
63	Male	71	No data	No data	No data	No data	Malignant tumor of descending colon	Moderately differentiated descending colon adenocarcinoma
64	Male	61	T3	N0	M0	T3N0M0	Sigmoid colon tumor	Moderately differentiated adenocarcinoma of colon, Straight junction biopsyadenocarcinoma
65	Male	81	T3	N1	Mx	T3N1Mx	Rectal tumor	Moderately differentiated rectal adenocarcinoma
66	Male	46	T3	N1	Mx	T3N1cMx	Rectal neoplasms	Moderately differentiated adenocarcinoma
67	Male	60	T2	N0	M0	T2-3N0M0	Rectal malignant tumor	Moderately differentiated rectal adenocarcinoma
68	Male	69	T3	N0	Mx	T3N0Mx	Rectal neoplasms	Moderately differentiated rectal adenocarcinoma
69	female	63	No data	No data	No data	No data	Rectal neoplasms	Moderately differentiated rectal tubular adenocarcinoma
70	Male	84	T3	N2	M0	T3N2M0	Straight junction tumor	Moderately differentiated rectal tubular adenocarcinoma
71	Male	71	T4	N1	Mx	T4bN1cMx	Colon tumor	Highly differentiated colon adenocarcinoma
72	female	59	No data	No data	No data	No data	Malignant tumor of ascending colon	Poorly differentiated colorectal adenocarcinoma
73	female	78	T3	N0	M0	T3N0M0	Colon tumor	Moderately differentiated colon adenocarcinoma
74	female	77	T3	N1	M0	T3N1M0	Rectal malignant tumor	Moderately differentiated rectal adenocarcinoma
75	female	78	T3	N0	M0	T3N0M0	Rectal neoplasms	Moderately differentiated rectal tubular adenocarcinoma
76	female	72	T4	N2	M0	T4aN2M0	Rectal malignant tumor	Moderately differentiated rectal tubular adenocarcinoma
77	Male	62	T4	N2	M0	T3c/T4bN2aM0	Ascending colon tumor	Moderately differentiated ascending colon adenocarcinoma
78	Male	61	T2	N0	Mx	T2N0Mx	Malignant tumor of hepatic curvature of colon	Moderately differentiated colon adenocarcinoma
79	Male	46	T3	N2	M0	T3N2M0	Colonic neoplasms	Moderately differentiated tubular adenocarcinoma of colon
80	female	75	T4	N0	Mx	T4aN0Mx	Rectal neoplasms	Moderately differentiated rectal tubular adenocarcinoma

## Sheet: Tab2 Sequencing data statistics
Table 2 Information of all sequencing data
Sequencing data statistics
sample number	sample type	H3K4me3 aligned reads	H3K27ac aligned reads	Input aligned reads	RNA-seq aligned reads	H3K4me3 filtered peaks	H3K27ac filtered peaks	sample number	sample type	H3K4me3 aligned reads	H3K27ac aligned reads	Input aligned reads	RNA-seq aligned reads	H3K4me3 filtered peaks	H3K27ac filtered peaks
1	Tumor	69463838	46053212	50740490	32262982	5299	26105	1	Native tissue	88304798	29463061	36225341	30435654	292	15936
2	Tumor	34594936	40431468	37572122	19656706	4201	22981	2	Native tissue	38330035	29580105	38080253	30811000	10834	19593
3	Tumor	19708506	18533279	51203374	NA	15381	13385	3	Native tissue	21876928	21200688	37952920	NA	14592	15510
4	Tumor	26956802	31099598	61322565	19059278	11900	20052	4	Native tissue	13782767	13957435	39339520	33661976	12034	11819
5	Tumor	17572958	18529738	106794808	18016563	14250	16627	5	Native tissue	82306265	101091614	127889738	32785353	18734	36301
6	Tumor	58080600	52724507	47070082	25742114	18202	26107	6	Native tissue	47553130	41151530	47513511	37612815	15420	21698
7	Tumor	47862615	49838715	70595791	31598929	16713	16620	7	Native tissue	42945363	51326773	53981698	30245699	15692	19120
8	Tumor	52919197	53568489	56194768	39021484	16560	18488	8	Native tissue	45717305	52402687	49326935	43012417	15222	17149
9	Tumor	43838227	43229641	50568739	48464793	19712	26993	9	Native tissue	51555530	48216327	60402372	33506625	17890	19832
10	Tumor	73982672	78890736	85842679	42485959	13958	30017	10	Native tissue	57458145	62744686	69882752	28616642	13121	28164
16	Tumor	67753472	74576728	82901839	64940220	14225	19896	16	Native tissue	50907442	52535142	62658768	58563109	15823	18127
17	Tumor	48619775	43254742	46831836	53497426	15833	24540	17	Native tissue	53463778	53639871	60826142	55683703	16250	19256
18	Tumor	44662012	41304579	48704039	80929033	18512	26241	18	Native tissue	44417897	46285612	61122951	51017832	13806	21245
19	Tumor	35225032	19745412	34228002	48682663	14292	5555	19	Native tissue	28271440	18878864	27026491	46110325	11716	6145
20	Tumor	24924333	14421304	25272712	68329893	13084	12794	20	Native tissue	27065803	10975794	18150582	51586012	10293	795
21	Tumor	32427112	18206816	26409355	51579622	12253	13425	21	Native tissue	23574426	19636231	20971494	32713499	13360	1294
22	Tumor	24194586	18112197	24812202	49639580	12713	10760	22	Native tissue	25767530	19364076	36302425	34732496	669	1586
23	Tumor	40184067	46306870	31616684	53237785	13442	10784	23	Native tissue	42672994	37605348	34662558	28682516	14052	13172
24	Tumor	48935987	45611426	46192635	53552594	15080	19791	24	Native tissue	36052027	46739407	45214969	20728157	3484	196
26	Tumor	30860322	25670005	26241324	48533698	16435	13971	26	Native tissue	30087846	27537920	23059667	33552317	13481	4735
27	Tumor	28932756	26985273	25493950	54771451	12269	8298	27	Native tissue	28686621	26801589	25277000	24277852	12769	9654
28	Tumor	32084546	28812987	25474006	30410659	15005	12433	28	Native tissue	29199609	40271550	44614593	31284542	12429	9787
29	Tumor	62323277	54287186	53485367	7334376	14073	18058	29	Native tissue	36213351	34123750	37782464	38980032	16879	23698
30	Tumor	54174535	46647531	41709284	28693879	14404	19602	30	Native tissue	42498405	35128141	37184507	40339363	15032	20959
31	Tumor	90143246	89482112	82659169	33750753	16265	25342	31	Native tissue	69848224	51162129	50388890	26816670	14571	16813
32	Tumor	39993758	39253362	42975505	10531052	13077	21891	32	Native tissue	27386706	33850250	33327109	28813634	13102	14863
33	Tumor	49639045	42364070	42256273	35757867	14710	23410	33	Native tissue	34357783	29284354	28250716	39223190	3601	13895
34	Tumor	28863227	26435024	37092781	62502978	8969	16095	34	Native tissue	30534490	26907085	27540951	59176040	12032	6010
35	Tumor	29622826	24867748	33502585	38960106	7177	21128	35	Native tissue	27332806	30589526	29042506	26713626	8854	16581
36	Tumor	47526408	42167572	54199211	50138560	8176	27535	36	Native tissue	45364223	35644422	33573494	37142532	13474	12618
37	Tumor	43057525	30784720	31463889	58976040	13211	9866	37	Native tissue	41210102	37500899	43536448	24976719	8590	8509
38	Tumor	37588661	70105523	29041371	55655499	13454	11621	38	Native tissue	27219854	46753319	16736633	28092307	9421	8093
39	Tumor	17263503	74499367	30383536	50673264	8790	12605	39	Native tissue	26735073	46918873	26340287	38686165	9927	12932
40	Tumor	37163364	66062463	29531712	48438787	14769	20964	40	Native tissue	34233232	48379068	24233837	32105550	14319	17196
41	Tumor	39301461	53311564	30657716	50979077	13226	7566	41	Native tissue	39419606	49755454	28593274	34789397	14475	11109
42	Tumor	31442683	55644062	18861879	48043338	9534	13397	42	Native tissue	29796962	59708173	20703703	31601031	10222	17421
43	Tumor	20679806	49132907	18465320	57662677	7789	13779	43	Native tissue	47355352	85554030	39509592	27018958	15331	20157
44	Tumor	59301526	48889210	54702105	38243491	15769	29203	44	Native tissue	65572391	63598698	66676625	24006065	15285	26655
45	Tumor	58320345	53134775	49707846	39976582	12857	24388	45	Native tissue	67479335	53206979	65844603	34891131	18358	18762
46	Tumor	66488512	53187064	56052789	18649912	15304	26816	46	Native tissue	63123858	47937274	53219829	21963615	15583	28780
47	Tumor	60505910	50684766	56559590	12924928	17514	33105	47	Native tissue	50782475	42610630	49224279	24516743	15790	24669
48	Tumor	66040009	57445602	64217800	22077060	16725	29349	48	Native tissue	40542272	46130887	44940639	36284680	14019	22512
49	Tumor	58644162	55412669	57235522	39601528	15525	28773	49	Native tissue	54838732	50784883	57406094	25414085	14836	24107
50	Tumor	NA	63761120	54192380	12945628	NA	25650	50	Native tissue	NA	53070725	50601479	30140886	NA	26601
51	Tumor	NA	46594506	55291654	14848604	NA	28685	51	Native tissue	NA	54471573	58004268	26564646	NA	17511
52	Tumor	NA	50303498	55434076	39500942	NA	21564	52	Native tissue	NA	57872257	63267113	42323969	NA	29530
53	Tumor	NA	45165906	61690259	30455937	NA	22324	53	Native tissue	NA	54499120	65191339	40128139	NA	17426
54	Tumor	NA	46797099	38038876	48317312	NA	19596	54	Native tissue	NA	76464561	70275757	48780219	NA	27528
55	Tumor	NA	49209755	58301710	41627091	NA	14400	55	Native tissue	NA	45142236	62145777	42737391	NA	11033
56	Tumor	NA	51755578	51031120	26483544	NA	22206	56	Native tissue	NA	55495158	61877525	30254258	NA	23589
57	Tumor	NA	50026619	56698390	22584257	NA	23446	57	Native tissue	NA	54792904	58269184	28113583	NA	23031
58	Tumor	NA	48820655	47763678	11032757	NA	27298	58	Native tissue	NA	48887168	55293993	21866322	NA	25298
59	Tumor	NA	41497127	44102313	19597765	NA	21305	59	Native tissue	NA	43920182	49921284	19689032	NA	17289
60	Tumor	NA	51366872	72763402	6428335	NA	23121	60	Native tissue	NA	49920038	50241341	20396335	NA	21761
61	Tumor	NA	51280782	56386723	12198192	NA	20377	61	Native tissue	NA	61489009	70798054	15717624	NA	26355
62	Tumor	NA	32399319	41618110	7285606	NA	22618	62	Native tissue	NA	47193244	54062919	25268999	NA	17789
63	Tumor	NA	32061428	53723542	20942065	NA	25142	63	Native tissue	NA	43349111	49698185	23121369	NA	27540
64	Tumor	NA	49660454	54341312	32676786	NA	31213	64	Native tissue	NA	38474151	45589991	35215460	NA	22508
65	Tumor	NA	48328794	57909964	29358271	NA	21296	65	Native tissue	NA	53899014	47920664	30968666	NA	21025
66	Tumor	NA	51212881	49492431	38835477	NA	24868	66	Native tissue	NA	34526821	46993471	35307056	NA	21389
67	Tumor	NA	42348175	47105683	32112356	NA	19803	67	Native tissue	NA	37893870	34428249	30448896	NA	11275
68	Tumor	NA	50901317	50358002	31098196	NA	22154	68	Native tissue	NA	51951215	46924007	24236543	NA	20324
69	Tumor	NA	56734966	55011867	25853871	NA	25399	69	Native tissue	NA	50674094	43479310	17677027	NA	17977
70	Tumor	NA	30796392	37256107	NA	NA	18505	70	Native tissue	NA	49708055	43452967	35895165	NA	22768
71	Tumor	NA	32623543	35538688	45967715	NA	15343	71	Native tissue	NA	NA	NA	NA	NA	NA
72	Tumor	NA	40494683	41685440	42020620	NA	26545	72	Native tissue	NA	51224193	51423724	36600074	NA	27036
73	Tumor	NA	32643747	44193801	39091744	NA	23269	73	Native tissue	NA	56735082	57383523	31639809	NA	18062
74	Tumor	NA	43781664	40416846	33726277	NA	21437	74	Native tissue	NA	67821035	64831731	29917515	NA	22692
75	Tumor	NA	42108948	63366498	30885034	NA	29879	75	Native tissue	NA	70464345	62225676	28955669	NA	13928
76	Tumor	NA	46982966	53874791	35916854	NA	24759	76	Native tissue	NA	29275181	28194140	29885927	NA	15505
77	Tumor	NA	49412490	55340783	31327470	NA	33127	77	Native tissue	NA	31017704	32583514	27836666	NA	15660
78	Tumor	NA	63645503	63592513	14009399	NA	23106	78	Native tissue	NA	72297885	82007934	18787099	NA	23945
79	Tumor	NA	62324128	58870252	29328672	NA	15721	79	Native tissue	NA	65375074	58343126	28853834	NA	16175
80	Tumor	NA	50701388	72068711	25716241	NA	13157	80	Native tissue	NA	67798026	62227941	24859517	NA	16585

## Sheet: Tab3 Significant GAIN VELs info
Table 3 Information of significant GAIN variant enhancer loci in CRC
Significant GAIN VELs information							The H3K27ac signal was normalized by RPM
Chr	Start	End	Tumor H3K27ac signal	Native H3K27ac signal	FC (Tumor / Native)	p-value	p.adj	Recurrence	Carrying samples
chr3	41010518	41015377	2.9268	1.56529	1.86982	2.04996e-21	7.89112e-17	32	sample5,sample42,sample45,sample1,sample55,sample23,sample69,sample31,sample48,sample75,sample39,sample7,sample62,sample17,sample34,sample76,sample58,sample59,sample56,sample64,sample44,sample18,sample50,sample9,sample63,sample73,sample77,sample66,sample61,sample6,sample37,sample36
chr2	161097778	161099022	3.25023	0.977269	3.32583	9.37007e-21	1.80346e-16	32	sample10,sample33,sample1,sample2,sample65,sample47,sample69,sample46,sample31,sample48,sample7,sample62,sample49,sample17,sample76,sample58,sample28,sample56,sample64,sample44,sample35,sample18,sample40,sample50,sample9,sample63,sample73,sample53,sample77,sample66,sample61,sample36
chr10	44357938	44360388	4.17123	1.39732	2.98517	1.48771e-20	1.90893e-16	48	sample80,sample10,sample5,sample42,sample33,sample1,sample4,sample65,sample51,sample47,sample69,sample54,sample32,sample31,sample48,sample75,sample39,sample62,sample49,sample17,sample34,sample30,sample76,sample58,sample28,sample26,sample74,sample70,sample59,sample56,sample72,sample64,sample44,sample29,sample35,sample18,sample40,sample50,sample9,sample63,sample73,sample53,sample77,sample60,sample6…
chr14	95063575	95069392	4.22344	1.47224	2.86872	1.50971e-20	1.45287e-16	57	sample80,sample43,sample10,sample5,sample42,sample45,sample33,sample1,sample55,sample4,sample2,sample65,sample51,sample47,sample69,sample54,sample32,sample46,sample31,sample3,sample48,sample75,sample39,sample7,sample62,sample49,sample17,sample34,sample30,sample76,sample58,sample28,sample26,sample74,sample70,sample59,sample56,sample72,sample16,sample64,sample44,sample35,sample18,sample40,sample50,…
chr2	54270876	54272448	2.26683	0.62509	3.62641	2.10898e-20	1.62366e-16	30	sample10,sample5,sample1,sample4,sample2,sample65,sample51,sample47,sample69,sample46,sample31,sample48,sample75,sample62,sample49,sample17,sample30,sample58,sample59,sample72,sample64,sample44,sample29,sample50,sample9,sample73,sample53,sample66,sample61,sample36
chr12	63179037	63181106	2.34308	0.699957	3.34746	2.8867e-20	1.85201e-16	29	sample10,sample5,sample1,sample55,sample2,sample47,sample69,sample32,sample31,sample48,sample75,sample7,sample62,sample49,sample34,sample30,sample76,sample56,sample72,sample64,sample35,sample18,sample9,sample63,sample77,sample66,sample60,sample6,sample36
chr12	76336848	76340151	3.85701	1.53596	2.51114	4.76177e-20	2.61856e-16	40	sample10,sample5,sample45,sample33,sample1,sample2,sample51,sample47,sample69,sample54,sample32,sample46,sample31,sample3,sample48,sample75,sample39,sample7,sample62,sample68,sample34,sample79,sample30,sample76,sample58,sample59,sample64,sample44,sample29,sample18,sample40,sample50,sample9,sample53,sample77,sample66,sample61,sample6,sample37,sample36
chr12	52628487	52630940	5.29649	1.16922	4.52994	1.37284e-19	6.60576e-16	40	sample10,sample5,sample42,sample55,sample4,sample2,sample65,sample47,sample69,sample54,sample46,sample3,sample48,sample75,sample62,sample17,sample68,sample34,sample58,sample28,sample26,sample70,sample59,sample56,sample72,sample64,sample44,sample29,sample35,sample18,sample40,sample50,sample73,sample53,sample77,sample38,sample66,sample6,sample37,sample36
chr12	76058701	76061344	2.12859	0.507312	4.19583	1.5806e-19	6.76041e-16	28	sample10,sample33,sample1,sample65,sample51,sample47,sample69,sample54,sample46,sample31,sample48,sample75,sample62,sample49,sample58,sample74,sample72,sample64,sample29,sample18,sample50,sample9,sample63,sample73,sample77,sample6,sample37,sample36
chr6	137321493	137325130	4.02061	1.08189	3.71628	6.93307e-19	2.66882e-15	51	sample10,sample27,sample5,sample42,sample33,sample1,sample55,sample65,sample51,sample47,sample69,sample54,sample32,sample31,sample3,sample48,sample75,sample62,sample49,sample17,sample68,sample34,sample79,sample30,sample76,sample58,sample28,sample26,sample74,sample70,sample59,sample56,sample72,sample64,sample44,sample29,sample35,sample18,sample40,sample50,sample9,sample63,sample73,sample53,sample7…
chr2	101395538	101403661	3.73376	0.967525	3.85908	7.63253e-19	2.67097e-15	50	sample43,sample10,sample5,sample42,sample33,sample1,sample55,sample2,sample65,sample51,sample47,sample69,sample54,sample32,sample46,sample31,sample3,sample48,sample75,sample62,sample49,sample17,sample34,sample30,sample76,sample58,sample28,sample26,sample74,sample70,sample59,sample56,sample72,sample64,sample44,sample29,sample35,sample18,sample40,sample50,sample9,sample63,sample73,sample53,sample77…
chr6	151133793	151136155	2.81958	1.0992	2.56511	8.94445e-19	2.86923e-15	26	sample10,sample5,sample33,sample1,sample2,sample65,sample51,sample47,sample31,sample48,sample75,sample62,sample49,sample17,sample68,sample76,sample72,sample64,sample35,sample50,sample9,sample73,sample53,sample77,sample6,sample36
chr6	151355982	151359577	3.36497	0.985925	3.41301	1.20173e-18	3.55842e-15	46	sample10,sample5,sample45,sample33,sample1,sample55,sample4,sample2,sample65,sample51,sample47,sample69,sample54,sample46,sample31,sample3,sample48,sample75,sample62,sample49,sample17,sample34,sample30,sample76,sample58,sample28,sample70,sample59,sample56,sample72,sample64,sample44,sample29,sample35,sample40,sample50,sample9,sample63,sample73,sample53,sample77,sample66,sample61,sample6,sample37,s…
chr12	76351684	76356322	2.54693	0.817769	3.11448	1.25452e-18	3.44939e-15	43	sample43,sample10,sample5,sample33,sample1,sample55,sample2,sample65,sample51,sample47,sample69,sample54,sample46,sample31,sample3,sample48,sample75,sample62,sample49,sample68,sample30,sample76,sample58,sample74,sample59,sample56,sample72,sample64,sample44,sample29,sample35,sample18,sample40,sample50,sample9,sample63,sample73,sample53,sample66,sample61,sample6,sample37,sample36
chr6	74288912	74291037	6.8195	3.4976	1.94976	1.71223e-18	4.39405e-15	31	sample80,sample10,sample5,sample42,sample1,sample55,sample2,sample51,sample47,sample31,sample3,sample48,sample75,sample39,sample49,sample34,sample76,sample26,sample56,sample72,sample16,sample64,sample44,sample35,sample40,sample50,sample73,sample53,sample77,sample37,sample36
chr15	64828266	64829096	2.57649	0.96004	2.68373	2.79835e-18	6.73247e-15	19	sample10,sample5,sample1,sample2,sample51,sample47,sample69,sample31,sample48,sample75,sample17,sample34,sample64,sample35,sample50,sample9,sample63,sample6,sample36
chr21	37303704	37305585	2.10191	0.895226	2.34791	2.96896e-18	6.72276e-15	20	sample10,sample45,sample1,sample2,sample47,sample46,sample31,sample48,sample75,sample49,sample17,sample58,sample64,sample44,sample35,sample18,sample50,sample53,sample77,sample36
chr1	233248115	233250761	2.87353	0.919558	3.1249	2.96907e-18	6.34951e-15	39	sample10,sample5,sample42,sample33,sample1,sample2,sample65,sample51,sample47,sample69,sample46,sample31,sample48,sample75,sample7,sample49,sample17,sample68,sample34,sample30,sample76,sample58,sample28,sample56,sample72,sample16,sample64,sample44,sample35,sample18,sample40,sample50,sample9,sample63,sample53,sample77,sample66,sample6,sample36
chr17	78227489	78229769	4.53555	2.39563	1.89326	4.53417e-18	9.18624e-15	22	sample10,sample5,sample45,sample33,sample55,sample51,sample47,sample48,sample75,sample39,sample68,sample34,sample26,sample59,sample16,sample44,sample35,sample50,sample9,sample73,sample60,sample36
chr2	228682398	228684668	2.72938	0.93953	2.90505	5.00354e-18	9.63032e-15	25	sample10,sample33,sample1,sample2,sample51,sample47,sample31,sample48,sample75,sample7,sample62,sample49,sample30,sample76,sample58,sample56,sample44,sample40,sample50,sample9,sample63,sample73,sample77,sample61,sample6
chr12	47819985	47821442	2.25171	0.411115	5.47708	5.09781e-18	9.34452e-15	28	sample10,sample1,sample2,sample51,sample47,sample69,sample46,sample31,sample75,sample62,sample17,sample30,sample76,sample58,sample74,sample56,sample72,sample64,sample44,sample35,sample50,sample9,sample63,sample73,sample53,sample77,sample66,sample36
chr2	173115259	173119939	2.90068	0.877673	3.30497	5.44079e-18	9.51989e-15	45	sample10,sample5,sample33,sample1,sample55,sample2,sample65,sample51,sample47,sample69,sample54,sample32,sample31,sample48,sample75,sample62,sample49,sample17,sample68,sample30,sample76,sample58,sample28,sample74,sample59,sample56,sample72,sample64,sample44,sample29,sample35,sample18,sample40,sample50,sample9,sample63,sample73,sample53,sample77,sample38,sample66,sample61,sample6,sample37,sample36
chr15	42231839	42233405	2.672	0.830523	3.21725	7.14421e-18	1.14587e-14	32	sample10,sample33,sample1,sample2,sample51,sample47,sample69,sample54,sample46,sample31,sample48,sample75,sample49,sample17,sample68,sample34,sample30,sample76,sample58,sample70,sample59,sample56,sample72,sample64,sample29,sample18,sample9,sample63,sample53,sample77,sample66,sample36
chr9	114872467	114877715	2.38994	0.830185	2.87881	7.7019e-18	1.18591e-14	35	sample10,sample5,sample42,sample33,sample1,sample2,sample51,sample47,sample69,sample54,sample31,sample48,sample62,sample49,sample68,sample30,sample76,sample59,sample56,sample64,sample44,sample29,sample35,sample18,sample40,sample50,sample9,sample63,sample73,sample53,sample77,sample66,sample6,sample37,sample36
chr12	71038129	71040385	1.89332	0.574019	3.29836	8.0755e-18	1.19561e-14	19	sample10,sample33,sample2,sample51,sample47,sample69,sample54,sample46,sample31,sample48,sample49,sample34,sample58,sample64,sample29,sample18,sample9,sample37,sample36
chr19	48625185	48629052	2.46987	0.6213	3.97533	9.22396e-18	1.31506e-14	33	sample10,sample5,sample1,sample55,sample65,sample51,sample47,sample69,sample54,sample32,sample31,sample48,sample75,sample62,sample49,sample17,sample30,sample76,sample58,sample74,sample70,sample59,sample64,sample44,sample35,sample40,sample50,sample9,sample63,sample73,sample77,sample6,sample36
chr1	119501110	119504200	2.98051	0.536747	5.55291	9.7231e-18	1.33672e-14	41	sample10,sample5,sample33,sample1,sample55,sample2,sample65,sample51,sample47,sample69,sample54,sample46,sample31,sample48,sample75,sample62,sample49,sample17,sample34,sample30,sample58,sample28,sample70,sample56,sample72,sample64,sample44,sample29,sample35,sample18,sample40,sample50,sample9,sample63,sample73,sample53,sample77,sample66,sample61,sample6,sample36
chr11	74127590	74130341	1.99146	0.736624	2.7035	1.01215e-17	1.34351e-14	28	sample10,sample45,sample1,sample47,sample69,sample46,sample31,sample48,sample75,sample7,sample62,sample49,sample17,sample30,sample76,sample58,sample64,sample35,sample18,sample40,sample50,sample9,sample63,sample73,sample53,sample77,sample60,sample36
chr6	64515375	64517175	2.50595	0.596563	4.20065	1.11251e-17	1.42749e-14	26	sample10,sample5,sample42,sample33,sample2,sample65,sample51,sample47,sample69,sample54,sample32,sample31,sample48,sample75,sample17,sample58,sample56,sample64,sample44,sample35,sample50,sample9,sample77,sample6,sample37,sample36
chr12	89618083	89620907	4.08696	1.5227	2.68402	1.19791e-17	1.4875e-14	45	sample10,sample5,sample45,sample67,sample33,sample1,sample55,sample4,sample2,sample51,sample47,sample69,sample54,sample32,sample46,sample31,sample3,sample48,sample75,sample62,sample49,sample17,sample68,sample34,sample30,sample76,sample58,sample28,sample59,sample72,sample64,sample44,sample35,sample18,sample40,sample50,sample9,sample63,sample73,sample53,sample77,sample66,sample6,sample37,sample36
chr9	6228583	6231452	2.38513	0.55807	4.27389	1.2389e-17	1.49032e-14	25	sample33,sample65,sample51,sample47,sample69,sample46,sample31,sample48,sample49,sample17,sample68,sample30,sample76,sample58,sample59,sample64,sample29,sample35,sample40,sample9,sample63,sample77,sample66,sample6,sample36
chr12	121114441	121116845	3.3532	0.7264	4.61619	1.33505e-17	1.51152e-14	41	sample10,sample5,sample33,sample1,sample55,sample4,sample65,sample51,sample47,sample69,sample54,sample46,sample31,sample3,sample48,sample75,sample62,sample49,sample17,sample30,sample58,sample74,sample70,sample59,sample56,sample72,sample64,sample29,sample18,sample40,sample50,sample9,sample63,sample73,sample53,sample77,sample66,sample61,sample6,sample37,sample36
chr12	52636443	52643559	3.87967	1.06898	3.62933	1.64288e-17	1.80689e-14	52	sample80,sample10,sample33,sample1,sample55,sample2,sample65,sample23,sample51,sample47,sample69,sample54,sample46,sample31,sample3,sample48,sample75,sample39,sample62,sample49,sample17,sample68,sample34,sample30,sample76,sample58,sample28,sample26,sample74,sample70,sample56,sample72,sample16,sample64,sample44,sample29,sample35,sample18,sample40,sample50,sample9,sample63,sample73,sample53,sample7…
chr20	4114973	4117546	3.27432	0.850685	3.84903	1.9559e-17	2.0914e-14	31	sample10,sample27,sample5,sample33,sample1,sample2,sample51,sample47,sample69,sample31,sample48,sample75,sample62,sample49,sample17,sample34,sample30,sample58,sample56,sample64,sample29,sample35,sample18,sample40,sample50,sample9,sample63,sample53,sample77,sample37,sample36
chr3	171505695	171510989	3.31368	0.91277	3.63036	2.0862e-17	2.17044e-14	48	sample10,sample5,sample42,sample33,sample1,sample55,sample2,sample65,sample51,sample47,sample69,sample54,sample32,sample46,sample31,sample48,sample75,sample39,sample7,sample49,sample17,sample34,sample30,sample76,sample58,sample28,sample70,sample59,sample56,sample72,sample64,sample44,sample29,sample35,sample18,sample50,sample9,sample63,sample73,sample53,sample77,sample38,sample66,sample60,sample61…
chr12	31316043	31316426	4.45783	0.605601	7.36101	2.35456e-17	2.38517e-14	26	sample10,sample1,sample2,sample51,sample47,sample69,sample46,sample31,sample48,sample75,sample62,sample49,sample17,sample76,sample58,sample74,sample72,sample64,sample18,sample50,sample9,sample63,sample73,sample77,sample66,sample6
chr6	30736102	30738906	4.65079	1.42309	3.26808	2.62425e-17	2.59021e-14	45	sample80,sample10,sample27,sample5,sample42,sample33,sample1,sample55,sample2,sample51,sample47,sample69,sample32,sample46,sample31,sample3,sample48,sample75,sample39,sample62,sample49,sample68,sample34,sample30,sample58,sample28,sample26,sample74,sample56,sample72,sample16,sample44,sample29,sample35,sample18,sample50,sample73,sample53,sample77,sample38,sample66,sample60,sample61,sample6,sample37
chr7	37070598	37072807	2.99948	1.0619	2.82464	2.63423e-17	2.53505e-14	35	sample10,sample33,sample1,sample55,sample2,sample65,sample51,sample47,sample69,sample46,sample31,sample48,sample75,sample62,sample49,sample17,sample68,sample30,sample76,sample58,sample59,sample56,sample64,sample44,sample29,sample18,sample40,sample50,sample63,sample77,sample66,sample60,sample61,sample6,sample36
chr12	63359083	63361772	2.21636	0.426469	5.19701	2.92984e-17	2.75076e-14	25	sample10,sample1,sample65,sample51,sample47,sample69,sample54,sample46,sample31,sample48,sample62,sample49,sample17,sample79,sample76,sample58,sample28,sample59,sample64,sample29,sample35,sample9,sample73,sample6,sample36
chr12	115791739	115792753	3.40847	1.35472	2.516	3.03777e-17	2.78419e-14	32	sample80,sample5,sample33,sample1,sample2,sample65,sample51,sample47,sample69,sample54,sample46,sample31,sample48,sample75,sample39,sample49,sample17,sample34,sample58,sample70,sample56,sample16,sample44,sample29,sample35,sample18,sample50,sample9,sample73,sample77,sample60,sample36
chr6	150172840	150178614	2.29284	0.64011	3.58194	3.25064e-17	2.84387e-14	38	sample10,sample5,sample33,sample1,sample55,sample2,sample65,sample51,sample47,sample69,sample54,sample32,sample46,sample31,sample48,sample75,sample49,sample17,sample34,sample30,sample76,sample74,sample72,sample64,sample44,sample35,sample18,sample40,sample50,sample9,sample63,sample73,sample77,sample66,sample61,sample6,sample37,sample36
chr3	197683891	197685370	3.67511	1.54404	2.38019	3.43041e-17	2.93445e-14	23	sample33,sample2,sample65,sample54,sample62,sample49,sample17,sample34,sample30,sample58,sample28,sample56,sample72,sample64,sample44,sample35,sample40,sample9,sample63,sample77,sample66,sample6,sample37
chr15	89709942	89712262	2.3939	0.788442	3.03624	3.50692e-17	2.93468e-14	23	sample10,sample45,sample33,sample1,sample2,sample51,sample47,sample69,sample31,sample48,sample49,sample34,sample30,sample58,sample64,sample29,sample35,sample18,sample50,sample9,sample77,sample66,sample36
chr2	224560500	224565148	1.87119	0.22368	8.36549	3.8743e-17	3.17313e-14	34	sample10,sample33,sample1,sample2,sample51,sample47,sample69,sample54,sample46,sample31,sample3,sample48,sample75,sample7,sample49,sample17,sample30,sample76,sample58,sample70,sample59,sample56,sample72,sample64,sample44,sample29,sample35,sample18,sample9,sample63,sample77,sample66,sample6,sample36
chr21	36507951	36513857	2.85709	0.379535	7.52787	4.3663e-17	3.29562e-14	49	sample43,sample10,sample5,sample33,sample1,sample55,sample4,sample2,sample65,sample51,sample47,sample69,sample54,sample46,sample31,sample3,sample48,sample75,sample7,sample62,sample49,sample17,sample34,sample30,sample76,sample58,sample28,sample74,sample70,sample59,sample56,sample72,sample64,sample44,sample29,sample35,sample18,sample40,sample50,sample9,sample63,sample73,sample53,sample77,sample66,s…
chr3	8484567	8487538	3.02958	1.46598	2.06659	4.48002e-17	3.31642e-14	36	sample5,sample33,sample1,sample55,sample4,sample2,sample65,sample51,sample69,sample32,sample46,sample31,sample75,sample39,sample7,sample62,sample49,sample17,sample30,sample76,sample28,sample74,sample59,sample64,sample44,sample18,sample40,sample50,sample9,sample63,sample73,sample53,sample77,sample66,sample37,sample36
chr15	93343970	93349032	5.40401	3.20238	1.6875	4.6668e-17	3.38951e-14	19	sample27,sample5,sample67,sample33,sample55,sample2,sample23,sample51,sample47,sample48,sample75,sample34,sample76,sample28,sample74,sample59,sample35,sample77,sample36
chr10	124066036	124071752	5.49915	1.85005	2.97244	4.94655e-17	3.52616e-14	56	sample80,sample10,sample5,sample42,sample67,sample33,sample1,sample55,sample4,sample2,sample65,sample23,sample51,sample47,sample69,sample54,sample32,sample46,sample31,sample3,sample48,sample75,sample39,sample62,sample49,sample17,sample68,sample34,sample30,sample76,sample58,sample28,sample26,sample74,sample56,sample72,sample16,sample64,sample44,sample29,sample35,sample18,sample40,sample50,sample9,…
chr15	60661769	60675714	3.52593	1.72377	2.04548	5.41768e-17	3.79178e-14	47	sample43,sample10,sample5,sample45,sample67,sample33,sample1,sample55,sample4,sample51,sample47,sample69,sample54,sample32,sample31,sample48,sample75,sample39,sample7,sample62,sample49,sample17,sample34,sample30,sample58,sample28,sample26,sample74,sample70,sample59,sample56,sample72,sample64,sample29,sample35,sample18,sample40,sample50,sample9,sample73,sample53,sample77,sample66,sample61,sample6,…
chr7	26191200	26201635	5.59087	2.18633	2.5572	5.6043e-17	3.85236e-14	40	sample10,sample27,sample5,sample42,sample1,sample55,sample4,sample2,sample47,sample69,sample46,sample31,sample3,sample48,sample75,sample39,sample62,sample17,sample68,sample34,sample30,sample76,sample58,sample28,sample74,sample56,sample72,sample64,sample44,sample18,sample40,sample50,sample9,sample63,sample73,sample53,sample66,sample6,sample37,sample36
chr6	155648358	155652074	2.56313	0.489613	5.23501	5.64524e-17	3.81242e-14	36	sample10,sample5,sample1,sample65,sample51,sample47,sample69,sample54,sample32,sample31,sample48,sample75,sample62,sample49,sample17,sample30,sample76,sample58,sample74,sample59,sample56,sample72,sample64,sample44,sample35,sample40,sample50,sample9,sample63,sample73,sample53,sample66,sample61,sample6,sample37,sample36
chr19	46133039	46134816	2.34895	0.804955	2.91811	6.12449e-17	3.99587e-14	25	sample10,sample33,sample1,sample2,sample65,sample51,sample47,sample69,sample46,sample31,sample48,sample75,sample58,sample59,sample56,sample64,sample29,sample35,sample18,sample50,sample9,sample63,sample77,sample6,sample36
chr16	14492083	14495947	2.72648	0.811276	3.36073	6.34342e-17	4.06973e-14	44	sample10,sample5,sample33,sample1,sample55,sample2,sample65,sample51,sample47,sample69,sample32,sample46,sample31,sample3,sample48,sample75,sample39,sample7,sample62,sample49,sample17,sample30,sample76,sample58,sample28,sample74,sample56,sample72,sample64,sample44,sample29,sample35,sample18,sample40,sample50,sample9,sample63,sample73,sample53,sample77,sample66,sample60,sample61,sample36
chr9	99824233	99825559	1.98429	0.398612	4.97798	6.60227e-17	4.16636e-14	14	sample33,sample1,sample47,sample69,sample48,sample17,sample58,sample64,sample44,sample35,sample50,sample63,sample73,sample36
chr3	149057694	149059154	2.39541	0.77162	3.10439	7.38112e-17	4.58272e-14	16	sample33,sample2,sample65,sample47,sample46,sample31,sample48,sample49,sample58,sample64,sample35,sample9,sample63,sample77,sample6,sample36
chr10	95142703	95145062	2.57917	0.837473	3.07971	7.44275e-17	4.54764e-14	27	sample10,sample5,sample33,sample1,sample2,sample51,sample47,sample31,sample48,sample75,sample39,sample7,sample49,sample17,sample34,sample76,sample58,sample70,sample72,sample64,sample35,sample18,sample50,sample9,sample77,sample60,sample36
chr2	84839525	84840869	2.1572	0.357644	6.0317	7.66634e-17	4.61106e-14	21	sample1,sample65,sample47,sample69,sample31,sample48,sample75,sample62,sample49,sample17,sample30,sample64,sample35,sample40,sample50,sample9,sample63,sample73,sample66,sample61,sample36
chr2	173912431	173915365	2.49737	0.716999	3.48309	7.8918e-17	4.67364e-14	32	sample10,sample5,sample33,sample1,sample55,sample2,sample65,sample51,sample47,sample69,sample46,sample31,sample48,sample62,sample49,sample17,sample34,sample30,sample58,sample70,sample59,sample64,sample44,sample29,sample35,sample50,sample53,sample77,sample61,sample6,sample37,sample36
chr12	115812669	115814190	2.61446	0.569629	4.58976	8.2002e-17	4.78271e-14	23	sample5,sample1,sample2,sample51,sample47,sample69,sample46,sample48,sample7,sample62,sample49,sample17,sample76,sample58,sample64,sample35,sample18,sample50,sample9,sample73,sample53,sample77,sample36
chr1	150576646	150578675	3.89116	1.84797	2.10564	8.2406e-17	4.73453e-14	42	sample80,sample10,sample42,sample45,sample33,sample1,sample55,sample4,sample2,sample51,sample47,sample69,sample46,sample31,sample3,sample48,sample75,sample39,sample7,sample49,sample17,sample68,sample34,sample76,sample58,sample28,sample26,sample59,sample56,sample64,sample44,sample29,sample35,sample18,sample40,sample50,sample9,sample63,sample77,sample6,sample37,sample36
chr2	106534085	106537052	2.16696	0.430726	5.03095	8.28463e-17	4.68983e-14	30	sample10,sample5,sample33,sample1,sample65,sample51,sample47,sample69,sample31,sample48,sample75,sample62,sample49,sample17,sample76,sample58,sample56,sample72,sample64,sample44,sample29,sample40,sample50,sample9,sample63,sample73,sample77,sample66,sample61,sample36
chr16	16039736	16041881	3.07834	1.17101	2.62879	9.44003e-17	5.26644e-14	16	sample5,sample33,sample1,sample2,sample54,sample75,sample62,sample17,sample30,sample76,sample58,sample59,sample29,sample18,sample73,sample77
chr14	69063066	69068708	4.48397	2.46711	1.8175	1.0787e-16	5.93193e-14	35	sample10,sample45,sample67,sample33,sample55,sample2,sample51,sample47,sample69,sample54,sample46,sample31,sample48,sample75,sample39,sample62,sample49,sample17,sample34,sample30,sample76,sample28,sample26,sample59,sample64,sample35,sample9,sample63,sample73,sample53,sample77,sample66,sample6,sample37,sample36
chr15	72528996	72530667	3.61667	1.02569	3.52608	1.15621e-16	6.18155e-14	35	sample10,sample42,sample33,sample1,sample2,sample51,sample47,sample69,sample46,sample31,sample48,sample75,sample7,sample49,sample17,sample34,sample30,sample76,sample58,sample28,sample72,sample64,sample44,sample29,sample35,sample18,sample50,sample9,sample63,sample53,sample77,sample66,sample60,sample37,sample36
chr12	31229856	31232549	2.26793	0.586634	3.86601	1.16202e-16	6.12752e-14	27	sample10,sample33,sample1,sample2,sample65,sample51,sample47,sample69,sample46,sample31,sample48,sample17,sample34,sample30,sample76,sample58,sample28,sample59,sample72,sample29,sample35,sample18,sample9,sample77,sample66,sample6,sample37
chr5	135370283	135380085	3.11892	1.25312	2.48893	1.19064e-16	6.19357e-14	40	sample10,sample5,sample1,sample4,sample65,sample51,sample47,sample69,sample32,sample46,sample31,sample3,sample48,sample75,sample62,sample17,sample34,sample30,sample76,sample58,sample28,sample26,sample70,sample59,sample56,sample72,sample64,sample44,sample29,sample35,sample18,sample40,sample50,sample9,sample63,sample53,sample77,sample66,sample6,sample36
chr2	13697934	13699293	2.12869	0.151164	14.0819	1.29258e-16	6.63419e-14	24	sample10,sample5,sample33,sample1,sample51,sample69,sample54,sample31,sample48,sample49,sample17,sample76,sample28,sample74,sample59,sample64,sample29,sample35,sample40,sample9,sample63,sample61,sample6,sample36
chr8	124681468	124684880	4.8676	1.96034	2.48304	1.44657e-16	7.32686e-14	41	sample5,sample42,sample33,sample1,sample55,sample4,sample23,sample51,sample47,sample69,sample31,sample3,sample48,sample75,sample39,sample7,sample62,sample49,sample17,sample68,sample76,sample58,sample28,sample26,sample74,sample59,sample56,sample64,sample44,sample35,sample18,sample40,sample50,sample9,sample63,sample73,sample77,sample66,sample6,sample37,sample36
chr7	26205437	26207939	3.57382	1.09356	3.26806	1.50128e-16	7.50524e-14	40	sample43,sample10,sample5,sample1,sample55,sample2,sample65,sample51,sample47,sample69,sample32,sample46,sample31,sample48,sample75,sample7,sample62,sample49,sample17,sample68,sample30,sample76,sample58,sample74,sample56,sample72,sample64,sample44,sample40,sample50,sample9,sample63,sample73,sample53,sample77,sample66,sample61,sample6,sample37,sample36
chr15	63186198	63190398	3.50154	1.42424	2.45853	1.51962e-16	7.4995e-14	50	sample80,sample10,sample42,sample33,sample1,sample55,sample2,sample65,sample23,sample47,sample69,sample54,sample32,sample46,sample31,sample48,sample75,sample39,sample62,sample49,sample17,sample68,sample34,sample30,sample76,sample58,sample28,sample26,sample74,sample59,sample56,sample72,sample16,sample64,sample44,sample29,sample35,sample18,sample40,sample50,sample63,sample73,sample53,sample77,sampl…
chr1	207903673	207904575	2.20675	0.382061	5.77591	1.68192e-16	8.09298e-14	15	sample33,sample1,sample51,sample47,sample48,sample75,sample49,sample76,sample58,sample72,sample9,sample63,sample73,sample66,sample6
chr20	48858160	48867759	4.07576	0.95222	4.28027	1.79981e-16	8.55333e-14	48	sample10,sample5,sample33,sample1,sample55,sample2,sample65,sample51,sample47,sample69,sample54,sample32,sample46,sample31,sample48,sample75,sample39,sample7,sample62,sample49,sample17,sample34,sample30,sample76,sample58,sample28,sample74,sample70,sample56,sample72,sample64,sample44,sample29,sample35,sample18,sample40,sample50,sample9,sample63,sample73,sample53,sample77,sample66,sample60,sample61…
chr1	183148971	183151204	3.18963	1.19239	2.67499	1.97486e-16	9.27076e-14	31	sample10,sample42,sample33,sample1,sample65,sample51,sample47,sample69,sample54,sample46,sample31,sample48,sample75,sample49,sample17,sample30,sample58,sample59,sample16,sample64,sample44,sample35,sample40,sample50,sample63,sample73,sample77,sample66,sample6,sample37,sample36
chr21	36354854	36357057	2.43145	0.930526	2.61299	1.98244e-16	9.19422e-14	26	sample10,sample5,sample1,sample55,sample65,sample46,sample31,sample48,sample75,sample39,sample7,sample49,sample17,sample34,sample76,sample58,sample70,sample56,sample44,sample29,sample35,sample18,sample50,sample77,sample60,sample36
chr12	76369776	76380744	3.02822	1.38812	2.18153	1.99087e-16	9.12338e-14	42	sample10,sample5,sample45,sample33,sample1,sample55,sample2,sample65,sample47,sample69,sample54,sample46,sample31,sample3,sample48,sample75,sample39,sample62,sample49,sample17,sample68,sample34,sample79,sample30,sample76,sample58,sample28,sample26,sample74,sample59,sample64,sample35,sample18,sample50,sample9,sample73,sample53,sample77,sample66,sample6,sample37,sample36
chr11	86234716	86236199	2.43515	0.868462	2.80398	2.0425e-16	9.14232e-14	19	sample33,sample2,sample47,sample31,sample48,sample75,sample49,sample30,sample76,sample58,sample59,sample44,sample35,sample18,sample40,sample50,sample63,sample77,sample36
chr6	136913906	136916893	3.03241	0.886726	3.41979	2.17565e-16	9.62637e-14	39	sample10,sample5,sample42,sample33,sample1,sample2,sample65,sample51,sample47,sample69,sample54,sample32,sample46,sample31,sample48,sample75,sample39,sample49,sample17,sample34,sample30,sample76,sample58,sample28,sample59,sample72,sample64,sample44,sample29,sample35,sample18,sample40,sample50,sample9,sample77,sample66,sample61,sample37,sample36
chr3	41155580	41161130	3.1187	1.29438	2.40941	2.27241e-16	9.94023e-14	42	sample10,sample5,sample42,sample45,sample1,sample55,sample51,sample47,sample69,sample32,sample31,sample3,sample48,sample75,sample62,sample49,sample17,sample68,sample76,sample58,sample28,sample74,sample70,sample59,sample56,sample72,sample64,sample44,sample35,sample18,sample40,sample50,sample9,sample63,sample73,sample53,sample77,sample66,sample60,sample6,sample37,sample36
chr14	68924302	68928212	3.68673	1.50665	2.44697	2.33535e-16	1.01008e-13	39	sample10,sample5,sample1,sample55,sample2,sample51,sample47,sample69,sample54,sample46,sample31,sample3,sample48,sample75,sample62,sample49,sample17,sample34,sample30,sample76,sample58,sample74,sample59,sample56,sample72,sample64,sample35,sample18,sample40,sample50,sample9,sample63,sample73,sample53,sample77,sample66,sample6,sample37,sample36
chr19	46569841	46574609	2.3037	0.288363	7.9889	2.51514e-16	1.07575e-13	31	sample43,sample5,sample33,sample1,sample2,sample65,sample47,sample69,sample46,sample31,sample48,sample7,sample62,sample49,sample17,sample30,sample76,sample58,sample74,sample56,sample64,sample44,sample35,sample18,sample40,sample50,sample9,sample53,sample66,sample37,sample36
chr19	4811572	4814559	4.09953	2.15309	1.90402	2.56298e-16	1.08417e-13	30	sample80,sample10,sample33,sample55,sample4,sample2,sample23,sample51,sample47,sample31,sample48,sample75,sample39,sample7,sample62,sample17,sample34,sample76,sample58,sample28,sample74,sample59,sample72,sample44,sample18,sample9,sample53,sample77,sample60,sample36
chr9	88551533	88552905	2.45722	0.97523	2.51963	2.79513e-16	1.16952e-13	25	sample33,sample1,sample65,sample51,sample47,sample69,sample54,sample32,sample31,sample48,sample75,sample17,sample30,sample76,sample58,sample72,sample64,sample44,sample18,sample40,sample73,sample53,sample77,sample61,sample36
chr6	30729939	30733071	5.25583	1.30262	4.03483	2.82549e-16	1.16951e-13	51	sample80,sample10,sample5,sample42,sample33,sample1,sample55,sample4,sample2,sample65,sample51,sample47,sample69,sample54,sample32,sample46,sample31,sample3,sample48,sample75,sample62,sample49,sample68,sample34,sample30,sample76,sample58,sample28,sample74,sample59,sample56,sample72,sample64,sample44,sample29,sample35,sample18,sample40,sample50,sample9,sample63,sample73,sample53,sample77,sample38,…
chr1	8142712	8144617	3.15971	1.26707	2.49372	2.83489e-16	1.16092e-13	27	sample10,sample33,sample1,sample2,sample51,sample47,sample54,sample46,sample31,sample48,sample75,sample62,sample49,sample34,sample58,sample56,sample64,sample44,sample29,sample35,sample40,sample50,sample9,sample77,sample66,sample6,sample36
chr16	69103914	69108302	3.49746	0.445962	7.8425	2.86279e-16	1.16e-13	43	sample10,sample5,sample33,sample1,sample55,sample2,sample65,sample51,sample47,sample69,sample54,sample32,sample46,sample31,sample48,sample75,sample62,sample49,sample17,sample68,sample34,sample30,sample76,sample58,sample74,sample59,sample56,sample72,sample64,sample44,sample29,sample35,sample40,sample50,sample9,sample63,sample53,sample77,sample66,sample61,sample6,sample37,sample36
chr1	171342428	171343116	3.95284	1.25128	3.15903	3.03569e-16	1.21725e-13	31	sample1,sample4,sample51,sample47,sample69,sample54,sample32,sample46,sample31,sample48,sample75,sample62,sample49,sample17,sample68,sample76,sample58,sample70,sample59,sample56,sample72,sample64,sample35,sample40,sample50,sample9,sample63,sample73,sample77,sample66,sample36
chr17	57828845	57836715	3.0316	1.44395	2.09952	3.48118e-16	1.35358e-13	46	sample27,sample5,sample42,sample67,sample33,sample1,sample55,sample2,sample65,sample23,sample51,sample47,sample69,sample54,sample32,sample46,sample31,sample3,sample48,sample75,sample39,sample7,sample62,sample49,sample17,sample68,sample34,sample30,sample76,sample28,sample59,sample56,sample64,sample44,sample35,sample18,sample40,sample50,sample63,sample73,sample53,sample77,sample60,sample61,sample6,…
chr3	11242723	11244069	2.76615	0.706326	3.91625	3.52757e-16	1.3579e-13	20	sample10,sample1,sample2,sample47,sample31,sample48,sample75,sample17,sample56,sample72,sample64,sample35,sample18,sample40,sample50,sample9,sample63,sample77,sample6,sample36
chr16	27282892	27286590	2.98117	0.745792	3.99732	3.69774e-16	1.40931e-13	43	sample10,sample27,sample5,sample33,sample1,sample55,sample2,sample65,sample51,sample47,sample69,sample31,sample48,sample75,sample7,sample62,sample49,sample17,sample68,sample34,sample30,sample76,sample58,sample26,sample74,sample59,sample56,sample72,sample64,sample44,sample35,sample18,sample40,sample50,sample9,sample63,sample53,sample77,sample66,sample61,sample6,sample37,sample36
chr16	72324917	72326097	2.14788	0.594181	3.61486	3.72241e-16	1.40481e-13	14	sample80,sample47,sample46,sample31,sample48,sample39,sample7,sample49,sample76,sample35,sample18,sample50,sample77,sample36
chr15	39419006	39421410	2.06732	0.84307	2.45213	4.25953e-16	1.56159e-13	17	sample10,sample69,sample46,sample31,sample48,sample49,sample30,sample76,sample16,sample64,sample35,sample40,sample50,sample63,sample77,sample60,sample36
chr1	183627068	183627974	2.17684	0.434702	5.00767	4.33051e-16	1.57263e-13	17	sample33,sample1,sample47,sample32,sample46,sample48,sample75,sample49,sample17,sample30,sample76,sample72,sample9,sample53,sample77,sample66,sample6
chr3	40979671	40981834	2.72415	0.623293	4.37057	4.59315e-16	1.65242e-13	31	sample10,sample5,sample1,sample55,sample65,sample51,sample69,sample54,sample31,sample75,sample62,sample49,sample17,sample30,sample76,sample56,sample64,sample44,sample35,sample18,sample40,sample50,sample9,sample63,sample73,sample53,sample66,sample61,sample6,sample37,sample36
chr3	149015943	149019251	2.19847	0.973595	2.2581	4.59791e-16	1.63881e-13	33	sample10,sample5,sample45,sample33,sample1,sample51,sample47,sample69,sample54,sample31,sample48,sample75,sample62,sample49,sample68,sample34,sample30,sample76,sample58,sample28,sample59,sample72,sample64,sample29,sample35,sample18,sample9,sample73,sample77,sample66,sample6,sample37,sample36
chr6	147234995	147237146	2.46758	0.912116	2.70534	4.62395e-16	1.63298e-13	25	sample10,sample33,sample2,sample47,sample46,sample48,sample75,sample7,sample49,sample34,sample76,sample58,sample56,sample16,sample64,sample44,sample35,sample18,sample40,sample50,sample63,sample77,sample60,sample6,sample36
chr16	9141522	9142515	2.61267	1.12234	2.32788	4.83919e-16	1.69345e-13	21	sample10,sample5,sample1,sample2,sample47,sample69,sample31,sample48,sample75,sample39,sample49,sample17,sample58,sample56,sample64,sample29,sample77,sample60,sample61,sample6,sample36
chr3	119863533	119868359	3.59239	1.28152	2.80323	4.84025e-16	1.67856e-13	41	sample10,sample5,sample33,sample1,sample55,sample2,sample65,sample51,sample47,sample69,sample54,sample32,sample31,sample48,sample75,sample62,sample49,sample17,sample30,sample76,sample58,sample28,sample59,sample72,sample64,sample44,sample29,sample35,sample18,sample40,sample50,sample9,sample63,sample73,sample53,sample77,sample66,sample61,sample6,sample37,sample36
chr1	172416515	172420382	2.9566	0.711767	4.15389	4.8588e-16	1.66995e-13	38	sample5,sample33,sample1,sample2,sample65,sample51,sample47,sample69,sample54,sample46,sample31,sample48,sample75,sample62,sample49,sample17,sample68,sample30,sample76,sample58,sample28,sample59,sample56,sample72,sample64,sample44,sample29,sample35,sample18,sample40,sample50,sample9,sample63,sample53,sample77,sample66,sample6,sample36
chr14	88509819	88512864	2.16911	0.462924	4.68567	4.87272e-16	1.65992e-13	28	sample43,sample5,sample33,sample1,sample2,sample65,sample51,sample47,sample69,sample46,sample31,sample48,sample75,sample49,sample17,sample30,sample58,sample74,sample64,sample40,sample50,sample9,sample63,sample77,sample61,sample6,sample37,sample36
chr20	50475608	50477688	4.16025	0.505665	8.22728	4.90597e-16	1.65658e-13	38	sample43,sample10,sample27,sample5,sample1,sample4,sample65,sample51,sample69,sample32,sample31,sample75,sample7,sample62,sample49,sample17,sample30,sample76,sample58,sample74,sample59,sample56,sample64,sample44,sample35,sample18,sample40,sample50,sample9,sample63,sample73,sample53,sample77,sample66,sample61,sample6,sample37,sample36
chr4	143394176	143397261	3.37336	0.623871	5.40714	4.90924e-16	1.64327e-13	40	sample43,sample10,sample5,sample42,sample1,sample55,sample2,sample51,sample47,sample69,sample54,sample46,sample31,sample3,sample48,sample75,sample49,sample17,sample34,sample30,sample76,sample58,sample28,sample74,sample59,sample56,sample72,sample64,sample44,sample29,sample35,sample18,sample40,sample50,sample9,sample63,sample53,sample77,sample66,sample36
chr7	130568814	130576710	3.53708	1.73053	2.04393	5.03157e-16	1.6697e-13	38	sample5,sample45,sample33,sample1,sample55,sample2,sample51,sample47,sample31,sample48,sample75,sample39,sample7,sample62,sample17,sample68,sample34,sample30,sample76,sample58,sample28,sample74,sample59,sample72,sample16,sample64,sample44,sample40,sample9,sample63,sample73,sample53,sample77,sample66,sample60,sample6,sample37,sample36
chr10	75658370	75659932	2.43757	0.958185	2.54394	5.03556e-16	1.65674e-13	17	sample10,sample1,sample2,sample47,sample31,sample48,sample75,sample7,sample49,sample34,sample76,sample35,sample18,sample50,sample77,sample60,sample36
chr2	174915484	174919674	2.76617	0.746872	3.70367	5.11665e-16	1.65513e-13	36	sample43,sample33,sample1,sample55,sample2,sample65,sample51,sample69,sample54,sample32,sample46,sample31,sample48,sample75,sample49,sample17,sample30,sample76,sample58,sample28,sample70,sample59,sample56,sample64,sample44,sample35,sample18,sample40,sample50,sample9,sample63,sample73,sample77,sample66,sample61,sample36
chr11	33710582	33715325	4.62677	2.08148	2.22283	5.76991e-16	1.83559e-13	41	sample5,sample45,sample67,sample33,sample1,sample55,sample4,sample47,sample69,sample32,sample46,sample31,sample3,sample48,sample75,sample7,sample62,sample49,sample17,sample68,sample76,sample28,sample74,sample59,sample56,sample72,sample64,sample44,sample35,sample18,sample40,sample50,sample9,sample63,sample73,sample53,sample77,sample66,sample6,sample37,sample36
chr3	149101743	149107216	3.41139	1.03006	3.31182	6.14449e-16	1.93874e-13	50	sample80,sample10,sample5,sample42,sample33,sample1,sample55,sample4,sample2,sample65,sample51,sample47,sample69,sample54,sample46,sample31,sample3,sample48,sample75,sample62,sample49,sample17,sample68,sample34,sample30,sample76,sample58,sample28,sample74,sample70,sample59,sample56,sample64,sample44,sample29,sample35,sample18,sample40,sample50,sample9,sample63,sample73,sample53,sample77,sample38,…
chr14	68934599	68936643	2.56813	0.803056	3.19794	6.74299e-16	2.11028e-13	32	sample43,sample10,sample5,sample1,sample2,sample65,sample69,sample46,sample31,sample48,sample75,sample7,sample62,sample49,sample17,sample34,sample30,sample76,sample56,sample64,sample35,sample18,sample40,sample50,sample9,sample63,sample53,sample77,sample66,sample6,sample37,sample36
chr7	102513577	102516879	1.79707	0.359197	5.00303	6.98674e-16	2.16893e-13	14	sample10,sample33,sample47,sample46,sample31,sample48,sample39,sample7,sample34,sample76,sample29,sample18,sample50,sample9
chr2	161060681	161067308	4.2105	2.46377	1.70897	7.0018e-16	2.15622e-13	27	sample5,sample33,sample1,sample51,sample47,sample69,sample54,sample75,sample62,sample17,sample68,sample34,sample28,sample26,sample74,sample59,sample64,sample35,sample18,sample9,sample63,sample73,sample53,sample77,sample66,sample6,sample36
chr20	48803074	48804670	4.28638	1.56891	2.73208	7.09835e-16	2.1686e-13	35	sample10,sample5,sample42,sample55,sample2,sample47,sample69,sample54,sample32,sample46,sample48,sample75,sample62,sample17,sample68,sample58,sample74,sample70,sample56,sample72,sample64,sample44,sample35,sample18,sample40,sample50,sample63,sample53,sample77,sample66,sample60,sample61,sample6,sample37,sample36
chr14	54078132	54082973	2.91165	0.70385	4.13675	7.22661e-16	2.1904e-13	46	sample43,sample10,sample5,sample42,sample45,sample33,sample1,sample55,sample2,sample65,sample51,sample47,sample69,sample54,sample32,sample46,sample31,sample48,sample75,sample62,sample49,sample17,sample68,sample34,sample30,sample76,sample58,sample28,sample74,sample70,sample59,sample56,sample64,sample44,sample29,sample35,sample18,sample40,sample50,sample9,sample63,sample53,sample77,sample6,sample37…
chr9	67026263	67027881	2.84359	0.911426	3.11994	7.24961e-16	2.18021e-13	22	sample33,sample2,sample47,sample69,sample54,sample46,sample31,sample48,sample17,sample76,sample58,sample59,sample56,sample64,sample44,sample35,sample18,sample50,sample9,sample63,sample77,sample6
chr20	48383680	48395527	4.61937	1.62775	2.83788	7.40434e-16	2.20948e-13	54	sample43,sample10,sample5,sample42,sample45,sample33,sample1,sample55,sample4,sample2,sample65,sample51,sample47,sample69,sample54,sample46,sample31,sample3,sample48,sample75,sample7,sample62,sample49,sample17,sample68,sample34,sample30,sample76,sample58,sample28,sample74,sample70,sample59,sample56,sample72,sample16,sample64,sample44,sample35,sample18,sample40,sample50,sample9,sample63,sample73,s…
chr4	56707598	56708825	2.91063	0.297682	9.77764	7.51024e-16	2.22384e-13	35	sample10,sample33,sample1,sample4,sample51,sample47,sample69,sample54,sample32,sample31,sample3,sample48,sample75,sample62,sample49,sample17,sample30,sample58,sample28,sample26,sample74,sample70,sample59,sample64,sample18,sample40,sample50,sample9,sample63,sample73,sample77,sample66,sample6,sample37,sample36
chr5	14035665	14038991	1.89786	0.488648	3.8839	7.54855e-16	2.21812e-13	17	sample33,sample1,sample2,sample47,sample31,sample48,sample75,sample39,sample7,sample34,sample76,sample64,sample35,sample18,sample9,sample77,sample36
chr9	97615542	97617868	1.98312	0.462384	4.28891	7.79901e-16	2.25726e-13	26	sample10,sample5,sample33,sample1,sample55,sample65,sample47,sample69,sample54,sample31,sample48,sample49,sample17,sample34,sample30,sample58,sample64,sample44,sample35,sample18,sample40,sample9,sample73,sample77,sample6,sample36
chr20	49176900	49179156	3.50644	1.13444	3.0909	7.90823e-16	2.27179e-13	38	sample80,sample10,sample27,sample5,sample42,sample33,sample1,sample55,sample4,sample2,sample65,sample47,sample69,sample46,sample31,sample48,sample75,sample39,sample49,sample17,sample34,sample30,sample76,sample58,sample56,sample16,sample64,sample44,sample35,sample18,sample50,sample63,sample53,sample77,sample60,sample6,sample37,sample36
chr12	13893772	13894766	2.10571	0.691544	3.04494	7.97356e-16	2.27359e-13	17	sample47,sample69,sample31,sample62,sample49,sample17,sample76,sample58,sample59,sample56,sample64,sample44,sample50,sample9,sample63,sample6,sample36
chr12	116307257	116312438	3.49588	0.610376	5.72743	8.45864e-16	2.39417e-13	45	sample43,sample10,sample5,sample42,sample33,sample1,sample2,sample65,sample51,sample47,sample69,sample54,sample32,sample46,sample31,sample3,sample48,sample75,sample62,sample49,sample17,sample68,sample30,sample76,sample58,sample28,sample70,sample59,sample56,sample72,sample64,sample44,sample35,sample40,sample50,sample9,sample63,sample73,sample53,sample77,sample66,sample61,sample6,sample37,sample36
chr2	178261726	178263212	2.27273	1.20824	1.88103	9.49107e-16	2.66678e-13	15	sample10,sample1,sample51,sample69,sample31,sample75,sample49,sample76,sample72,sample18,sample50,sample9,sample77,sample60,sample6
chr2	27974245	27977092	4.04603	1.00136	4.04053	9.5541e-16	2.66504e-13	44	sample10,sample5,sample42,sample33,sample1,sample55,sample2,sample65,sample51,sample47,sample69,sample54,sample46,sample31,sample3,sample48,sample75,sample62,sample49,sample17,sample68,sample30,sample58,sample28,sample74,sample70,sample59,sample56,sample72,sample64,sample44,sample35,sample40,sample50,sample9,sample63,sample73,sample53,sample77,sample66,sample61,sample6,sample37,sample36
chr10	29947392	29949655	3.033	1.61956	1.87273	9.73201e-16	2.67588e-13	25	sample10,sample33,sample1,sample2,sample51,sample47,sample31,sample48,sample75,sample49,sample34,sample30,sample76,sample58,sample59,sample64,sample44,sample18,sample40,sample9,sample73,sample53,sample77,sample6,sample36
chr6	150622989	150624759	3.54313	1.22422	2.8942	9.81669e-16	2.66115e-13	37	sample10,sample5,sample42,sample1,sample65,sample51,sample47,sample69,sample54,sample32,sample31,sample48,sample62,sample49,sample17,sample68,sample30,sample76,sample28,sample59,sample56,sample72,sample64,sample44,sample29,sample35,sample40,sample50,sample9,sample63,sample73,sample53,sample77,sample61,sample6,sample37,sample36
chr17	55369874	55373274	2.12564	0.801665	2.65153	9.82282e-16	2.64419e-13	26	sample10,sample1,sample55,sample65,sample51,sample47,sample69,sample31,sample75,sample62,sample49,sample17,sample34,sample30,sample58,sample70,sample64,sample44,sample29,sample18,sample40,sample9,sample63,sample73,sample53,sample6
chr9	99101381	99103559	2.43604	0.941853	2.58643	1.03486e-15	2.76639e-13	33	sample10,sample5,sample33,sample1,sample55,sample2,sample65,sample51,sample47,sample69,sample31,sample48,sample75,sample62,sample49,sample17,sample30,sample76,sample58,sample74,sample59,sample56,sample64,sample44,sample35,sample18,sample50,sample9,sample53,sample77,sample6,sample37,sample36
chr13	31618774	31621837	6.95862	2.33758	2.97684	1.03624e-15	2.75096e-13	46	sample10,sample5,sample42,sample45,sample33,sample1,sample55,sample4,sample65,sample51,sample47,sample69,sample54,sample32,sample31,sample48,sample75,sample7,sample62,sample49,sample17,sample68,sample34,sample76,sample58,sample28,sample74,sample70,sample59,sample56,sample72,sample64,sample44,sample35,sample18,sample40,sample50,sample9,sample63,sample73,sample53,sample77,sample66,sample6,sample37,…
chr1	23015445	23016841	2.48659	0.590802	4.20884	1.10051e-15	2.88183e-13	28	sample5,sample1,sample65,sample51,sample47,sample69,sample54,sample31,sample75,sample62,sample17,sample68,sample30,sample76,sample58,sample70,sample56,sample72,sample64,sample44,sample40,sample9,sample63,sample73,sample77,sample66,sample6,sample36
chr7	111570480	111572449	2.04615	0.504234	4.05794	1.10551e-15	2.87536e-13	23	sample33,sample1,sample2,sample65,sample51,sample47,sample69,sample46,sample31,sample75,sample17,sample58,sample44,sample29,sample35,sample18,sample50,sample9,sample73,sample77,sample61,sample6,sample36
chr6	81148400	81151467	2.11326	0.511302	4.1331	1.12954e-15	2.91816e-13	27	sample10,sample5,sample33,sample1,sample2,sample65,sample51,sample47,sample69,sample54,sample32,sample31,sample48,sample49,sample17,sample58,sample59,sample56,sample64,sample35,sample40,sample50,sample9,sample77,sample66,sample6,sample36
chr22	30590786	30594481	3.54363	1.4236	2.4892	1.15906e-15	2.97445e-13	41	sample10,sample42,sample45,sample33,sample1,sample55,sample2,sample51,sample47,sample69,sample54,sample32,sample46,sample31,sample48,sample75,sample39,sample7,sample62,sample49,sample17,sample34,sample30,sample28,sample26,sample70,sample59,sample72,sample16,sample64,sample44,sample29,sample35,sample18,sample50,sample9,sample53,sample77,sample66,sample61,sample36
chr20	48313064	48315343	2.68689	1.01861	2.6378	1.17802e-15	3.0031e-13	32	sample10,sample1,sample55,sample65,sample51,sample47,sample69,sample54,sample32,sample31,sample62,sample49,sample17,sample34,sample30,sample76,sample58,sample59,sample56,sample64,sample29,sample35,sample18,sample40,sample50,sample9,sample73,sample53,sample77,sample66,sample6,sample36
chr3	31411080	31414564	2.04414	0.356237	5.73815	1.19728e-15	3.0321e-13	32	sample10,sample1,sample65,sample51,sample47,sample69,sample46,sample31,sample48,sample62,sample49,sample17,sample68,sample30,sample76,sample58,sample59,sample72,sample64,sample44,sample29,sample35,sample40,sample9,sample63,sample73,sample53,sample66,sample61,sample6,sample37,sample36
chr6	6882319	6887408	2.63923	1.265	2.08635	1.20501e-15	3.03174e-13	29	sample10,sample5,sample42,sample51,sample47,sample54,sample46,sample31,sample48,sample75,sample17,sample34,sample58,sample70,sample59,sample72,sample64,sample29,sample35,sample40,sample50,sample9,sample53,sample77,sample38,sample66,sample60,sample61,sample36
chr2	201628917	201632682	1.9991	0.575502	3.47367	1.30451e-15	3.26078e-13	31	sample10,sample33,sample1,sample2,sample51,sample47,sample69,sample54,sample31,sample48,sample75,sample39,sample7,sample49,sample17,sample34,sample30,sample58,sample28,sample74,sample70,sample64,sample29,sample18,sample50,sample9,sample63,sample77,sample66,sample6,sample36
chr3	171851626	171860953	3.2912	1.82269	1.80569	1.31726e-15	3.25044e-13	38	sample43,sample10,sample5,sample33,sample1,sample55,sample4,sample2,sample51,sample47,sample69,sample54,sample46,sample31,sample48,sample75,sample7,sample62,sample49,sample17,sample68,sample34,sample58,sample74,sample59,sample56,sample72,sample64,sample35,sample18,sample50,sample9,sample73,sample77,sample66,sample60,sample37,sample36
chr3	46148935	46154270	3.1246	1.08856	2.87039	1.33792e-15	3.28036e-13	43	sample43,sample10,sample5,sample42,sample45,sample1,sample55,sample2,sample65,sample47,sample69,sample46,sample31,sample3,sample48,sample75,sample7,sample62,sample49,sample17,sample34,sample79,sample76,sample26,sample56,sample72,sample16,sample64,sample44,sample35,sample18,sample40,sample50,sample9,sample63,sample73,sample53,sample77,sample66,sample61,sample6,sample37,sample36
chr9	114878975	114884788	4.1774	1.64817	2.53457	1.35947e-15	3.29128e-13	45	sample27,sample5,sample42,sample45,sample33,sample1,sample55,sample4,sample51,sample47,sample69,sample54,sample32,sample31,sample48,sample75,sample62,sample49,sample17,sample68,sample79,sample30,sample76,sample58,sample28,sample74,sample70,sample59,sample56,sample72,sample64,sample44,sample29,sample35,sample40,sample50,sample9,sample73,sample53,sample77,sample66,sample61,sample6,sample37,sample36
chr3	30618636	30621771	2.8536	1.06829	2.6712	1.37095e-15	3.29833e-13	37	sample5,sample33,sample1,sample65,sample51,sample47,sample69,sample32,sample46,sample31,sample48,sample75,sample7,sample62,sample49,sample17,sample68,sample34,sample76,sample28,sample74,sample59,sample56,sample72,sample64,sample44,sample35,sample18,sample40,sample50,sample9,sample63,sample73,sample77,sample66,sample6,sample36
chr2	158102130	158104114	2.58094	0.53388	4.8343	1.37503e-15	3.28761e-13	30	sample10,sample5,sample33,sample1,sample2,sample51,sample47,sample46,sample31,sample48,sample75,sample39,sample7,sample49,sample17,sample34,sample76,sample58,sample26,sample56,sample72,sample64,sample44,sample35,sample18,sample40,sample50,sample9,sample77,sample36
chr12	47615137	47618506	3.56258	1.77266	2.00974	1.37753e-15	3.27325e-13	31	sample5,sample67,sample33,sample1,sample4,sample2,sample65,sample51,sample69,sample3,sample62,sample49,sample17,sample68,sample30,sample26,sample59,sample72,sample64,sample35,sample18,sample40,sample50,sample9,sample63,sample53,sample77,sample66,sample6,sample37,sample36
chr15	101260624	101264029	2.3908	0.786134	3.04121	1.3982e-15	3.28185e-13	30	sample80,sample10,sample33,sample1,sample2,sample47,sample69,sample46,sample31,sample48,sample75,sample49,sample17,sample76,sample58,sample16,sample64,sample44,sample35,sample18,sample40,sample50,sample9,sample63,sample53,sample77,sample66,sample61,sample6,sample36
chr6	90007081	90009951	3.88603	1.44388	2.69138	1.41019e-15	3.23119e-13	42	sample10,sample27,sample5,sample42,sample1,sample55,sample2,sample65,sample51,sample47,sample69,sample54,sample31,sample48,sample75,sample62,sample49,sample17,sample68,sample34,sample30,sample76,sample28,sample74,sample56,sample72,sample64,sample44,sample29,sample35,sample40,sample50,sample9,sample63,sample73,sample53,sample77,sample66,sample61,sample6,sample37,sample36
chr7	55200078	55202177	4.13717	1.93417	2.13899	1.43276e-15	3.26347e-13	36	sample80,sample10,sample27,sample33,sample1,sample55,sample4,sample2,sample65,sample23,sample51,sample47,sample69,sample54,sample48,sample75,sample39,sample34,sample76,sample58,sample26,sample74,sample56,sample72,sample16,sample64,sample44,sample29,sample35,sample18,sample40,sample50,sample77,sample60,sample6,sample36
chr6	151364427	151367448	4.45363	2.25389	1.97597	1.48426e-15	3.36089e-13	33	sample80,sample10,sample33,sample1,sample55,sample2,sample51,sample47,sample69,sample31,sample3,sample75,sample62,sample49,sample17,sample34,sample30,sample58,sample28,sample26,sample56,sample72,sample64,sample44,sample29,sample35,sample18,sample40,sample50,sample73,sample53,sample77,sample6
chr2	43519518	43522483	2.7519	1.53994	1.78702	1.51402e-15	3.40822e-13	28	sample5,sample33,sample1,sample23,sample47,sample69,sample46,sample48,sample75,sample62,sample49,sample17,sample30,sample76,sample58,sample70,sample59,sample56,sample64,sample44,sample35,sample50,sample63,sample73,sample77,sample61,sample37,sample36
chr1	8135317	8140228	2.92047	1.40363	2.08065	1.60777e-15	3.55687e-13	32	sample10,sample5,sample33,sample1,sample2,sample51,sample47,sample54,sample31,sample48,sample75,sample39,sample7,sample62,sample68,sample30,sample76,sample74,sample56,sample72,sample64,sample44,sample29,sample35,sample18,sample9,sample63,sample73,sample77,sample66,sample6,sample36
chr22	41063974	41066162	2.63887	0.827058	3.19067	1.62072e-15	3.56503e-13	18	sample10,sample1,sample2,sample47,sample46,sample31,sample48,sample75,sample17,sample30,sample56,sample64,sample29,sample35,sample18,sample40,sample77,sample36
chr3	190283715	190285054	2.54897	0.496203	5.13696	1.64503e-15	3.59793e-13	18	sample10,sample33,sample1,sample2,sample51,sample47,sample46,sample31,sample48,sample75,sample39,sample49,sample58,sample56,sample35,sample9,sample77,sample36
chr7	36316238	36333013	4.46696	2.27195	1.96613	1.65726e-15	3.60422e-13	50	sample80,sample10,sample42,sample33,sample1,sample55,sample2,sample65,sample51,sample47,sample69,sample46,sample31,sample3,sample48,sample75,sample39,sample7,sample62,sample49,sample17,sample68,sample34,sample30,sample76,sample58,sample28,sample26,sample74,sample59,sample56,sample72,sample16,sample64,sample44,sample35,sample18,sample40,sample50,sample9,sample63,sample73,sample53,sample77,sample66…
chr12	14093850	14095217	2.14868	0.516419	4.16072	1.72041e-15	3.69975e-13	20	sample10,sample33,sample1,sample2,sample65,sample51,sample47,sample69,sample46,sample31,sample48,sample49,sample17,sample30,sample64,sample44,sample35,sample9,sample77,sample36
chr8	19521027	19524238	1.87379	0.355374	5.27273	1.72067e-15	3.67974e-13	17	sample10,sample42,sample2,sample47,sample69,sample46,sample31,sample3,sample48,sample34,sample64,sample29,sample35,sample50,sample9,sample77,sample36
chr5	176752178	176756063	2.81392	0.896965	3.13715	1.75915e-15	3.74125e-13	37	sample10,sample33,sample1,sample2,sample51,sample47,sample69,sample32,sample46,sample31,sample48,sample39,sample62,sample49,sample17,sample68,sample34,sample30,sample76,sample58,sample59,sample56,sample72,sample64,sample44,sample35,sample40,sample50,sample9,sample63,sample53,sample77,sample66,sample60,sample61,sample6,sample36
chr10	124090146	124093068	3.23633	0.492724	6.56824	1.76458e-15	3.71179e-13	42	sample10,sample5,sample42,sample33,sample1,sample55,sample2,sample65,sample51,sample47,sample69,sample32,sample46,sample31,sample3,sample48,sample75,sample62,sample49,sample17,sample34,sample30,sample76,sample58,sample28,sample59,sample56,sample64,sample44,sample29,sample35,sample18,sample40,sample50,sample9,sample63,sample73,sample77,sample66,sample61,sample37,sample36
chr21	38568673	38573634	2.11988	0.583238	3.63468	1.78339e-15	3.71081e-13	42	sample43,sample10,sample5,sample33,sample1,sample55,sample4,sample2,sample65,sample51,sample47,sample69,sample32,sample46,sample31,sample75,sample49,sample17,sample34,sample30,sample58,sample26,sample74,sample56,sample72,sample64,sample44,sample29,sample35,sample18,sample40,sample50,sample9,sample63,sample73,sample53,sample77,sample66,sample61,sample6,sample37,sample36
chr22	46923385	46925026	2.34547	0.899401	2.60782	1.81765e-15	3.74165e-13	15	sample10,sample1,sample2,sample51,sample69,sample75,sample72,sample64,sample44,sample35,sample18,sample40,sample63,sample66,sample36
chr12	47669690	47672790	3.53197	2.05947	1.71499	1.84723e-15	3.78231e-13	20	sample5,sample45,sample67,sample33,sample55,sample2,sample51,sample32,sample31,sample75,sample17,sample79,sample59,sample64,sample18,sample40,sample9,sample53,sample77,sample6
chr2	201808716	201810337	3.91139	1.38232	2.82959	1.84768e-15	3.7632e-13	42	sample10,sample5,sample42,sample33,sample1,sample2,sample51,sample47,sample69,sample32,sample31,sample48,sample75,sample62,sample49,sample17,sample68,sample30,sample76,sample58,sample28,sample70,sample59,sample56,sample72,sample64,sample44,sample29,sample35,sample18,sample40,sample50,sample9,sample63,sample73,sample53,sample77,sample38,sample66,sample61,sample37,sample36
chr1	150949000	150950878	4.78213	2.23171	2.14281	1.86927e-15	3.78714e-13	26	sample10,sample5,sample2,sample65,sample51,sample32,sample46,sample31,sample75,sample62,sample17,sample68,sample34,sample30,sample76,sample70,sample72,sample64,sample18,sample40,sample53,sample77,sample66,sample6,sample37,sample36
chr16	57926195	57929246	2.9874	1.22251	2.44367	1.89865e-15	3.80659e-13	30	sample43,sample10,sample1,sample55,sample2,sample47,sample32,sample46,sample48,sample75,sample39,sample62,sample49,sample17,sample34,sample76,sample58,sample72,sample64,sample44,sample35,sample18,sample40,sample9,sample73,sample77,sample66,sample61,sample6,sample36
chr13	101044392	101046798	2.05303	0.97753	2.10022	1.93301e-15	3.85541e-13	22	sample10,sample45,sample33,sample1,sample2,sample47,sample69,sample46,sample31,sample48,sample75,sample56,sample44,sample29,sample35,sample18,sample50,sample9,sample63,sample77,sample6,sample36
chr9	118053550	118055689	2.30753	0.961315	2.40039	1.93831e-15	3.84604e-13	21	sample5,sample1,sample2,sample65,sample51,sample47,sample69,sample31,sample75,sample49,sample17,sample58,sample74,sample64,sample35,sample40,sample9,sample73,sample77,sample66,sample36
chr11	35256606	35259423	2.63163	0.834092	3.15508	2.02015e-15	3.98788e-13	29	sample10,sample1,sample2,sample65,sample47,sample69,sample54,sample32,sample46,sample31,sample48,sample75,sample62,sample49,sample17,sample34,sample30,sample58,sample28,sample64,sample44,sample29,sample35,sample40,sample9,sample73,sample53,sample66,sample36
chr5	173958509	173962654	2.19531	0.286557	7.661	2.02384e-15	3.97479e-13	27	sample10,sample33,sample1,sample2,sample51,sample47,sample69,sample31,sample48,sample62,sample49,sample17,sample34,sample76,sample59,sample56,sample72,sample64,sample29,sample35,sample18,sample50,sample9,sample77,sample66,sample61,sample36
chr5	70896436	70897600	2.97123	1.40369	2.11673	2.07681e-15	4.03761e-13	22	sample10,sample45,sample33,sample1,sample2,sample47,sample69,sample54,sample31,sample48,sample62,sample17,sample68,sample76,sample58,sample64,sample44,sample63,sample73,sample53,sample77,sample36
chr9	111341074	111344320	1.76191	0.283932	6.2054	2.12392e-15	4.10846e-13	19	sample5,sample1,sample65,sample51,sample69,sample46,sample48,sample62,sample49,sample17,sample58,sample56,sample64,sample44,sample35,sample40,sample77,sample6,sample36
chr16	86697118	86699920	4.98499	1.40158	3.55668	2.18595e-15	4.20729e-13	48	sample10,sample5,sample42,sample45,sample33,sample1,sample55,sample2,sample51,sample47,sample69,sample32,sample31,sample3,sample48,sample75,sample39,sample7,sample62,sample49,sample17,sample68,sample34,sample76,sample58,sample28,sample74,sample70,sample59,sample56,sample72,sample64,sample44,sample29,sample35,sample18,sample40,sample50,sample9,sample63,sample73,sample53,sample77,sample66,sample61,…
chr5	140381002	140384406	2.18059	0.295675	7.37497	2.20018e-15	4.21362e-13	28	sample10,sample42,sample33,sample1,sample2,sample51,sample47,sample69,sample54,sample31,sample48,sample49,sample30,sample28,sample56,sample72,sample64,sample29,sample35,sample18,sample40,sample9,sample63,sample73,sample77,sample66,sample6,sample36
chr3	4781387	4786920	3.61662	2.38739	1.51488	2.24012e-15	4.26887e-13	19	sample80,sample10,sample33,sample2,sample51,sample69,sample54,sample75,sample39,sample62,sample34,sample28,sample26,sample72,sample64,sample35,sample18,sample73,sample77
chr6	16728133	16730517	2.67772	1.08032	2.47865	2.42181e-15	4.59238e-13	24	sample10,sample33,sample1,sample2,sample65,sample51,sample47,sample69,sample46,sample31,sample48,sample62,sample49,sample17,sample34,sample76,sample72,sample64,sample35,sample18,sample9,sample77,sample60,sample36
chr12	76344475	76348831	2.4112	1.07724	2.23832	2.4772e-15	4.67438e-13	31	sample10,sample5,sample33,sample1,sample2,sample51,sample47,sample69,sample54,sample46,sample31,sample48,sample75,sample7,sample62,sample49,sample30,sample58,sample56,sample72,sample64,sample44,sample18,sample40,sample9,sample53,sample77,sample66,sample6,sample37,sample36
chr1	8149632	8159033	3.74356	1.82932	2.04642	2.55264e-15	4.70149e-13	41	sample10,sample5,sample42,sample45,sample33,sample1,sample2,sample51,sample47,sample54,sample46,sample31,sample3,sample48,sample75,sample39,sample62,sample49,sample17,sample68,sample34,sample76,sample74,sample70,sample59,sample56,sample72,sample64,sample44,sample29,sample35,sample18,sample9,sample73,sample53,sample77,sample38,sample66,sample6,sample37,sample36
chr4	141012394	141021332	2.23591	1.23611	1.80883	2.61122e-15	4.78648e-13	35	sample10,sample5,sample45,sample33,sample1,sample2,sample51,sample47,sample69,sample46,sample31,sample48,sample75,sample39,sample62,sample49,sample17,sample76,sample58,sample28,sample56,sample72,sample64,sample35,sample18,sample40,sample50,sample9,sample73,sample53,sample77,sample66,sample60,sample61,sample36
chr10	32228572	32234218	2.39039	0.597791	3.99869	2.66734e-15	4.8662e-13	37	sample10,sample5,sample33,sample1,sample4,sample2,sample65,sample51,sample47,sample69,sample54,sample31,sample48,sample62,sample49,sample17,sample68,sample34,sample30,sample58,sample70,sample59,sample44,sample29,sample35,sample18,sample40,sample50,sample9,sample63,sample73,sample53,sample77,sample66,sample6,sample37,sample36
chr2	234154753	234157846	2.66376	1.01331	2.62877	2.70609e-15	4.89052e-13	33	sample42,sample33,sample1,sample2,sample65,sample51,sample47,sample69,sample32,sample46,sample31,sample48,sample17,sample34,sample30,sample76,sample58,sample70,sample59,sample56,sample72,sample64,sample44,sample35,sample18,sample40,sample50,sample9,sample63,sample53,sample77,sample6,sample36
chr2	111129035	111130565	3.3082	0.975797	3.39025	2.88608e-15	5.16729e-13	36	sample10,sample5,sample33,sample1,sample2,sample47,sample69,sample32,sample46,sample31,sample48,sample75,sample62,sample49,sample17,sample30,sample76,sample58,sample74,sample56,sample72,sample64,sample35,sample40,sample50,sample9,sample63,sample73,sample53,sample77,sample66,sample60,sample61,sample6,sample37,sample36
chr4	159991843	159993819	2.95992	0.996036	2.9717	2.93988e-15	5.23925e-13	35	sample43,sample10,sample42,sample33,sample2,sample65,sample51,sample47,sample69,sample46,sample31,sample48,sample75,sample62,sample49,sample17,sample68,sample30,sample76,sample58,sample26,sample59,sample56,sample72,sample64,sample44,sample35,sample40,sample50,sample9,sample63,sample61,sample6,sample37,sample36
chr9	132355832	132374698	5.52373	2.66892	2.06965	2.95307e-15	5.2385e-13	49	sample80,sample10,sample27,sample5,sample1,sample55,sample2,sample65,sample23,sample51,sample47,sample69,sample32,sample31,sample3,sample48,sample75,sample39,sample62,sample49,sample17,sample68,sample34,sample30,sample76,sample58,sample28,sample26,sample74,sample70,sample59,sample56,sample72,sample16,sample64,sample44,sample35,sample18,sample40,sample50,sample9,sample63,sample73,sample53,sample77…
chr2	48336338	48342511	3.28436	1.61641	2.03188	2.9741e-15	5.25161e-13	37	sample80,sample43,sample10,sample5,sample45,sample33,sample1,sample55,sample2,sample51,sample47,sample69,sample32,sample31,sample48,sample75,sample39,sample62,sample17,sample34,sample76,sample58,sample26,sample74,sample59,sample72,sample64,sample44,sample35,sample18,sample63,sample73,sample53,sample77,sample6,sample37,sample36
chr9	132095772	132097681	8.54079	3.78861	2.25433	2.97697e-15	5.23266e-13	17	sample10,sample27,sample33,sample4,sample2,sample65,sample47,sample62,sample17,sample58,sample74,sample44,sample18,sample63,sample73,sample60,sample37
chr20	50646626	50650339	3.91445	0.616826	6.34612	3.1432e-15	5.47486e-13	48	sample43,sample10,sample27,sample5,sample42,sample1,sample55,sample4,sample65,sample51,sample47,sample69,sample54,sample32,sample46,sample31,sample3,sample48,sample75,sample7,sample62,sample49,sample17,sample68,sample34,sample30,sample76,sample58,sample28,sample74,sample59,sample56,sample72,sample64,sample44,sample35,sample18,sample40,sample50,sample9,sample63,sample53,sample77,sample66,sample61,…
chr12	117528225	117533850	2.50921	0.464461	5.40241	3.45705e-15	5.91447e-13	41	sample10,sample5,sample33,sample1,sample55,sample4,sample2,sample65,sample51,sample47,sample69,sample54,sample46,sample31,sample3,sample48,sample75,sample62,sample17,sample34,sample30,sample76,sample58,sample74,sample70,sample72,sample64,sample44,sample29,sample35,sample18,sample50,sample9,sample63,sample73,sample53,sample77,sample66,sample61,sample6,sample36
chr6	35335083	35339589	2.4514	1.10678	2.2149	3.47426e-15	5.91762e-13	29	sample10,sample5,sample1,sample2,sample51,sample47,sample69,sample32,sample46,sample31,sample48,sample75,sample7,sample49,sample17,sample68,sample34,sample76,sample58,sample72,sample64,sample44,sample35,sample50,sample63,sample77,sample60,sample6,sample36
chr11	67346331	67349488	3.01242	0.813131	3.70472	3.573e-15	6.05898e-13	16	sample27,sample2,sample69,sample54,sample75,sample76,sample58,sample56,sample72,sample64,sample35,sample18,sample40,sample66,sample6,sample37
chr3	107705091	107709091	3.37971	1.68935	2.0006	3.69059e-15	6.20374e-13	33	sample5,sample45,sample33,sample1,sample55,sample4,sample51,sample47,sample69,sample31,sample48,sample75,sample62,sample49,sample34,sample76,sample58,sample28,sample26,sample70,sample59,sample72,sample64,sample35,sample18,sample9,sample73,sample53,sample77,sample66,sample6,sample37,sample36
chr11	47968166	47969340	2.66002	1.31989	2.01533	3.76867e-15	6.28013e-13	17	sample10,sample45,sample33,sample1,sample2,sample51,sample47,sample69,sample31,sample75,sample58,sample44,sample29,sample63,sample73,sample77,sample36
chr5	140899052	140903057	4.22597	1.63023	2.59226	3.78937e-15	6.28742e-13	42	sample10,sample5,sample42,sample45,sample33,sample1,sample51,sample47,sample69,sample54,sample31,sample3,sample48,sample75,sample62,sample49,sample17,sample34,sample79,sample30,sample76,sample58,sample28,sample70,sample59,sample56,sample72,sample64,sample44,sample29,sample35,sample18,sample40,sample50,sample9,sample73,sample53,sample77,sample38,sample66,sample37,sample36
chr19	3519747	3521428	3.11073	0.767303	4.0541	3.81146e-15	6.29693e-13	20	sample33,sample55,sample65,sample69,sample31,sample49,sample17,sample34,sample26,sample74,sample70,sample56,sample72,sample64,sample35,sample9,sample63,sample53,sample77,sample6
chr5	135387388	135390414	2.65253	1.19273	2.22392	3.94478e-15	6.46172e-13	31	sample10,sample5,sample33,sample1,sample2,sample65,sample47,sample69,sample46,sample3,sample48,sample75,sample17,sample30,sample76,sample58,sample28,sample56,sample64,sample44,sample29,sample35,sample18,sample40,sample50,sample9,sample63,sample53,sample77,sample66,sample36
chr3	125365608	125367446	3.79548	1.11543	3.40271	4.0213e-15	6.55915e-13	42	sample10,sample5,sample42,sample33,sample1,sample65,sample51,sample47,sample69,sample54,sample46,sample31,sample48,sample75,sample62,sample49,sample17,sample68,sample76,sample58,sample28,sample74,sample59,sample56,sample72,sample64,sample44,sample35,sample18,sample40,sample50,sample9,sample63,sample73,sample53,sample77,sample38,sample66,sample61,sample6,sample37,sample36
chr3	88311661	88313243	2.38589	0.5347	4.4621	4.08821e-15	6.64015e-13	29	sample10,sample4,sample65,sample51,sample47,sample69,sample54,sample31,sample48,sample75,sample62,sample17,sample79,sample28,sample70,sample59,sample56,sample72,sample64,sample35,sample50,sample9,sample63,sample73,sample53,sample66,sample61,sample6,sample36
chr9	92170219	92172349	3.9343	1.19361	3.29613	4.21165e-15	6.7834e-13	43	sample10,sample5,sample42,sample1,sample55,sample2,sample65,sample51,sample47,sample69,sample32,sample31,sample3,sample48,sample75,sample62,sample49,sample17,sample68,sample34,sample30,sample58,sample74,sample70,sample59,sample56,sample72,sample64,sample44,sample29,sample35,sample18,sample40,sample50,sample9,sample63,sample73,sample53,sample77,sample66,sample61,sample6,sample36
chr11	36170504	36172225	2.13606	0.528056	4.04514	4.38645e-15	7.00631e-13	22	sample10,sample5,sample33,sample1,sample2,sample47,sample46,sample48,sample75,sample39,sample7,sample76,sample56,sample64,sample44,sample35,sample40,sample50,sample63,sample77,sample66,sample36
chr8	67035758	67037051	2.06854	0.606366	3.41138	4.39162e-15	6.98558e-13	15	sample10,sample33,sample2,sample46,sample48,sample75,sample39,sample7,sample49,sample17,sample18,sample50,sample9,sample77,sample60
chr17	15859657	15864352	2.62473	0.949675	2.76382	4.40679e-15	6.98087e-13	42	sample10,sample5,sample45,sample33,sample1,sample55,sample2,sample65,sample51,sample47,sample69,sample54,sample46,sample31,sample3,sample48,sample75,sample39,sample7,sample49,sample17,sample34,sample30,sample58,sample28,sample74,sample70,sample59,sample56,sample64,sample44,sample29,sample18,sample50,sample9,sample63,sample77,sample66,sample61,sample6,sample37,sample36
chr12	12986741	12994461	3.59886	1.46185	2.46185	4.51359e-15	7.12075e-13	46	sample10,sample5,sample42,sample33,sample1,sample55,sample4,sample2,sample51,sample47,sample69,sample54,sample32,sample31,sample3,sample48,sample75,sample7,sample62,sample49,sample17,sample68,sample34,sample30,sample76,sample58,sample28,sample74,sample70,sample59,sample56,sample72,sample64,sample44,sample29,sample35,sample18,sample40,sample9,sample63,sample53,sample77,sample66,sample6,sample37,sa…
chr17	77958520	77968912	4.66271	1.60782	2.90002	4.71774e-15	7.3823e-13	47	sample43,sample10,sample27,sample5,sample42,sample33,sample1,sample55,sample4,sample2,sample65,sample51,sample47,sample69,sample54,sample32,sample46,sample31,sample48,sample75,sample62,sample49,sample17,sample34,sample30,sample76,sample58,sample74,sample56,sample72,sample64,sample44,sample35,sample18,sample40,sample50,sample9,sample63,sample73,sample53,sample77,sample38,sample66,sample61,sample6,…
chr9	111204215	111209326	2.3108	0.414462	5.57541	4.71822e-15	7.35317e-13	45	sample43,sample10,sample5,sample1,sample55,sample65,sample23,sample51,sample47,sample69,sample32,sample31,sample3,sample48,sample75,sample7,sample62,sample49,sample17,sample68,sample30,sample76,sample58,sample74,sample70,sample59,sample56,sample72,sample64,sample44,sample29,sample35,sample40,sample50,sample9,sample63,sample73,sample53,sample77,sample66,sample60,sample61,sample6,sample37,sample36
chr20	45829045	45830205	2.65423	0.91871	2.88908	4.76975e-15	7.40349e-13	18	sample33,sample1,sample47,sample69,sample31,sample48,sample62,sample17,sample76,sample72,sample64,sample44,sample9,sample63,sample73,sample77,sample6,sample36
chr3	112470639	112471881	2.08366	0.552898	3.76862	4.94027e-15	7.63738e-13	16	sample1,sample51,sample47,sample69,sample49,sample68,sample76,sample56,sample72,sample64,sample50,sample9,sample63,sample73,sample6,sample36
chr12	52672533	52676265	3.42425	1.00475	3.40807	4.95158e-15	7.62424e-13	45	sample80,sample10,sample33,sample1,sample55,sample2,sample65,sample23,sample51,sample47,sample69,sample54,sample32,sample46,sample31,sample48,sample75,sample62,sample49,sample17,sample34,sample76,sample58,sample26,sample74,sample70,sample56,sample72,sample16,sample64,sample44,sample29,sample35,sample18,sample40,sample50,sample9,sample63,sample73,sample77,sample38,sample66,sample60,sample61,sample…
chr10	24671086	24675810	3.52277	1.86853	1.88532	4.97328e-15	7.62714e-13	34	sample10,sample45,sample67,sample33,sample1,sample55,sample2,sample51,sample47,sample48,sample75,sample7,sample62,sample49,sample17,sample34,sample79,sample76,sample58,sample28,sample26,sample74,sample59,sample72,sample64,sample35,sample50,sample9,sample73,sample77,sample66,sample61,sample37,sample36
chr17	70334495	70336077	3.5525	1.15867	3.06602	5.00677e-15	7.64804e-13	33	sample10,sample65,sample51,sample47,sample69,sample54,sample31,sample48,sample75,sample49,sample17,sample68,sample34,sample30,sample76,sample58,sample28,sample59,sample56,sample72,sample64,sample44,sample29,sample35,sample18,sample40,sample50,sample9,sample63,sample53,sample77,sample66,sample36
chr9	6242834	6245079	2.49771	0.387734	6.44182	5.23079e-15	7.92733e-13	35	sample10,sample5,sample42,sample55,sample65,sample51,sample47,sample69,sample54,sample32,sample46,sample31,sample3,sample48,sample49,sample17,sample68,sample76,sample58,sample28,sample59,sample64,sample44,sample29,sample35,sample40,sample9,sample63,sample73,sample77,sample66,sample61,sample6,sample37,sample36
chr21	30567952	30569986	3.19009	1.42617	2.23682	5.24291e-15	7.91453e-13	27	sample10,sample45,sample33,sample1,sample2,sample51,sample47,sample46,sample31,sample48,sample75,sample49,sample34,sample58,sample16,sample64,sample44,sample35,sample40,sample50,sample9,sample73,sample77,sample60,sample6,sample37,sample36
chr2	114038225	114048240	5.85147	2.10414	2.78094	5.27714e-15	7.90422e-13	50	sample43,sample10,sample5,sample42,sample33,sample1,sample55,sample2,sample65,sample51,sample47,sample69,sample54,sample32,sample31,sample3,sample48,sample75,sample39,sample7,sample62,sample49,sample17,sample34,sample30,sample76,sample58,sample28,sample26,sample74,sample59,sample56,sample72,sample64,sample44,sample29,sample35,sample18,sample40,sample50,sample9,sample63,sample73,sample53,sample77,…
chr9	67292456	67294443	5.9078	1.76387	3.34935	5.47691e-15	8.14008e-13	31	sample10,sample5,sample42,sample45,sample1,sample2,sample23,sample51,sample32,sample46,sample48,sample75,sample62,sample49,sample68,sample30,sample76,sample59,sample44,sample29,sample35,sample18,sample40,sample50,sample9,sample63,sample53,sample77,sample66,sample61,sample6
chr9	117480590	117484462	2.06003	0.57617	3.57538	5.5208e-15	8.14244e-13	32	sample43,sample5,sample33,sample1,sample55,sample65,sample47,sample69,sample75,sample62,sample49,sample17,sample76,sample58,sample74,sample70,sample56,sample72,sample64,sample44,sample29,sample35,sample18,sample40,sample50,sample9,sample63,sample73,sample77,sample61,sample6,sample36
chr12	76103387	76108927	1.91633	0.294832	6.49974	5.75571e-15	8.4565e-13	28	sample10,sample33,sample1,sample2,sample65,sample51,sample47,sample69,sample54,sample46,sample31,sample48,sample62,sample49,sample34,sample30,sample58,sample64,sample44,sample29,sample35,sample9,sample63,sample73,sample61,sample6,sample37,sample36
chr6	64237156	64238924	2.63707	1.07501	2.45306	5.77466e-15	8.45209e-13	24	sample5,sample42,sample4,sample65,sample47,sample69,sample31,sample48,sample62,sample17,sample76,sample28,sample56,sample64,sample44,sample29,sample35,sample40,sample50,sample63,sample66,sample61,sample6,sample36
chr12	125070301	125074124	2.2354	1.1393	1.96209	5.94635e-15	8.67041e-13	23	sample10,sample5,sample69,sample31,sample48,sample62,sample49,sample17,sample30,sample76,sample58,sample64,sample44,sample35,sample40,sample9,sample73,sample53,sample77,sample66,sample61,sample6,sample36
chr14	54717536	54721259	1.80533	0.267793	6.74152	5.99913e-15	8.71436e-13	21	sample10,sample33,sample1,sample51,sample69,sample54,sample31,sample48,sample7,sample49,sample17,sample76,sample58,sample35,sample18,sample50,sample9,sample63,sample53,sample77,sample36
chr6	110212877	110216245	2.74047	1.11152	2.46553	6.17009e-15	8.89556e-13	32	sample10,sample42,sample33,sample1,sample2,sample65,sample51,sample47,sample69,sample54,sample32,sample31,sample48,sample75,sample49,sample17,sample58,sample28,sample74,sample72,sample64,sample44,sample35,sample40,sample50,sample9,sample73,sample53,sample77,sample66,sample37,sample36
chr19	48900798	48903844	4.87395	2.01567	2.41804	6.18364e-15	8.88183e-13	43	sample10,sample5,sample42,sample33,sample1,sample55,sample2,sample65,sample23,sample51,sample47,sample69,sample54,sample32,sample31,sample3,sample48,sample75,sample39,sample62,sample49,sample17,sample34,sample79,sample30,sample58,sample28,sample74,sample70,sample59,sample72,sample64,sample35,sample18,sample40,sample9,sample63,sample53,sample77,sample66,sample6,sample37,sample36
chr9	19160544	19164091	3.28374	1.5197	2.16078	6.57675e-15	9.41135e-13	41	sample10,sample5,sample33,sample1,sample55,sample65,sample51,sample47,sample69,sample32,sample46,sample31,sample3,sample48,sample75,sample39,sample7,sample62,sample17,sample68,sample76,sample58,sample74,sample59,sample56,sample72,sample64,sample44,sample35,sample18,sample40,sample50,sample9,sample73,sample53,sample77,sample66,sample60,sample6,sample37,sample36
chr17	57859231	57871612	4.80209	2.40868	1.99366	6.76341e-15	9.64262e-13	39	sample80,sample10,sample5,sample42,sample45,sample67,sample1,sample55,sample2,sample51,sample47,sample32,sample31,sample3,sample48,sample75,sample62,sample49,sample17,sample34,sample30,sample76,sample28,sample26,sample59,sample16,sample64,sample44,sample35,sample18,sample40,sample50,sample73,sample53,sample77,sample60,sample61,sample37,sample36
chr12	76157409	76162397	1.63057	0.238039	6.85002	6.95026e-15	9.80012e-13	29	sample10,sample5,sample33,sample1,sample51,sample47,sample69,sample54,sample46,sample31,sample48,sample75,sample62,sample49,sample30,sample58,sample74,sample64,sample29,sample35,sample50,sample9,sample73,sample53,sample66,sample61,sample6,sample37,sample36
chr8	67471183	67474381	1.96767	0.447133	4.40064	7.09866e-15	9.97283e-13	30	sample80,sample10,sample5,sample1,sample55,sample23,sample51,sample47,sample69,sample48,sample75,sample7,sample62,sample17,sample68,sample30,sample76,sample56,sample72,sample16,sample64,sample44,sample35,sample40,sample50,sample63,sample77,sample66,sample6,sample36
chr5	140903718	140906125	3.22272	1.56083	2.06475	7.15464e-15	1.00149e-12	30	sample33,sample51,sample47,sample69,sample32,sample31,sample3,sample48,sample75,sample62,sample49,sample17,sample30,sample76,sample58,sample28,sample56,sample72,sample16,sample64,sample44,sample18,sample40,sample9,sample73,sample53,sample77,sample66,sample60,sample36
chr1	207910548	207912627	1.83769	0.298853	6.14915	7.26281e-15	1.00929e-12	20	sample1,sample2,sample65,sample51,sample47,sample69,sample54,sample48,sample75,sample49,sample17,sample58,sample70,sample29,sample35,sample63,sample77,sample66,sample6,sample36
chr2	39693519	39697503	3.50856	1.52036	2.30772	7.37604e-15	1.02134e-12	41	sample10,sample5,sample42,sample1,sample55,sample4,sample65,sample51,sample47,sample69,sample54,sample46,sample31,sample3,sample48,sample75,sample62,sample17,sample68,sample30,sample76,sample58,sample28,sample70,sample59,sample56,sample72,sample64,sample44,sample29,sample35,sample40,sample50,sample9,sample63,sample73,sample53,sample77,sample6,sample37,sample36
chr10	61724499	61726950	2.09683	0.546292	3.83829	7.5538e-15	1.04221e-12	29	sample5,sample33,sample1,sample2,sample51,sample47,sample54,sample46,sample31,sample48,sample62,sample49,sample17,sample30,sample76,sample58,sample74,sample72,sample64,sample29,sample35,sample40,sample9,sample63,sample73,sample77,sample66,sample61,sample36
chr12	79941038	79942389	2.77625	1.29185	2.14905	7.64914e-15	1.05159e-12	24	sample10,sample5,sample33,sample1,sample51,sample69,sample31,sample48,sample75,sample62,sample49,sample76,sample58,sample64,sample44,sample35,sample40,sample50,sample9,sample63,sample77,sample6,sample37,sample36
chr2	223573703	223575132	2.56543	0.907136	2.82805	7.72657e-15	1.05846e-12	26	sample10,sample33,sample1,sample65,sample51,sample47,sample69,sample31,sample48,sample75,sample62,sample49,sample17,sample58,sample56,sample72,sample64,sample35,sample18,sample40,sample50,sample73,sample53,sample77,sample6,sample36
chr6	108181219	108182119	2.67528	0.811934	3.29495	7.91109e-15	1.07989e-12	17	sample65,sample54,sample31,sample75,sample49,sample17,sample30,sample76,sample70,sample59,sample72,sample64,sample40,sample9,sample63,sample73,sample77
chr13	29327482	29329777	3.55393	1.50381	2.36329	8.07802e-15	1.09491e-12	28	sample67,sample1,sample47,sample69,sample32,sample48,sample75,sample49,sample17,sample68,sample76,sample58,sample56,sample72,sample64,sample44,sample35,sample18,sample40,sample50,sample9,sample63,sample53,sample77,sample66,sample60,sample6,sample36
chr11	63397987	63399946	2.96316	1.07222	2.76357	8.15431e-15	1.10137e-12	33	sample10,sample33,sample1,sample55,sample2,sample51,sample47,sample69,sample54,sample32,sample46,sample31,sample48,sample75,sample62,sample49,sample17,sample30,sample58,sample28,sample70,sample59,sample56,sample64,sample44,sample18,sample40,sample9,sample63,sample73,sample77,sample6,sample36
chr1	228965816	228967245	2.85824	1.15869	2.46678	8.17903e-15	1.10085e-12	29	sample5,sample1,sample65,sample51,sample47,sample69,sample54,sample46,sample31,sample48,sample62,sample49,sample17,sample76,sample58,sample70,sample56,sample72,sample64,sample44,sample35,sample18,sample40,sample9,sample63,sample77,sample66,sample6,sample36
chr9	6238680	6239882	3.6924	0.622568	5.93092	8.29661e-15	1.11279e-12	14	sample5,sample55,sample32,sample46,sample17,sample68,sample30,sample76,sample59,sample29,sample53,sample66,sample61,sample6
chr3	172390244	172392216	2.11818	0.936365	2.26213	8.32086e-15	1.11216e-12	18	sample33,sample1,sample2,sample51,sample69,sample54,sample31,sample49,sample68,sample58,sample59,sample64,sample40,sample9,sample63,sample73,sample37,sample36
chr2	46455915	46458003	3.31333	1.1667	2.8399	8.34758e-15	1.11187e-12	37	sample10,sample5,sample42,sample33,sample1,sample2,sample65,sample47,sample69,sample32,sample46,sample31,sample3,sample48,sample75,sample39,sample62,sample17,sample30,sample74,sample56,sample72,sample64,sample44,sample35,sample40,sample50,sample9,sample63,sample53,sample77,sample66,sample60,sample61,sample6,sample37,sample36
chr19	1176773	1184753	3.43617	1.94456	1.76707	8.39701e-15	1.1146e-12	42	sample10,sample5,sample45,sample33,sample1,sample55,sample4,sample2,sample51,sample47,sample69,sample54,sample46,sample3,sample48,sample75,sample39,sample7,sample62,sample17,sample34,sample58,sample28,sample26,sample74,sample70,sample59,sample56,sample16,sample64,sample44,sample18,sample50,sample9,sample73,sample53,sample77,sample60,sample61,sample6,sample37,sample36
chr6	30743654	30752903	4.60807	2.72519	1.69092	8.45356e-15	1.11825e-12	30	sample10,sample67,sample55,sample51,sample47,sample32,sample75,sample62,sample49,sample17,sample34,sample76,sample58,sample28,sample26,sample59,sample56,sample72,sample64,sample35,sample40,sample63,sample73,sample53,sample77,sample38,sample66,sample6,sample37,sample36
chr1	67008163	67009830	2.0333	0.79309	2.56377	8.4701e-15	1.1166e-12	18	sample1,sample65,sample47,sample69,sample46,sample31,sample62,sample49,sample17,sample76,sample58,sample64,sample35,sample50,sample77,sample61,sample6,sample36
chr4	10830159	10831157	3.40289	0.441301	7.71105	8.52753e-15	1.12034e-12	38	sample10,sample1,sample4,sample51,sample47,sample69,sample54,sample32,sample46,sample31,sample48,sample75,sample62,sample49,sample17,sample68,sample34,sample30,sample58,sample28,sample26,sample70,sample59,sample56,sample72,sample64,sample44,sample29,sample35,sample18,sample40,sample9,sample63,sample53,sample77,sample66,sample6,sample36
chr17	57838069	57840490	2.3082	1.2657	1.82365	8.53379e-15	1.11735e-12	20	sample10,sample5,sample2,sample46,sample48,sample75,sample7,sample49,sample17,sample34,sample76,sample16,sample64,sample44,sample18,sample50,sample53,sample77,sample60,sample36
chr2	228270017	228272970	2.71964	1.17984	2.3051	8.75755e-15	1.13506e-12	34	sample10,sample5,sample4,sample2,sample65,sample51,sample47,sample69,sample54,sample32,sample31,sample62,sample49,sample17,sample34,sample30,sample58,sample28,sample59,sample56,sample72,sample64,sample44,sample18,sample40,sample50,sample9,sample63,sample73,sample53,sample77,sample66,sample6,sample36
chr15	70799511	70802467	2.35482	0.629598	3.74019	9.20226e-15	1.18472e-12	19	sample10,sample33,sample2,sample47,sample31,sample48,sample75,sample49,sample17,sample34,sample30,sample58,sample72,sample35,sample40,sample63,sample77,sample66,sample36
chr2	27928309	27930085	4.31661	2.19202	1.96924	9.26332e-15	1.18861e-12	30	sample10,sample33,sample1,sample55,sample2,sample51,sample47,sample69,sample31,sample3,sample48,sample75,sample62,sample17,sample34,sample58,sample28,sample59,sample56,sample72,sample64,sample35,sample40,sample9,sample63,sample73,sample53,sample77,sample6,sample36
chr9	92145310	92148723	2.5727	0.944233	2.72464	9.40947e-15	1.19936e-12	27	sample1,sample65,sample51,sample47,sample31,sample48,sample75,sample49,sample17,sample30,sample76,sample58,sample70,sample56,sample72,sample64,sample44,sample29,sample35,sample40,sample50,sample9,sample63,sample53,sample77,sample6,sample36
chr21	34782617	34792679	3.50273	1.93646	1.80883	9.42694e-15	1.19763e-12	42	sample10,sample5,sample42,sample33,sample1,sample55,sample2,sample65,sample51,sample47,sample54,sample32,sample46,sample31,sample3,sample48,sample75,sample62,sample49,sample17,sample30,sample76,sample58,sample28,sample74,sample70,sample59,sample72,sample64,sample44,sample29,sample35,sample18,sample40,sample9,sample73,sample53,sample77,sample66,sample61,sample37,sample36
chr2	62530034	62536469	5.51068	2.96338	1.85959	9.62705e-15	1.21503e-12	34	sample10,sample5,sample45,sample1,sample55,sample4,sample2,sample51,sample47,sample32,sample31,sample3,sample48,sample75,sample7,sample62,sample17,sample34,sample79,sample28,sample70,sample59,sample72,sample64,sample35,sample9,sample73,sample53,sample77,sample38,sample66,sample60,sample37,sample36
chr3	10244032	10249157	3.28936	1.86069	1.76782	9.79037e-15	1.22759e-12	31	sample10,sample5,sample67,sample33,sample1,sample2,sample47,sample46,sample31,sample48,sample75,sample39,sample62,sample34,sample30,sample58,sample74,sample72,sample64,sample44,sample29,sample35,sample18,sample9,sample63,sample73,sample77,sample60,sample6,sample37,sample36
chr17	46079174	46081043	3.2976	1.46539	2.25033	9.88385e-15	1.23529e-12	29	sample10,sample5,sample1,sample2,sample51,sample47,sample69,sample46,sample31,sample48,sample75,sample39,sample7,sample49,sample34,sample76,sample56,sample16,sample64,sample44,sample29,sample35,sample18,sample50,sample9,sample73,sample77,sample60,sample36
chr1	172955400	172956908	2.89998	0.899381	3.22442	1.03403e-14	1.28816e-12	39	sample42,sample33,sample1,sample4,sample2,sample65,sample51,sample47,sample69,sample54,sample32,sample46,sample31,sample48,sample75,sample62,sample49,sample17,sample76,sample58,sample74,sample59,sample56,sample72,sample64,sample44,sample29,sample35,sample18,sample40,sample50,sample9,sample63,sample73,sample53,sample77,sample6,sample37,sample36
chr19	42991059	42994727	1.91925	0.338858	5.66387	1.05872e-14	1.31466e-12	26	sample5,sample55,sample65,sample51,sample47,sample69,sample54,sample46,sample31,sample75,sample62,sample49,sample17,sample58,sample74,sample64,sample35,sample40,sample9,sample63,sample73,sample66,sample61,sample6,sample37,sample36
chr22	30194001	30196284	3.14167	1.8025	1.74296	1.08765e-14	1.34623e-12	22	sample10,sample5,sample2,sample51,sample69,sample54,sample31,sample48,sample75,sample7,sample62,sample17,sample34,sample58,sample74,sample72,sample18,sample50,sample9,sample73,sample77,sample66
chr1	9221206	9227860	4.24665	1.96715	2.15878	1.10235e-14	1.35572e-12	35	sample80,sample10,sample45,sample1,sample55,sample2,sample65,sample23,sample47,sample31,sample48,sample75,sample39,sample62,sample49,sample17,sample34,sample76,sample58,sample28,sample26,sample74,sample59,sample64,sample44,sample35,sample18,sample50,sample9,sample63,sample73,sample53,sample77,sample66,sample36
chr2	110315869	110317101	2.3208	1.17423	1.97645	1.1043e-14	1.35379e-12	19	sample5,sample51,sample47,sample69,sample32,sample31,sample48,sample75,sample17,sample58,sample56,sample72,sample64,sample9,sample77,sample66,sample61,sample6,sample36
chr1	155862497	155864357	2.34239	1.06181	2.20604	1.11076e-14	1.35738e-12	19	sample10,sample2,sample65,sample47,sample69,sample32,sample46,sample31,sample48,sample75,sample49,sample30,sample76,sample56,sample64,sample35,sample50,sample63,sample36
chr3	34224211	34228390	2.47014	0.425014	5.81191	1.12124e-14	1.36585e-12	31	sample10,sample1,sample65,sample51,sample47,sample69,sample32,sample46,sample31,sample48,sample75,sample62,sample49,sample17,sample76,sample58,sample74,sample56,sample72,sample64,sample44,sample35,sample40,sample50,sample9,sample63,sample73,sample66,sample6,sample37,sample36
chr5	174804041	174806543	1.68023	0.403412	4.16504	1.13041e-14	1.37268e-12	15	sample33,sample1,sample47,sample69,sample31,sample48,sample62,sample17,sample58,sample64,sample44,sample35,sample73,sample77,sample36
chr6	137310749	137311887	3.16579	0.7141	4.43326	1.13387e-14	1.37255e-12	33	sample10,sample42,sample33,sample1,sample65,sample51,sample69,sample54,sample31,sample3,sample48,sample75,sample49,sample17,sample68,sample30,sample76,sample26,sample74,sample70,sample59,sample72,sample64,sample44,sample29,sample40,sample50,sample9,sample63,sample77,sample66,sample61,sample6
chr8	145992431	145994677	4.73389	1.65932	2.85292	1.19745e-14	1.42708e-12	45	sample80,sample10,sample27,sample5,sample42,sample33,sample1,sample55,sample4,sample2,sample65,sample51,sample47,sample69,sample31,sample48,sample75,sample39,sample7,sample62,sample49,sample17,sample68,sample76,sample58,sample26,sample74,sample56,sample72,sample64,sample44,sample29,sample35,sample18,sample40,sample50,sample9,sample63,sample53,sample77,sample38,sample60,sample61,sample6,sample36
chr20	48875703	48878126	4.04761	1.91102	2.11803	1.24346e-14	1.47279e-12	31	sample43,sample10,sample5,sample1,sample2,sample47,sample69,sample32,sample48,sample75,sample39,sample62,sample49,sample34,sample58,sample74,sample56,sample72,sample16,sample64,sample35,sample18,sample40,sample50,sample63,sample73,sample53,sample77,sample66,sample61,sample36
chr1	146638899	146640121	2.15246	1.06846	2.01454	1.24523e-14	1.47037e-12	15	sample45,sample33,sample51,sample47,sample48,sample7,sample49,sample17,sample68,sample34,sample35,sample18,sample77,sample60,sample6
chr21	33835290	33837142	1.95666	0.527083	3.71225	1.27609e-14	1.5022e-12	16	sample1,sample55,sample2,sample65,sample46,sample48,sample75,sample49,sample17,sample76,sample64,sample18,sample40,sample63,sample6,sample36
chr9	75139745	75143518	3.42125	1.6778	2.03913	1.28224e-14	1.50483e-12	38	sample10,sample5,sample33,sample1,sample2,sample65,sample51,sample47,sample69,sample46,sample31,sample48,sample75,sample39,sample7,sample62,sample49,sample17,sample34,sample30,sample76,sample26,sample74,sample56,sample64,sample35,sample18,sample40,sample50,sample9,sample73,sample53,sample77,sample66,sample60,sample6,sample37,sample36
chr20	5621522	5639532	4.47748	1.2501	3.5817	1.2844e-14	1.50278e-12	57	sample80,sample43,sample10,sample5,sample42,sample45,sample33,sample55,sample2,sample65,sample23,sample51,sample47,sample69,sample54,sample32,sample46,sample31,sample3,sample48,sample75,sample7,sample62,sample49,sample17,sample68,sample34,sample30,sample76,sample58,sample28,sample26,sample74,sample57,sample70,sample59,sample56,sample72,sample16,sample64,sample44,sample29,sample35,sample18,sample4…
chr3	57434981	57438163	2.10483	0.306452	6.86839	1.28536e-14	1.49935e-12	22	sample1,sample55,sample65,sample51,sample47,sample69,sample31,sample48,sample62,sample49,sample17,sample76,sample74,sample70,sample64,sample40,sample50,sample9,sample63,sample77,sample6,sample36
chr19	41505649	41507330	2.33895	0.421369	5.55084	1.33863e-14	1.55209e-12	21	sample10,sample1,sample47,sample69,sample32,sample75,sample62,sample17,sample76,sample58,sample56,sample72,sample64,sample40,sample50,sample9,sample63,sample73,sample66,sample6,sample36
chr11	35411067	35413554	2.05684	0.692246	2.97125	1.36209e-14	1.57455e-12	21	sample1,sample2,sample65,sample47,sample69,sample31,sample48,sample62,sample49,sample17,sample58,sample28,sample64,sample44,sample29,sample35,sample9,sample73,sample66,sample61,sample36
chr1	245125971	245129100	3.70027	2.01883	1.83287	1.37197e-14	1.57649e-12	26	sample5,sample1,sample2,sample51,sample47,sample69,sample54,sample31,sample48,sample75,sample62,sample49,sample30,sample76,sample26,sample59,sample35,sample18,sample40,sample9,sample73,sample77,sample66,sample6,sample37,sample36
chr12	95490998	95498381	2.74053	1.04376	2.62564	1.41019e-14	1.61079e-12	43	sample27,sample5,sample45,sample33,sample1,sample55,sample4,sample2,sample65,sample51,sample47,sample69,sample54,sample32,sample31,sample48,sample75,sample62,sample49,sample17,sample68,sample34,sample30,sample76,sample58,sample28,sample57,sample70,sample59,sample72,sample64,sample44,sample29,sample18,sample9,sample73,sample53,sample77,sample66,sample61,sample6,sample37,sample36
chr1	152017908	152022241	7.74648	4.70241	1.64734	1.43717e-14	1.63675e-12	15	sample45,sample51,sample54,sample48,sample75,sample62,sample34,sample76,sample58,sample28,sample59,sample35,sample73,sample77,sample36
chr11	129182613	129195722	3.83302	1.59839	2.39805	1.47076e-14	1.66516e-12	46	sample5,sample42,sample45,sample33,sample1,sample55,sample4,sample51,sample47,sample69,sample54,sample32,sample31,sample3,sample48,sample75,sample62,sample49,sample17,sample68,sample34,sample30,sample76,sample58,sample28,sample26,sample70,sample59,sample56,sample72,sample64,sample44,sample29,sample35,sample18,sample40,sample50,sample9,sample63,sample73,sample53,sample77,sample66,sample6,sample37,…
chr7	75471333	75472850	2.7964	1.17721	2.37544	1.58737e-14	1.77629e-12	26	sample10,sample45,sample1,sample2,sample51,sample47,sample69,sample46,sample31,sample48,sample75,sample49,sample17,sample34,sample30,sample58,sample64,sample44,sample29,sample18,sample50,sample9,sample63,sample77,sample66,sample36
chr13	44874500	44877185	2.56074	0.790505	3.23937	1.59186e-14	1.77615e-12	25	sample10,sample33,sample1,sample2,sample65,sample47,sample69,sample54,sample46,sample31,sample48,sample49,sample17,sample30,sample76,sample58,sample16,sample44,sample35,sample18,sample53,sample77,sample60,sample37,sample36
chr9	109678009	109680456	2.40839	1.04123	2.31302	1.61278e-14	1.79428e-12	28	sample10,sample5,sample33,sample1,sample2,sample47,sample69,sample54,sample32,sample46,sample31,sample48,sample62,sample49,sample17,sample30,sample76,sample58,sample74,sample59,sample64,sample44,sample35,sample40,sample50,sample77,sample6,sample36
chr6	67695894	67698300	2.27614	0.631924	3.60192	1.64378e-14	1.81826e-12	26	sample10,sample5,sample42,sample4,sample65,sample51,sample47,sample69,sample54,sample31,sample48,sample62,sample68,sample30,sample76,sample74,sample59,sample64,sample44,sample35,sample40,sample63,sample73,sample61,sample6,sample37
chr14	94493992	94498088	2.94607	0.910616	3.23525	1.64458e-14	1.81394e-12	17	sample10,sample42,sample1,sample55,sample65,sample51,sample3,sample75,sample17,sample74,sample56,sample35,sample18,sample40,sample53,sample66,sample37
chr7	34214459	34215476	2.67611	0.639321	4.18586	1.66968e-14	1.83636e-12	28	sample42,sample1,sample65,sample51,sample47,sample69,sample54,sample31,sample75,sample62,sample49,sample30,sample76,sample58,sample28,sample59,sample56,sample72,sample64,sample44,sample18,sample40,sample9,sample63,sample77,sample66,sample6,sample36
chr7	102629984	102634268	2.90976	1.14382	2.54391	1.69497e-14	1.84833e-12	39	sample10,sample5,sample67,sample33,sample1,sample4,sample2,sample51,sample47,sample69,sample32,sample46,sample31,sample3,sample48,sample62,sample49,sample17,sample68,sample34,sample30,sample76,sample58,sample28,sample59,sample56,sample72,sample64,sample44,sample29,sample35,sample18,sample40,sample9,sample53,sample77,sample66,sample6,sample36
chr19	49054591	49063659	3.21391	1.13634	2.82829	1.71742e-14	1.86753e-12	35	sample10,sample5,sample33,sample1,sample2,sample65,sample51,sample47,sample69,sample54,sample32,sample31,sample48,sample75,sample62,sample49,sample17,sample68,sample76,sample58,sample74,sample70,sample56,sample64,sample44,sample35,sample18,sample40,sample9,sample63,sample73,sample77,sample66,sample6,sample36
chr2	42368345	42370158	2.60306	1.5292	1.70224	1.72088e-14	1.86601e-12	18	sample1,sample2,sample65,sample51,sample47,sample69,sample46,sample48,sample75,sample39,sample7,sample62,sample49,sample17,sample64,sample50,sample77,sample36
chr1	234904110	234909491	4.10027	2.08372	1.96777	1.72403e-14	1.86418e-12	39	sample10,sample45,sample1,sample55,sample2,sample23,sample51,sample47,sample31,sample48,sample75,sample39,sample7,sample62,sample49,sample17,sample34,sample30,sample76,sample58,sample28,sample26,sample59,sample72,sample16,sample64,sample44,sample35,sample18,sample40,sample50,sample9,sample63,sample73,sample53,sample77,sample66,sample61,sample36
chr10	72013887	72017953	2.5892	1.03917	2.4916	1.79243e-14	1.92194e-12	34	sample10,sample67,sample33,sample1,sample55,sample51,sample47,sample69,sample54,sample32,sample31,sample48,sample75,sample62,sample17,sample30,sample76,sample58,sample70,sample59,sample72,sample64,sample44,sample40,sample9,sample63,sample73,sample53,sample77,sample66,sample60,sample61,sample6,sample36
chr2	225349467	225352051	6.0675	3.00414	2.01971	1.81624e-14	1.94207e-12	35	sample10,sample45,sample33,sample1,sample4,sample2,sample51,sample47,sample54,sample31,sample75,sample62,sample49,sample17,sample34,sample79,sample30,sample76,sample58,sample28,sample26,sample74,sample59,sample72,sample64,sample35,sample40,sample9,sample73,sample53,sample77,sample66,sample6,sample37,sample36
chr16	2885157	2888141	5.45767	1.91584	2.8487	1.85775e-14	1.98095e-12	44	sample10,sample5,sample33,sample1,sample55,sample2,sample65,sample51,sample47,sample69,sample32,sample31,sample3,sample48,sample75,sample7,sample62,sample17,sample68,sample34,sample30,sample76,sample58,sample28,sample74,sample59,sample56,sample72,sample64,sample44,sample29,sample35,sample40,sample50,sample9,sample63,sample73,sample53,sample77,sample66,sample61,sample6,sample37,sample36
chr11	102421703	102426334	3.04883	0.647051	4.71189	1.86472e-14	1.98289e-12	40	sample10,sample33,sample1,sample55,sample2,sample65,sample51,sample47,sample69,sample54,sample32,sample46,sample31,sample48,sample75,sample62,sample49,sample17,sample30,sample76,sample58,sample28,sample70,sample59,sample56,sample72,sample64,sample44,sample35,sample18,sample40,sample50,sample9,sample63,sample73,sample53,sample77,sample66,sample37,sample36
chr13	97906912	97913353	2.42133	0.918239	2.63693	1.87369e-14	1.98694e-12	33	sample80,sample10,sample27,sample5,sample33,sample1,sample2,sample65,sample47,sample46,sample31,sample48,sample75,sample49,sample17,sample34,sample30,sample76,sample58,sample74,sample56,sample72,sample16,sample64,sample29,sample35,sample18,sample50,sample9,sample77,sample66,sample60,sample36
chr6	138051942	138056427	2.70288	0.849086	3.18328	1.9021e-14	2.01152e-12	36	sample10,sample5,sample1,sample55,sample2,sample65,sample51,sample47,sample69,sample32,sample31,sample3,sample48,sample62,sample49,sample17,sample68,sample30,sample76,sample58,sample28,sample74,sample59,sample56,sample72,sample64,sample44,sample35,sample40,sample63,sample77,sample66,sample61,sample6,sample37,sample36
chr5	103415311	103416922	2.57684	0.187312	13.7569	1.93296e-14	2.02745e-12	35	sample10,sample5,sample1,sample51,sample47,sample69,sample54,sample31,sample48,sample75,sample62,sample49,sample17,sample68,sample30,sample76,sample58,sample74,sample70,sample59,sample56,sample72,sample64,sample44,sample29,sample35,sample18,sample40,sample50,sample9,sample63,sample73,sample77,sample6,sample36
chr1	183163803	183165012	2.48743	0.956508	2.60053	1.97923e-14	2.07033e-12	17	sample33,sample1,sample65,sample51,sample47,sample69,sample48,sample58,sample56,sample64,sample35,sample40,sample50,sample63,sample77,sample6,sample36
chr4	161046380	161047311	2.7608	0.495347	5.57347	2.04152e-14	2.12971e-12	27	sample10,sample33,sample4,sample2,sample51,sample47,sample54,sample46,sample31,sample75,sample62,sample49,sample30,sample58,sample74,sample59,sample56,sample72,sample64,sample35,sample40,sample9,sample63,sample73,sample77,sample6,sample36
chr2	173892684	173894674	2.17229	0.901293	2.41019	2.08861e-14	2.16709e-12	18	sample5,sample47,sample69,sample46,sample31,sample62,sample49,sample34,sample30,sample76,sample59,sample16,sample64,sample44,sample35,sample50,sample61,sample36
chr12	15780592	15784600	2.65961	0.95643	2.78077	2.14186e-14	2.21043e-12	31	sample10,sample5,sample33,sample1,sample2,sample65,sample51,sample47,sample69,sample54,sample32,sample46,sample31,sample48,sample49,sample17,sample34,sample58,sample28,sample56,sample64,sample44,sample35,sample40,sample50,sample77,sample66,sample61,sample6,sample37,sample36
chr6	158147738	158150504	2.10436	0.493938	4.26038	2.15452e-14	2.21754e-12	29	sample10,sample5,sample1,sample65,sample47,sample69,sample32,sample31,sample75,sample62,sample49,sample17,sample30,sample58,sample28,sample74,sample72,sample64,sample44,sample40,sample50,sample9,sample63,sample53,sample77,sample66,sample61,sample6,sample36
chr14	65702937	65708721	2.90293	0.933835	3.10861	2.1893e-14	2.24135e-12	43	sample10,sample5,sample33,sample1,sample55,sample2,sample51,sample47,sample69,sample54,sample46,sample31,sample3,sample48,sample75,sample39,sample7,sample62,sample49,sample17,sample68,sample34,sample30,sample76,sample58,sample74,sample70,sample59,sample72,sample64,sample29,sample35,sample18,sample40,sample50,sample9,sample63,sample73,sample53,sample77,sample66,sample6,sample36
chr10	75691554	75693071	2.90769	0.739479	3.93208	2.26218e-14	2.29763e-12	23	sample10,sample33,sample1,sample2,sample51,sample47,sample46,sample31,sample48,sample75,sample17,sample30,sample58,sample56,sample72,sample64,sample35,sample50,sample9,sample63,sample77,sample66,sample36
chr11	65046231	65048607	2.62278	1.14357	2.29351	2.29222e-14	2.32202e-12	18	sample10,sample33,sample1,sample2,sample51,sample47,sample69,sample32,sample46,sample31,sample48,sample58,sample64,sample29,sample35,sample9,sample77,sample36
chr22	31638815	31641022	2.41784	1.14022	2.12051	2.37192e-14	2.39017e-12	22	sample10,sample33,sample1,sample2,sample51,sample47,sample48,sample75,sample7,sample17,sample34,sample76,sample58,sample56,sample29,sample35,sample18,sample50,sample9,sample77,sample66,sample36
chr19	49046299	49048241	2.56572	0.600305	4.27402	2.58093e-14	2.55399e-12	28	sample43,sample10,sample33,sample1,sample4,sample2,sample65,sample47,sample69,sample46,sample3,sample62,sample49,sample17,sample76,sample58,sample74,sample70,sample72,sample44,sample35,sample18,sample9,sample63,sample73,sample66,sample6,sample36
chr7	98045418	98050388	4.8696	1.77853	2.73799	2.59638e-14	2.56269e-12	43	sample10,sample5,sample33,sample1,sample4,sample65,sample51,sample47,sample69,sample54,sample32,sample31,sample3,sample75,sample62,sample17,sample68,sample34,sample79,sample58,sample28,sample74,sample70,sample59,sample56,sample72,sample64,sample44,sample29,sample35,sample18,sample40,sample50,sample9,sample63,sample73,sample53,sample77,sample66,sample61,sample6,sample37,sample36
chr3	119880965	119883522	2.20841	0.686694	3.21601	2.62736e-14	2.58664e-12	22	sample5,sample33,sample1,sample51,sample47,sample69,sample46,sample31,sample48,sample75,sample62,sample49,sample30,sample59,sample9,sample63,sample77,sample66,sample61,sample6,sample37,sample36
chr20	49055307	49058575	3.15367	1.42646	2.21084	2.64645e-14	2.59879e-12	26	sample10,sample5,sample33,sample1,sample2,sample47,sample46,sample48,sample7,sample49,sample17,sample76,sample58,sample56,sample72,sample16,sample64,sample44,sample18,sample50,sample53,sample77,sample60,sample6,sample37,sample36
chr9	104114891	104119102	3.19862	1.13891	2.80849	2.74509e-14	2.67518e-12	41	sample8,sample5,sample33,sample1,sample4,sample65,sample51,sample47,sample69,sample54,sample31,sample3,sample48,sample75,sample62,sample49,sample17,sample68,sample30,sample76,sample58,sample28,sample26,sample74,sample70,sample59,sample72,sample64,sample44,sample35,sample40,sample50,sample9,sample73,sample53,sample77,sample66,sample61,sample6,sample37,sample36
chr3	189656814	189663291	3.92388	1.45185	2.70267	2.89931e-14	2.80418e-12	49	sample10,sample5,sample42,sample45,sample67,sample33,sample1,sample4,sample2,sample65,sample51,sample47,sample69,sample54,sample32,sample31,sample3,sample75,sample62,sample49,sample17,sample34,sample79,sample30,sample76,sample58,sample28,sample74,sample70,sample59,sample56,sample72,sample64,sample44,sample29,sample35,sample18,sample40,sample50,sample9,sample63,sample73,sample53,sample77,sample66,…
chr7	129545464	129549427	2.71248	1.0153	2.67161	2.91914e-14	2.81628e-12	39	sample10,sample5,sample1,sample65,sample51,sample47,sample69,sample54,sample32,sample31,sample3,sample48,sample75,sample62,sample49,sample17,sample30,sample76,sample58,sample74,sample70,sample59,sample56,sample72,sample64,sample44,sample29,sample35,sample40,sample9,sample63,sample73,sample53,sample77,sample66,sample61,sample6,sample37,sample36
chr9	69654436	69656397	2.67667	0.952649	2.80971	2.92441e-14	2.8143e-12	25	sample10,sample33,sample1,sample2,sample65,sample47,sample69,sample54,sample46,sample31,sample48,sample17,sample76,sample58,sample59,sample56,sample64,sample44,sample35,sample18,sample50,sample9,sample77,sample61,sample6
chr12	95562357	95564292	2.33612	1.29931	1.79797	2.9273e-14	2.81006e-12	18	sample45,sample33,sample1,sample4,sample2,sample51,sample69,sample54,sample32,sample31,sample30,sample76,sample59,sample29,sample18,sample9,sample77,sample36
chr1	212806433	212812306	2.00601	1.09816	1.8267	2.95074e-14	2.82552e-12	17	sample10,sample5,sample1,sample2,sample65,sample46,sample48,sample75,sample62,sample34,sample44,sample35,sample18,sample50,sample77,sample60,sample36
chr2	27514699	27517314	1.44578	0.327948	4.40856	3.01607e-14	2.87378e-12	20	sample1,sample65,sample51,sample47,sample69,sample46,sample48,sample62,sample17,sample76,sample58,sample74,sample29,sample35,sample9,sample63,sample73,sample66,sample61,sample36
chr3	105716114	105717705	1.88724	0.319024	5.91565	3.04421e-14	2.89343e-12	16	sample10,sample1,sample2,sample48,sample75,sample39,sample7,sample76,sample44,sample35,sample18,sample50,sample9,sample63,sample77,sample36
chr17	80831853	80835516	2.70049	1.04576	2.58233	3.06792e-14	2.90878e-12	31	sample43,sample10,sample5,sample33,sample1,sample55,sample65,sample51,sample69,sample54,sample31,sample48,sample75,sample62,sample17,sample34,sample59,sample56,sample64,sample44,sample35,sample18,sample40,sample9,sample63,sample73,sample77,sample66,sample61,sample6,sample36
chr1	65445898	65449096	2.38375	0.886013	2.69043	3.08463e-14	2.91744e-12	29	sample10,sample33,sample1,sample65,sample51,sample47,sample69,sample54,sample46,sample31,sample62,sample49,sample17,sample30,sample58,sample28,sample59,sample64,sample44,sample35,sample40,sample9,sample63,sample73,sample77,sample66,sample61,sample6,sample36
chr21	36626217	36630175	2.52168	1.06972	2.35734	3.08542e-14	2.91103e-12	31	sample10,sample33,sample1,sample2,sample65,sample51,sample47,sample54,sample32,sample31,sample48,sample75,sample49,sample17,sample34,sample30,sample76,sample58,sample28,sample59,sample64,sample44,sample35,sample18,sample40,sample50,sample9,sample73,sample77,sample66,sample36
chr6	138131999	138133514	2.9296	1.31042	2.23561	3.17919e-14	2.99217e-12	19	sample5,sample45,sample33,sample2,sample47,sample46,sample31,sample48,sample17,sample34,sample30,sample59,sample64,sample44,sample35,sample50,sample77,sample37,sample36
chr5	173389943	173391849	2.87543	1.25833	2.28511	3.22891e-14	3.03155e-12	30	sample10,sample5,sample1,sample4,sample51,sample47,sample69,sample54,sample32,sample31,sample75,sample62,sample49,sample17,sample76,sample59,sample56,sample72,sample64,sample35,sample18,sample40,sample50,sample9,sample63,sample73,sample53,sample77,sample66,sample36
chr20	48649488	48652051	3.19419	1.10768	2.88367	3.28311e-14	3.06748e-12	29	sample10,sample5,sample1,sample55,sample2,sample51,sample47,sample46,sample31,sample48,sample75,sample39,sample7,sample62,sample17,sample76,sample74,sample56,sample72,sample64,sample44,sample35,sample18,sample50,sample53,sample77,sample60,sample61,sample36
chr16	15992766	15994528	2.34342	0.671377	3.49047	3.32146e-14	3.09579e-12	21	sample10,sample33,sample1,sample51,sample47,sample69,sample48,sample62,sample49,sample17,sample76,sample56,sample64,sample50,sample9,sample63,sample73,sample77,sample66,sample6,sample36
chr6	138043123	138046360	2.62425	0.774699	3.38745	3.33823e-14	3.10391e-12	33	sample5,sample42,sample1,sample65,sample51,sample47,sample31,sample48,sample75,sample62,sample49,sample17,sample68,sample30,sample76,sample58,sample56,sample72,sample64,sample44,sample35,sample40,sample50,sample63,sample73,sample53,sample77,sample66,sample60,sample61,sample6,sample37,sample36
chr2	96094532	96097329	4.76828	1.66458	2.86456	3.44903e-14	3.17624e-12	40	sample43,sample10,sample5,sample1,sample65,sample51,sample47,sample69,sample54,sample32,sample31,sample48,sample75,sample62,sample49,sample17,sample30,sample76,sample58,sample28,sample74,sample59,sample56,sample72,sample64,sample44,sample35,sample18,sample40,sample50,sample9,sample63,sample73,sample53,sample77,sample66,sample61,sample6,sample37,sample36
chrX	73461706	73463815	2.06013	0.666095	3.09285	3.45661e-14	3.17563e-12	18	sample1,sample2,sample65,sample47,sample31,sample48,sample75,sample62,sample17,sample76,sample72,sample64,sample35,sample40,sample50,sample63,sample77,sample36
chr16	19118678	19120316	2.34212	0.765168	3.06093	3.48231e-14	3.19162e-12	24	sample10,sample33,sample1,sample2,sample51,sample47,sample69,sample48,sample17,sample76,sample58,sample56,sample72,sample64,sample35,sample18,sample40,sample50,sample9,sample63,sample77,sample66,sample6,sample36
chr4	38530377	38532219	4.08937	2.20041	1.85845	3.50408e-14	3.20394e-12	29	sample43,sample10,sample45,sample1,sample55,sample51,sample47,sample69,sample31,sample3,sample48,sample75,sample62,sample49,sample17,sample34,sample76,sample58,sample28,sample26,sample59,sample72,sample35,sample50,sample9,sample63,sample73,sample77,sample36
chr11	86186659	86189547	2.25166	0.912002	2.46892	3.5256e-14	3.20838e-12	28	sample33,sample1,sample2,sample65,sample51,sample47,sample69,sample32,sample31,sample75,sample62,sample49,sample17,sample30,sample76,sample58,sample72,sample64,sample35,sample18,sample40,sample50,sample9,sample63,sample77,sample66,sample6,sample36
chr1	178020222	178027768	3.13602	1.63191	1.92169	3.56625e-14	3.2301e-12	40	sample10,sample27,sample42,sample45,sample33,sample1,sample65,sample51,sample47,sample69,sample54,sample32,sample46,sample31,sample75,sample39,sample7,sample62,sample17,sample68,sample34,sample79,sample58,sample28,sample70,sample59,sample56,sample72,sample64,sample40,sample50,sample9,sample63,sample73,sample53,sample77,sample66,sample6,sample37,sample36
chr13	107123932	107126524	4.01172	1.02241	3.92378	3.5835e-14	3.23811e-12	41	sample10,sample5,sample33,sample1,sample55,sample2,sample65,sample51,sample47,sample69,sample54,sample3,sample48,sample7,sample62,sample49,sample17,sample76,sample58,sample28,sample74,sample70,sample59,sample56,sample72,sample64,sample44,sample35,sample18,sample40,sample50,sample9,sample63,sample73,sample53,sample77,sample66,sample61,sample6,sample37,sample36
chr4	38237802	38239407	2.46952	1.21589	2.03103	3.645e-14	3.28596e-12	14	sample1,sample51,sample47,sample54,sample75,sample49,sample64,sample35,sample18,sample40,sample50,sample77,sample6,sample36
chr19	48160374	48164354	3.9082	1.97715	1.97668	3.68367e-14	3.30534e-12	36	sample5,sample42,sample33,sample1,sample55,sample4,sample65,sample51,sample47,sample69,sample32,sample31,sample75,sample62,sample49,sample17,sample34,sample58,sample28,sample26,sample74,sample70,sample59,sample56,sample72,sample64,sample35,sample40,sample9,sample73,sample53,sample77,sample66,sample6,sample37,sample36
chr7	138079455	138082290	1.97815	0.343065	5.76612	3.68429e-14	3.29821e-12	27	sample5,sample1,sample65,sample47,sample69,sample31,sample48,sample75,sample62,sample49,sample17,sample30,sample76,sample58,sample74,sample72,sample64,sample44,sample35,sample40,sample9,sample63,sample73,sample66,sample61,sample6,sample36
chr6	35148931	35150368	2.97641	0.81547	3.64993	3.71694e-14	3.31204e-12	31	sample43,sample5,sample33,sample1,sample2,sample51,sample47,sample69,sample46,sample48,sample62,sample49,sample76,sample74,sample59,sample56,sample72,sample64,sample44,sample35,sample18,sample40,sample50,sample9,sample63,sample73,sample66,sample60,sample61,sample6,sample36
chr10	97878551	97879783	3.27038	1.01021	3.23731	3.75379e-14	3.33715e-12	41	sample10,sample5,sample42,sample33,sample1,sample4,sample2,sample51,sample47,sample69,sample54,sample32,sample31,sample48,sample75,sample62,sample49,sample17,sample79,sample30,sample76,sample58,sample28,sample74,sample70,sample59,sample56,sample72,sample64,sample44,sample35,sample40,sample50,sample9,sample63,sample73,sample53,sample77,sample66,sample6,sample36
chr12	12599930	12605695	2.34215	0.942146	2.48597	3.90836e-14	3.44276e-12	36	sample10,sample5,sample1,sample65,sample51,sample47,sample69,sample54,sample32,sample31,sample48,sample75,sample62,sample49,sample17,sample68,sample30,sample76,sample58,sample70,sample59,sample56,sample72,sample64,sample44,sample35,sample40,sample50,sample9,sample63,sample73,sample53,sample77,sample61,sample6,sample36
chr1	60013729	60024583	2.19086	0.553902	3.95533	3.99258e-14	3.50891e-12	40	sample43,sample10,sample5,sample1,sample55,sample65,sample51,sample47,sample69,sample54,sample32,sample46,sample31,sample48,sample75,sample62,sample49,sample17,sample30,sample76,sample58,sample28,sample70,sample59,sample56,sample72,sample64,sample44,sample35,sample40,sample50,sample9,sample63,sample73,sample53,sample77,sample66,sample61,sample6,sample36
chr8	39975679	39977815	2.37102	0.950609	2.49422	4.04598e-14	3.54774e-12	21	sample5,sample33,sample1,sample2,sample47,sample69,sample31,sample48,sample75,sample62,sample76,sample58,sample64,sample44,sample35,sample18,sample73,sample77,sample66,sample60,sample36
chr6	6823378	6827520	2.96692	1.16235	2.55251	4.06233e-14	3.55398e-12	27	sample10,sample1,sample2,sample51,sample47,sample69,sample54,sample46,sample31,sample48,sample62,sample49,sample17,sample58,sample28,sample74,sample56,sample72,sample64,sample44,sample29,sample35,sample9,sample53,sample77,sample66,sample36
chr6	1053955	1058567	3.7417	0.367898	10.1705	4.06458e-14	3.54789e-12	44	sample43,sample10,sample5,sample1,sample2,sample65,sample51,sample47,sample69,sample54,sample46,sample31,sample3,sample48,sample75,sample62,sample49,sample17,sample34,sample30,sample76,sample58,sample26,sample74,sample70,sample59,sample56,sample72,sample64,sample44,sample35,sample18,sample40,sample50,sample9,sample63,sample73,sample53,sample77,sample66,sample61,sample6,sample37,sample36
chr2	203050707	203054275	2.35529	0.495046	4.75771	4.06672e-14	3.54172e-12	33	sample5,sample33,sample1,sample2,sample65,sample51,sample47,sample69,sample46,sample31,sample48,sample75,sample62,sample49,sample17,sample30,sample76,sample74,sample59,sample56,sample72,sample64,sample35,sample50,sample9,sample63,sample73,sample53,sample77,sample66,sample61,sample6,sample36
chr17	70393829	70413407	3.49313	1.3997	2.49563	4.12278e-14	3.58244e-12	49	sample10,sample27,sample5,sample42,sample33,sample1,sample2,sample65,sample51,sample47,sample69,sample54,sample32,sample46,sample31,sample3,sample48,sample75,sample62,sample49,sample17,sample68,sample34,sample30,sample76,sample58,sample28,sample26,sample70,sample59,sample56,sample72,sample64,sample44,sample29,sample35,sample18,sample40,sample50,sample9,sample63,sample73,sample53,sample77,sample66…
chr3	129131428	129133303	2.48113	0.862032	2.87823	4.18393e-14	3.62739e-12	14	sample5,sample33,sample1,sample51,sample47,sample31,sample48,sample30,sample70,sample64,sample29,sample18,sample9,sample77
chr7	26034216	26037623	2.34287	0.449023	5.2177	4.3839e-14	3.78371e-12	30	sample10,sample5,sample1,sample4,sample65,sample51,sample47,sample69,sample54,sample31,sample75,sample62,sample49,sample17,sample30,sample76,sample58,sample70,sample59,sample72,sample64,sample40,sample50,sample9,sample63,sample73,sample66,sample6,sample37,sample36
chr8	52944478	52946963	3.40706	0.955223	3.56676	4.45246e-14	3.8343e-12	37	sample10,sample5,sample1,sample4,sample65,sample23,sample51,sample47,sample69,sample54,sample32,sample31,sample75,sample62,sample49,sample17,sample68,sample30,sample76,sample58,sample74,sample72,sample64,sample44,sample35,sample40,sample50,sample9,sample63,sample73,sample53,sample77,sample66,sample61,sample6,sample37,sample36
chr12	101996045	102003920	3.34355	1.41391	2.36475	4.55174e-14	3.90233e-12	48	sample43,sample5,sample45,sample67,sample33,sample1,sample4,sample2,sample65,sample51,sample47,sample69,sample54,sample32,sample46,sample31,sample48,sample75,sample62,sample49,sample17,sample68,sample34,sample30,sample58,sample28,sample74,sample70,sample59,sample56,sample72,sample64,sample44,sample29,sample35,sample18,sample40,sample50,sample9,sample63,sample73,sample53,sample77,sample66,sample61…
chr4	85964529	85965716	2.96611	1.06221	2.7924	4.6563e-14	3.9831e-12	26	sample33,sample1,sample2,sample51,sample47,sample69,sample46,sample31,sample48,sample75,sample62,sample49,sample17,sample68,sample58,sample72,sample64,sample29,sample35,sample40,sample9,sample63,sample77,sample6,sample37,sample36
chr3	107854779	107857063	2.61847	0.529319	4.94687	4.67213e-14	3.98778e-12	34	sample33,sample1,sample55,sample2,sample65,sample47,sample69,sample54,sample46,sample31,sample48,sample75,sample62,sample49,sample30,sample76,sample58,sample28,sample26,sample74,sample59,sample56,sample64,sample35,sample40,sample50,sample9,sample63,sample73,sample53,sample77,sample66,sample37,sample36
chr11	18551738	18553161	2.3862	0.585109	4.07821	4.70565e-14	4.0075e-12	29	sample10,sample1,sample2,sample65,sample51,sample47,sample69,sample54,sample31,sample48,sample17,sample68,sample30,sample58,sample28,sample59,sample56,sample72,sample64,sample44,sample35,sample40,sample50,sample9,sample63,sample77,sample66,sample6,sample36
chr12	101444028	101447404	2.73329	1.20139	2.27511	4.76334e-14	4.04769e-12	34	sample5,sample42,sample45,sample1,sample4,sample65,sample51,sample47,sample69,sample54,sample32,sample46,sample31,sample75,sample62,sample49,sample30,sample76,sample58,sample28,sample59,sample56,sample64,sample44,sample29,sample35,sample40,sample50,sample9,sample73,sample77,sample61,sample37,sample36
chr2	113568954	113570556	2.71845	1.08554	2.50425	4.76605e-14	4.04107e-12	20	sample43,sample10,sample2,sample51,sample47,sample32,sample48,sample75,sample58,sample56,sample72,sample64,sample18,sample50,sample9,sample77,sample66,sample61,sample37,sample36
chr10	31387632	31391537	2.61605	0.766188	3.41437	4.82858e-14	4.08509e-12	40	sample10,sample42,sample33,sample1,sample55,sample2,sample65,sample51,sample47,sample69,sample54,sample46,sample31,sample48,sample75,sample62,sample49,sample17,sample34,sample76,sample58,sample28,sample59,sample56,sample64,sample44,sample29,sample35,sample18,sample40,sample50,sample9,sample63,sample73,sample53,sample77,sample66,sample61,sample6,sample36
chr2	162945551	162950171	2.2828	1.08387	2.10617	5.04605e-14	4.2411e-12	32	sample10,sample5,sample33,sample1,sample2,sample65,sample51,sample47,sample69,sample31,sample62,sample49,sample17,sample68,sample30,sample76,sample58,sample26,sample64,sample44,sample29,sample35,sample18,sample40,sample9,sample73,sample53,sample77,sample66,sample61,sample6,sample36
chr5	90457573	90459878	3.87206	1.7944	2.15786	5.15701e-14	4.32492e-12	31	sample10,sample67,sample1,sample4,sample2,sample51,sample47,sample69,sample31,sample3,sample48,sample75,sample39,sample62,sample17,sample34,sample30,sample76,sample58,sample28,sample59,sample64,sample44,sample35,sample18,sample50,sample73,sample53,sample77,sample60,sample36
chr7	26039363	26047654	1.89219	0.458883	4.12347	5.20706e-14	4.34795e-12	33	sample1,sample55,sample4,sample51,sample47,sample69,sample54,sample31,sample3,sample48,sample62,sample49,sample17,sample30,sample76,sample58,sample70,sample72,sample64,sample44,sample35,sample40,sample50,sample9,sample63,sample73,sample53,sample77,sample66,sample61,sample6,sample37,sample36
chr11	75244210	75246983	3.17611	1.05462	3.01161	5.28221e-14	4.40115e-12	39	sample10,sample5,sample42,sample1,sample55,sample65,sample51,sample47,sample69,sample54,sample32,sample46,sample31,sample3,sample75,sample62,sample17,sample68,sample34,sample30,sample76,sample58,sample74,sample59,sample56,sample72,sample64,sample44,sample29,sample35,sample40,sample50,sample9,sample63,sample73,sample66,sample6,sample37,sample36
chr17	76586785	76589528	2.92737	1.24827	2.34514	5.34473e-14	4.44363e-12	38	sample10,sample5,sample42,sample33,sample1,sample2,sample65,sample47,sample69,sample31,sample3,sample48,sample75,sample7,sample62,sample49,sample17,sample68,sample34,sample76,sample58,sample56,sample72,sample64,sample44,sample35,sample18,sample50,sample9,sample63,sample73,sample53,sample77,sample66,sample60,sample61,sample6,sample36
chr16	68674312	68675771	2.56183	0.485159	5.28039	5.44181e-14	4.50488e-12	19	sample10,sample33,sample1,sample51,sample47,sample31,sample48,sample7,sample17,sample76,sample56,sample72,sample18,sample9,sample63,sample77,sample66,sample6,sample36
chr17	70710279	70713866	1.74111	0.426281	4.08442	5.51584e-14	4.55637e-12	21	sample10,sample5,sample33,sample1,sample2,sample65,sample51,sample54,sample31,sample48,sample75,sample49,sample17,sample34,sample58,sample28,sample35,sample18,sample9,sample77,sample36
chr13	73662668	73666372	6.03811	1.97426	3.05841	5.54349e-14	4.55964e-12	47	sample10,sample5,sample42,sample45,sample67,sample33,sample1,sample55,sample4,sample65,sample51,sample47,sample69,sample54,sample32,sample31,sample3,sample75,sample62,sample49,sample17,sample68,sample30,sample76,sample58,sample28,sample74,sample70,sample59,sample56,sample72,sample64,sample44,sample29,sample35,sample18,sample40,sample50,sample9,sample63,sample73,sample53,sample77,sample66,sample6,…
chr3	30624579	30627740	1.75557	0.462423	3.79645	5.55187e-14	4.5471e-12	25	sample33,sample1,sample65,sample51,sample47,sample69,sample54,sample31,sample48,sample62,sample49,sample17,sample30,sample76,sample58,sample70,sample59,sample64,sample35,sample40,sample9,sample63,sample77,sample6,sample36
chr1	247563595	247566910	1.75869	0.619829	2.83738	5.60329e-14	4.57947e-12	20	sample2,sample51,sample47,sample69,sample54,sample46,sample31,sample48,sample62,sample49,sample68,sample59,sample64,sample35,sample40,sample50,sample9,sample77,sample6,sample36
chr3	187607395	187608692	3.57297	0.817014	4.37321	5.66689e-14	4.62164e-12	34	sample10,sample33,sample1,sample4,sample2,sample51,sample47,sample69,sample54,sample46,sample75,sample62,sample49,sample17,sample58,sample28,sample74,sample70,sample59,sample56,sample72,sample64,sample44,sample35,sample18,sample40,sample50,sample9,sample63,sample73,sample77,sample6,sample37,sample36
chr12	52557514	52559735	1.92872	0.936731	2.05899	6.0218e-14	4.84944e-12	16	sample10,sample33,sample1,sample2,sample51,sample47,sample48,sample75,sample17,sample68,sample34,sample76,sample58,sample59,sample9,sample36
chr6	37391393	37392309	2.11732	0.36001	5.88128	6.07221e-14	4.87982e-12	15	sample10,sample1,sample51,sample47,sample31,sample75,sample62,sample17,sample59,sample64,sample9,sample63,sample53,sample77,sample36
chr6	3869563	3871428	2.90986	0.948089	3.06918	6.10367e-14	4.89489e-12	30	sample5,sample33,sample2,sample51,sample47,sample69,sample54,sample32,sample46,sample31,sample48,sample62,sample17,sample58,sample59,sample72,sample64,sample44,sample35,sample40,sample50,sample9,sample63,sample53,sample77,sample66,sample61,sample6,sample37,sample36
chr21	18870790	18876365	2.05199	0.588252	3.48828	6.11555e-14	4.89422e-12	32	sample1,sample65,sample51,sample47,sample69,sample54,sample32,sample31,sample48,sample75,sample17,sample68,sample30,sample76,sample58,sample59,sample56,sample72,sample64,sample44,sample35,sample18,sample40,sample50,sample9,sample63,sample73,sample53,sample66,sample6,sample37,sample36
chr16	21637300	21638817	2.27994	0.804743	2.83313	6.34477e-14	5.05664e-12	15	sample10,sample1,sample2,sample65,sample47,sample31,sample48,sample17,sample76,sample64,sample35,sample9,sample77,sample6,sample36
chr7	30588666	30591819	2.91207	1.09019	2.67116	6.35545e-14	5.05468e-12	36	sample10,sample42,sample1,sample55,sample65,sample51,sample47,sample69,sample54,sample46,sample31,sample48,sample75,sample62,sample17,sample34,sample76,sample28,sample26,sample74,sample56,sample72,sample64,sample44,sample29,sample35,sample18,sample40,sample50,sample9,sample73,sample77,sample66,sample6,sample37,sample36
chr8	30356593	30362807	3.80683	1.8397	2.06927	6.457e-14	5.11431e-12	40	sample80,sample10,sample42,sample33,sample1,sample23,sample51,sample47,sample69,sample54,sample46,sample31,sample3,sample48,sample75,sample39,sample62,sample49,sample34,sample79,sample30,sample76,sample58,sample28,sample26,sample70,sample56,sample16,sample64,sample44,sample35,sample40,sample50,sample9,sample73,sample53,sample77,sample6,sample37,sample36
chr5	173928212	173934551	2.2687	0.296229	7.65859	6.48642e-14	5.12707e-12	34	sample10,sample5,sample33,sample1,sample2,sample65,sample51,sample47,sample69,sample54,sample31,sample48,sample62,sample49,sample17,sample30,sample76,sample58,sample28,sample70,sample59,sample56,sample72,sample64,sample29,sample35,sample18,sample40,sample50,sample9,sample73,sample77,sample66,sample36
chr8	101879656	101883011	3.2732	0.61741	5.30151	6.51131e-14	5.13619e-12	31	sample43,sample5,sample33,sample1,sample55,sample2,sample65,sample51,sample47,sample31,sample48,sample7,sample62,sample49,sample17,sample76,sample58,sample26,sample64,sample44,sample29,sample35,sample18,sample40,sample50,sample9,sample77,sample66,sample61,sample6,sample36
chr6	134699995	134701816	2.77136	1.07536	2.57714	6.59024e-14	5.17724e-12	30	sample10,sample33,sample1,sample2,sample65,sample51,sample47,sample69,sample54,sample46,sample31,sample62,sample49,sample17,sample30,sample58,sample28,sample59,sample64,sample44,sample35,sample40,sample50,sample9,sample73,sample53,sample77,sample6,sample37,sample36
chr9	42853128	42855323	2.38648	0.889729	2.68226	6.62594e-14	5.19469e-12	15	sample1,sample65,sample47,sample69,sample54,sample46,sample31,sample48,sample58,sample56,sample35,sample18,sample50,sample77,sample6
chr15	56244041	56246179	2.06301	0.375961	5.4873	6.80318e-14	5.30125e-12	20	sample5,sample1,sample65,sample51,sample69,sample31,sample48,sample75,sample62,sample49,sample17,sample58,sample64,sample40,sample50,sample63,sample53,sample61,sample6,sample36
chr3	149082744	149089906	3.48473	1.19785	2.90916	7.06765e-14	5.4962e-12	43	sample10,sample5,sample33,sample1,sample4,sample65,sample51,sample47,sample69,sample54,sample46,sample31,sample48,sample75,sample62,sample49,sample17,sample34,sample30,sample76,sample58,sample28,sample57,sample70,sample59,sample56,sample64,sample44,sample29,sample35,sample18,sample40,sample50,sample9,sample63,sample73,sample53,sample77,sample66,sample61,sample6,sample37,sample36
chr7	150735640	150737238	2.94802	1.09772	2.68557	7.14835e-14	5.54775e-12	23	sample10,sample5,sample33,sample1,sample2,sample47,sample32,sample48,sample75,sample7,sample58,sample74,sample56,sample72,sample29,sample18,sample40,sample50,sample53,sample77,sample60,sample61,sample36
chr21	45197793	45203386	3.19283	1.18225	2.70063	7.25162e-14	5.61658e-12	33	sample10,sample5,sample42,sample1,sample2,sample65,sample51,sample69,sample54,sample46,sample3,sample75,sample39,sample62,sample49,sample17,sample68,sample76,sample74,sample70,sample59,sample56,sample64,sample35,sample63,sample73,sample77,sample38,sample66,sample61,sample6,sample37,sample36
chr7	155713763	155715393	3.44205	0.982117	3.50473	7.41662e-14	5.73284e-12	37	sample10,sample5,sample33,sample1,sample55,sample2,sample65,sample51,sample47,sample69,sample54,sample46,sample31,sample3,sample48,sample62,sample49,sample17,sample34,sample30,sample76,sample58,sample74,sample70,sample72,sample64,sample44,sample35,sample18,sample40,sample9,sample63,sample77,sample66,sample61,sample6,sample36
chr13	113374502	113378066	3.41427	0.659687	5.17559	7.48106e-14	5.77106e-12	34	sample10,sample5,sample1,sample55,sample65,sample51,sample47,sample69,sample54,sample32,sample31,sample48,sample75,sample62,sample17,sample58,sample74,sample56,sample72,sample64,sample44,sample35,sample18,sample40,sample50,sample9,sample63,sample73,sample53,sample77,sample66,sample61,sample6,sample36
chr11	20132723	20134850	3.22796	1.37754	2.34328	7.57122e-14	5.82893e-12	35	sample80,sample10,sample5,sample42,sample33,sample1,sample2,sample51,sample47,sample69,sample31,sample48,sample75,sample39,sample49,sample34,sample30,sample76,sample58,sample26,sample74,sample56,sample72,sample16,sample64,sample44,sample29,sample35,sample18,sample50,sample53,sample77,sample60,sample6,sample36
chr6	52976402	52978969	2.64672	0.937329	2.82368	8.00422e-14	6.10128e-12	32	sample33,sample1,sample65,sample51,sample47,sample69,sample54,sample31,sample75,sample62,sample49,sample17,sample30,sample76,sample58,sample74,sample70,sample72,sample64,sample29,sample35,sample18,sample40,sample9,sample63,sample73,sample53,sample77,sample66,sample61,sample6,sample36
chr11	74215271	74216913	2.91299	0.463071	6.2906	8.05251e-14	6.11387e-12	33	sample10,sample33,sample1,sample2,sample51,sample47,sample69,sample54,sample32,sample31,sample75,sample62,sample17,sample34,sample30,sample76,sample58,sample28,sample70,sample59,sample56,sample64,sample44,sample40,sample9,sample63,sample53,sample77,sample66,sample61,sample6,sample37,sample36
chr3	30637142	30641138	1.97559	0.862603	2.29026	8.05509e-14	6.10379e-12	24	sample33,sample1,sample65,sample47,sample69,sample54,sample31,sample48,sample75,sample62,sample49,sample17,sample30,sample76,sample70,sample59,sample64,sample35,sample40,sample50,sample9,sample63,sample6,sample36
chr8	134141888	134143600	2.34825	0.882169	2.66191	8.15106e-14	6.16438e-12	15	sample10,sample1,sample2,sample69,sample48,sample75,sample39,sample7,sample17,sample34,sample50,sample77,sample60,sample61,sample36
chr10	30711170	30713860	3.53563	1.60832	2.19834	8.16571e-14	6.16335e-12	33	sample10,sample33,sample1,sample55,sample2,sample65,sample51,sample47,sample32,sample31,sample48,sample75,sample62,sample49,sample30,sample76,sample28,sample26,sample59,sample56,sample72,sample64,sample35,sample18,sample40,sample50,sample9,sample73,sample77,sample66,sample6,sample37,sample36
chr7	100780333	100782609	2.65505	1.06259	2.49865	8.26154e-14	6.21132e-12	31	sample10,sample33,sample1,sample4,sample2,sample65,sample51,sample47,sample69,sample31,sample48,sample75,sample7,sample62,sample17,sample30,sample58,sample56,sample72,sample64,sample44,sample29,sample18,sample40,sample50,sample9,sample63,sample53,sample77,sample6,sample36
chr2	135163241	135172376	2.43058	1.02402	2.37357	8.3031e-14	6.21828e-12	38	sample10,sample5,sample1,sample55,sample4,sample65,sample51,sample47,sample54,sample32,sample31,sample48,sample75,sample62,sample49,sample17,sample34,sample30,sample76,sample58,sample70,sample59,sample56,sample72,sample64,sample44,sample35,sample18,sample40,sample50,sample9,sample63,sample53,sample77,sample66,sample6,sample37,sample36
chr7	47823123	47827533	2.53531	0.919463	2.75738	8.37075e-14	6.25677e-12	27	sample10,sample5,sample33,sample1,sample2,sample47,sample46,sample31,sample48,sample75,sample39,sample7,sample62,sample49,sample17,sample76,sample58,sample56,sample64,sample44,sample35,sample18,sample50,sample63,sample77,sample60,sample36
chr6	106164049	106164769	2.64979	0.818615	3.23692	8.47565e-14	6.28636e-12	16	sample10,sample1,sample51,sample47,sample31,sample75,sample49,sample64,sample44,sample35,sample40,sample9,sample63,sample77,sample66,sample36
chr14	23292956	23294530	2.82867	0.975497	2.89972	8.74692e-14	6.46265e-12	17	sample5,sample65,sample69,sample75,sample7,sample62,sample49,sample17,sample30,sample76,sample74,sample56,sample72,sample16,sample64,sample53,sample66
chr18	3648918	3656959	2.50981	0.946826	2.65076	8.93228e-14	6.58696e-12	38	sample43,sample5,sample33,sample1,sample51,sample47,sample69,sample46,sample31,sample48,sample75,sample62,sample49,sample17,sample68,sample34,sample79,sample30,sample76,sample58,sample28,sample26,sample74,sample59,sample72,sample64,sample44,sample29,sample35,sample18,sample40,sample50,sample9,sample63,sample77,sample66,sample37,sample36
chr10	124058533	124058896	4.29938	1.63361	2.63182	9.04388e-14	6.61854e-12	15	sample10,sample33,sample4,sample51,sample47,sample31,sample75,sample58,sample56,sample64,sample50,sample9,sample63,sample77,sample66
chr2	26980065	26981833	2.6689	0.576248	4.63152	9.06969e-14	6.62483e-12	26	sample43,sample10,sample5,sample33,sample1,sample2,sample65,sample47,sample46,sample48,sample75,sample49,sample17,sample76,sample58,sample56,sample64,sample44,sample35,sample40,sample50,sample9,sample77,sample66,sample61,sample36
chr2	101679753	101682720	2.26868	0.57437	3.94985	9.22276e-14	6.72388e-12	29	sample10,sample5,sample33,sample1,sample2,sample65,sample51,sample47,sample32,sample46,sample31,sample48,sample49,sample17,sample30,sample58,sample28,sample64,sample44,sample29,sample35,sample18,sample50,sample9,sample73,sample77,sample61,sample6,sample36
chr6	6889960	6893322	4.27004	1.79732	2.37578	9.33018e-14	6.77653e-12	35	sample10,sample5,sample33,sample1,sample4,sample51,sample47,sample69,sample54,sample31,sample3,sample75,sample62,sample17,sample34,sample30,sample58,sample28,sample74,sample70,sample59,sample56,sample72,sample64,sample35,sample40,sample50,sample9,sample73,sample53,sample77,sample66,sample6,sample37,sample36
chr10	17692586	17693301	2.61877	0.721396	3.63014	9.49632e-14	6.87126e-12	18	sample5,sample33,sample1,sample65,sample31,sample48,sample75,sample62,sample49,sample76,sample74,sample56,sample64,sample50,sample53,sample66,sample6,sample37
chr9	75090376	75093876	3.18838	1.58727	2.00872	9.53186e-14	6.88404e-12	37	sample10,sample5,sample67,sample33,sample1,sample4,sample51,sample47,sample69,sample54,sample32,sample31,sample3,sample75,sample7,sample62,sample17,sample68,sample30,sample58,sample28,sample70,sample59,sample56,sample72,sample64,sample35,sample18,sample50,sample9,sample73,sample53,sample77,sample66,sample6,sample37,sample36
chr6	160674854	160676481	2.30472	0.625946	3.68197	9.58435e-14	6.89608e-12	22	sample5,sample33,sample1,sample65,sample51,sample47,sample69,sample31,sample62,sample49,sample17,sample30,sample64,sample35,sample40,sample50,sample63,sample77,sample66,sample61,sample6,sample36
chr7	155743245	155747714	3.47196	0.830222	4.18196	1.00788e-13	7.22483e-12	48	sample43,sample10,sample5,sample42,sample33,sample1,sample55,sample2,sample65,sample51,sample47,sample69,sample54,sample46,sample31,sample3,sample48,sample75,sample62,sample49,sample17,sample68,sample34,sample30,sample76,sample58,sample28,sample74,sample70,sample59,sample56,sample72,sample64,sample44,sample29,sample35,sample18,sample40,sample50,sample9,sample63,sample73,sample53,sample77,sample66…
chr20	9280892	9284294	3.51103	0.949402	3.69815	1.03244e-13	7.37339e-12	44	sample43,sample10,sample5,sample42,sample65,sample51,sample47,sample69,sample54,sample32,sample46,sample31,sample3,sample48,sample75,sample62,sample49,sample17,sample34,sample30,sample76,sample58,sample28,sample74,sample70,sample59,sample56,sample72,sample64,sample44,sample29,sample35,sample40,sample50,sample9,sample63,sample73,sample53,sample77,sample66,sample60,sample61,sample37,sample36
chr4	124364621	124365749	2.36672	1.37358	1.72303	1.03374e-13	7.36902e-12	14	sample45,sample1,sample51,sample47,sample31,sample48,sample75,sample49,sample17,sample29,sample63,sample77,sample6,sample36
chr12	13711694	13714313	2.36028	0.439851	5.36609	1.04484e-13	7.42069e-12	29	sample10,sample33,sample1,sample55,sample2,sample51,sample47,sample69,sample54,sample46,sample31,sample48,sample62,sample49,sample17,sample76,sample58,sample28,sample70,sample56,sample72,sample64,sample44,sample35,sample9,sample73,sample77,sample66,sample36
chr21	42541821	42544675	2.56146	1.04578	2.44932	1.05278e-13	7.4496e-12	26	sample10,sample33,sample1,sample69,sample54,sample46,sample31,sample3,sample75,sample49,sample17,sample34,sample28,sample26,sample70,sample56,sample72,sample64,sample44,sample29,sample18,sample73,sample53,sample77,sample66,sample60
chr2	150025659	150027730	2.34646	0.663278	3.53767	1.07133e-13	7.56691e-12	28	sample10,sample33,sample1,sample65,sample51,sample47,sample69,sample54,sample46,sample31,sample48,sample62,sample49,sample17,sample30,sample76,sample64,sample44,sample29,sample35,sample9,sample63,sample73,sample77,sample66,sample61,sample6,sample37
chr2	225541479	225545805	2.9584	1.15525	2.56083	1.07211e-13	7.55856e-12	38	sample10,sample33,sample1,sample55,sample2,sample65,sample47,sample69,sample32,sample31,sample48,sample75,sample62,sample49,sample17,sample68,sample30,sample76,sample58,sample70,sample59,sample56,sample72,sample64,sample44,sample35,sample40,sample50,sample9,sample63,sample73,sample53,sample77,sample66,sample61,sample6,sample37,sample36
chr8	53378157	53381435	2.28498	0.44706	5.11113	1.08588e-13	7.64163e-12	43	sample43,sample10,sample33,sample1,sample55,sample4,sample2,sample65,sample51,sample47,sample69,sample54,sample46,sample31,sample3,sample48,sample75,sample7,sample62,sample49,sample17,sample30,sample76,sample58,sample28,sample74,sample59,sample72,sample64,sample44,sample35,sample40,sample50,sample9,sample63,sample73,sample53,sample77,sample66,sample61,sample6,sample37,sample36
chr7	156458001	156462640	2.81616	0.649203	4.33787	1.08621e-13	7.63005e-12	38	sample10,sample5,sample1,sample55,sample4,sample65,sample51,sample47,sample69,sample54,sample46,sample31,sample3,sample48,sample75,sample62,sample49,sample17,sample34,sample30,sample76,sample58,sample74,sample70,sample59,sample72,sample64,sample44,sample35,sample40,sample50,sample9,sample63,sample73,sample66,sample61,sample6,sample36
chr12	102046798	102048654	2.35673	0.80245	2.93691	1.10079e-13	7.70435e-12	28	sample43,sample5,sample1,sample4,sample65,sample51,sample47,sample69,sample46,sample31,sample62,sample17,sample58,sample74,sample70,sample59,sample56,sample64,sample44,sample35,sample40,sample50,sample9,sample63,sample66,sample61,sample6,sample36
chr5	158605660	158608550	2.12048	1.03527	2.04824	1.1224e-13	7.84131e-12	31	sample80,sample10,sample45,sample2,sample51,sample47,sample69,sample54,sample46,sample31,sample48,sample75,sample39,sample68,sample34,sample30,sample58,sample28,sample70,sample59,sample16,sample64,sample44,sample18,sample50,sample9,sample73,sample77,sample60,sample61,sample37
chr2	174089590	174105632	3.41354	1.02848	3.31901	1.12355e-13	7.83511e-12	43	sample43,sample10,sample5,sample1,sample55,sample65,sample51,sample47,sample69,sample54,sample32,sample46,sample31,sample3,sample48,sample75,sample62,sample49,sample17,sample68,sample30,sample76,sample58,sample74,sample70,sample59,sample56,sample72,sample64,sample44,sample35,sample40,sample50,sample9,sample63,sample73,sample53,sample77,sample66,sample61,sample6,sample37,sample36
chr12	92966714	92970063	2.13521	0.725484	2.94315	1.12808e-13	7.85247e-12	30	sample5,sample1,sample65,sample51,sample47,sample69,sample31,sample75,sample62,sample49,sample17,sample30,sample56,sample72,sample64,sample44,sample35,sample18,sample40,sample50,sample9,sample63,sample73,sample53,sample77,sample66,sample61,sample6,sample37,sample36
chr1	185226119	185227050	2.80473	0.548406	5.11433	1.13445e-13	7.88256e-12	24	sample42,sample1,sample65,sample51,sample47,sample69,sample48,sample75,sample62,sample49,sample17,sample68,sample76,sample58,sample56,sample72,sample64,sample35,sample18,sample40,sample9,sample63,sample73,sample77
chr3	99758621	99768562	2.96627	1.70902	1.73566	1.13696e-13	7.88579e-12	39	sample80,sample5,sample67,sample1,sample55,sample65,sample23,sample51,sample47,sample69,sample46,sample31,sample48,sample75,sample39,sample62,sample49,sample17,sample34,sample79,sample30,sample76,sample58,sample28,sample59,sample56,sample16,sample64,sample44,sample35,sample40,sample50,sample63,sample73,sample53,sample77,sample66,sample37,sample36
chr21	36398358	36401149	3.03885	1.80487	1.68369	1.13889e-13	7.87079e-12	30	sample43,sample5,sample45,sample1,sample55,sample2,sample65,sample51,sample47,sample54,sample75,sample39,sample7,sample62,sample17,sample68,sample34,sample26,sample74,sample72,sample16,sample64,sample44,sample18,sample50,sample9,sample73,sample53,sample77,sample36
chr6	147305586	147306363	2.61112	0.694672	3.75878	1.13903e-13	7.8577e-12	17	sample1,sample65,sample69,sample54,sample31,sample48,sample49,sample17,sample72,sample64,sample35,sample40,sample50,sample63,sample73,sample6,sample36
chr12	50260393	50264648	2.4281	1.01404	2.39449	1.14902e-13	7.91238e-12	31	sample5,sample1,sample55,sample2,sample65,sample51,sample47,sample69,sample32,sample46,sample31,sample75,sample62,sample49,sample17,sample30,sample76,sample58,sample74,sample72,sample64,sample35,sample40,sample9,sample63,sample53,sample77,sample66,sample61,sample6,sample36
chr5	173208630	173210646	2.42264	1.21736	1.99007	1.15275e-13	7.92391e-12	23	sample80,sample10,sample5,sample42,sample45,sample1,sample47,sample48,sample75,sample39,sample17,sample34,sample76,sample72,sample16,sample64,sample44,sample29,sample35,sample18,sample50,sample77,sample36
chr11	63375514	63379601	3.06941	1.05764	2.90213	1.16133e-13	7.96864e-12	36	sample10,sample5,sample33,sample1,sample55,sample2,sample51,sample47,sample69,sample32,sample46,sample31,sample48,sample75,sample7,sample62,sample49,sample17,sample34,sample30,sample76,sample58,sample56,sample72,sample64,sample44,sample18,sample40,sample50,sample9,sample63,sample73,sample53,sample77,sample6,sample37
chr8	36999907	37003151	2.64314	1.35672	1.94819	1.17506e-13	8.04856e-12	27	sample33,sample1,sample2,sample47,sample69,sample46,sample31,sample48,sample75,sample39,sample7,sample49,sample76,sample56,sample64,sample44,sample29,sample35,sample18,sample40,sample50,sample9,sample63,sample53,sample77,sample60,sample36
chr16	73048733	73051672	3.72668	1.61702	2.30466	1.20278e-13	8.18016e-12	35	sample5,sample33,sample1,sample55,sample65,sample51,sample47,sample69,sample54,sample32,sample31,sample48,sample75,sample62,sample17,sample68,sample30,sample76,sample28,sample74,sample59,sample56,sample72,sample64,sample44,sample35,sample9,sample63,sample73,sample53,sample77,sample66,sample6,sample37,sample36
chr15	101707416	101710918	3.07979	1.34934	2.28244	1.21313e-13	8.236e-12	32	sample80,sample10,sample5,sample45,sample33,sample1,sample55,sample2,sample51,sample47,sample32,sample31,sample48,sample75,sample39,sample7,sample17,sample34,sample30,sample58,sample74,sample56,sample72,sample64,sample29,sample18,sample9,sample53,sample77,sample66,sample60,sample36
chr3	39951149	39954497	2.5807	0.813688	3.1716	1.22172e-13	8.27971e-12	37	sample5,sample1,sample55,sample4,sample65,sample51,sample47,sample69,sample32,sample31,sample48,sample75,sample62,sample49,sample17,sample79,sample30,sample76,sample74,sample70,sample59,sample56,sample72,sample64,sample44,sample35,sample40,sample50,sample9,sample63,sample73,sample53,sample77,sample66,sample6,sample37,sample36
chr19	49228047	49229182	3.03971	1.37031	2.21825	1.23548e-13	8.34358e-12	26	sample10,sample42,sample1,sample47,sample69,sample32,sample31,sample48,sample75,sample62,sample49,sample17,sample34,sample76,sample58,sample56,sample64,sample44,sample35,sample40,sample63,sample77,sample66,sample6,sample37,sample36
chr5	73546068	73548292	2.9231	1.6199	1.8045	1.2689e-13	8.52446e-12	24	sample33,sample1,sample2,sample47,sample69,sample54,sample46,sample31,sample75,sample39,sample7,sample17,sample34,sample30,sample76,sample58,sample59,sample64,sample44,sample35,sample40,sample9,sample77,sample36
chr3	126639648	126641574	2.06118	0.783388	2.63111	1.28103e-13	8.57598e-12	18	sample10,sample1,sample65,sample51,sample47,sample69,sample32,sample31,sample48,sample75,sample58,sample56,sample35,sample9,sample63,sample77,sample6,sample36
chr1	117030727	117034182	4.18952	1.51044	2.7737	1.28416e-13	8.58202e-12	45	sample10,sample5,sample33,sample1,sample55,sample4,sample2,sample65,sample51,sample47,sample69,sample54,sample32,sample31,sample48,sample75,sample62,sample49,sample17,sample34,sample30,sample76,sample58,sample28,sample74,sample70,sample59,sample56,sample72,sample64,sample44,sample29,sample35,sample18,sample40,sample50,sample9,sample63,sample73,sample77,sample66,sample61,sample6,sample37,sample36
chr2	16145948	16147463	2.52927	0.774208	3.26692	1.29033e-13	8.60834e-12	33	sample10,sample5,sample42,sample1,sample65,sample51,sample69,sample46,sample31,sample48,sample75,sample62,sample49,sample17,sample30,sample76,sample58,sample56,sample72,sample64,sample44,sample29,sample35,sample18,sample40,sample50,sample9,sample73,sample77,sample66,sample61,sample6,sample36
chr6	6843092	6844084	2.08865	0.642595	3.25033	1.31662e-13	8.73827e-12	15	sample10,sample2,sample51,sample47,sample48,sample49,sample76,sample44,sample35,sample18,sample40,sample9,sample63,sample77,sample36
chr7	76356915	76358458	3.8713	1.37866	2.80801	1.39894e-13	9.23687e-12	35	sample10,sample1,sample4,sample2,sample51,sample47,sample69,sample54,sample32,sample31,sample75,sample62,sample49,sample17,sample76,sample58,sample26,sample74,sample70,sample59,sample56,sample72,sample64,sample44,sample35,sample40,sample9,sample63,sample73,sample53,sample77,sample66,sample6,sample37,sample36
chr12	27996356	27998046	1.90825	0.521846	3.65673	1.42723e-13	9.3914e-12	15	sample1,sample2,sample65,sample54,sample48,sample75,sample39,sample49,sample17,sample58,sample70,sample29,sample9,sample77,sample36
chr17	15546055	15556519	4.19468	2.173	1.93037	1.44704e-13	9.50555e-12	44	sample10,sample5,sample33,sample1,sample55,sample2,sample65,sample51,sample47,sample69,sample54,sample32,sample46,sample31,sample48,sample75,sample39,sample62,sample17,sample68,sample34,sample30,sample76,sample58,sample28,sample26,sample74,sample70,sample59,sample72,sample16,sample64,sample29,sample18,sample50,sample9,sample63,sample53,sample77,sample38,sample66,sample60,sample6,sample37
chr21	44913619	44915912	2.78932	1.23862	2.25196	1.44955e-13	9.50579e-12	34	sample10,sample5,sample1,sample55,sample4,sample2,sample51,sample47,sample69,sample46,sample48,sample75,sample39,sample7,sample49,sample17,sample34,sample76,sample58,sample26,sample74,sample56,sample72,sample64,sample29,sample18,sample50,sample9,sample63,sample53,sample77,sample60,sample6,sample36
chr5	73611421	73612725	2.30232	0.85074	2.70626	1.45945e-13	9.55441e-12	17	sample80,sample5,sample33,sample2,sample47,sample48,sample75,sample39,sample7,sample34,sample76,sample58,sample16,sample18,sample50,sample77,sample60
chr9	129746466	129750505	2.97216	1.38617	2.14415	1.47463e-13	9.63741e-12	38	sample10,sample27,sample5,sample45,sample33,sample1,sample55,sample2,sample51,sample47,sample69,sample54,sample32,sample31,sample3,sample48,sample75,sample62,sample49,sample17,sample34,sample58,sample28,sample59,sample64,sample44,sample35,sample18,sample40,sample9,sample63,sample73,sample53,sample77,sample66,sample6,sample37,sample36
chr3	30728506	30733282	3.99112	2.63546	1.51439	1.48455e-13	9.6694e-12	23	sample5,sample67,sample1,sample51,sample69,sample75,sample62,sample34,sample76,sample28,sample74,sample57,sample59,sample16,sample64,sample40,sample50,sample73,sample77,sample66,sample60,sample6,sample36
chr1	244253686	244257638	3.37757	0.940755	3.59028	1.49027e-13	9.69028e-12	43	sample10,sample5,sample1,sample55,sample65,sample51,sample47,sample69,sample54,sample32,sample46,sample31,sample3,sample48,sample75,sample62,sample49,sample17,sample34,sample30,sample76,sample58,sample28,sample70,sample59,sample56,sample72,sample64,sample44,sample29,sample35,sample18,sample40,sample50,sample9,sample73,sample53,sample77,sample66,sample61,sample6,sample37,sample36
chr8	102169322	102172680	6.74725	2.78832	2.41983	1.50533e-13	9.77172e-12	45	sample10,sample27,sample5,sample42,sample45,sample67,sample33,sample1,sample55,sample4,sample2,sample23,sample51,sample47,sample69,sample54,sample31,sample48,sample75,sample7,sample62,sample49,sample17,sample68,sample34,sample76,sample58,sample28,sample26,sample74,sample59,sample72,sample64,sample44,sample29,sample35,sample40,sample9,sample63,sample73,sample77,sample66,sample6,sample37,sample36
chr6	134354728	134360141	2.58741	0.721925	3.58404	1.51984e-13	9.83273e-12	39	sample10,sample5,sample33,sample1,sample55,sample65,sample51,sample47,sample69,sample54,sample32,sample31,sample3,sample48,sample75,sample62,sample49,sample17,sample30,sample58,sample74,sample59,sample72,sample64,sample44,sample29,sample35,sample40,sample50,sample9,sample63,sample73,sample53,sample77,sample66,sample61,sample6,sample37,sample36
chr16	69563025	69565172	3.55092	1.23667	2.87135	1.52459e-13	9.84688e-12	42	sample10,sample5,sample42,sample33,sample1,sample55,sample4,sample2,sample51,sample47,sample69,sample54,sample46,sample31,sample3,sample48,sample75,sample7,sample62,sample49,sample17,sample68,sample30,sample76,sample74,sample59,sample56,sample72,sample64,sample44,sample29,sample35,sample18,sample40,sample50,sample9,sample63,sample53,sample77,sample66,sample6,sample36
chr22	41047376	41049777	6.51409	3.72368	1.74937	1.55032e-13	9.9963e-12	29	sample80,sample42,sample55,sample2,sample51,sample69,sample31,sample75,sample62,sample49,sample68,sample34,sample76,sample58,sample28,sample26,sample74,sample59,sample72,sample64,sample44,sample35,sample18,sample73,sample53,sample77,sample6,sample37,sample36
chr3	172352725	172354309	1.92222	0.530536	3.62317	1.57333e-13	1.01277e-11	14	sample1,sample2,sample65,sample47,sample54,sample31,sample48,sample17,sample64,sample44,sample35,sample9,sample6,sample36
chr1	39648860	39652046	2.60503	1.45789	1.78685	1.57834e-13	1.01261e-11	22	sample45,sample33,sample1,sample47,sample69,sample31,sample75,sample62,sample17,sample30,sample76,sample58,sample56,sample64,sample44,sample18,sample53,sample77,sample60,sample61,sample6,sample36
chr3	185244754	185247348	2.23834	0.45292	4.94201	1.58028e-13	1.01217e-11	27	sample10,sample33,sample1,sample2,sample65,sample47,sample69,sample54,sample62,sample49,sample17,sample76,sample58,sample28,sample74,sample70,sample72,sample64,sample44,sample35,sample50,sample9,sample63,sample53,sample77,sample66,sample36
chr1	59964118	59968694	2.2716	0.756169	3.00409	1.5902e-13	1.01683e-11	30	sample10,sample1,sample65,sample47,sample69,sample54,sample32,sample46,sample31,sample48,sample62,sample49,sample17,sample30,sample76,sample58,sample59,sample64,sample44,sample35,sample40,sample50,sample9,sample63,sample73,sample77,sample66,sample61,sample6,sample36
chr7	73261239	73268011	4.95132	1.84741	2.68014	1.61045e-13	1.02637e-11	52	sample80,sample43,sample10,sample27,sample5,sample42,sample33,sample1,sample55,sample4,sample2,sample65,sample23,sample51,sample47,sample69,sample54,sample32,sample31,sample3,sample48,sample75,sample62,sample49,sample17,sample68,sample76,sample58,sample28,sample26,sample74,sample70,sample59,sample56,sample72,sample64,sample44,sample35,sample18,sample40,sample50,sample9,sample63,sample73,sample53,…
chr1	226233442	226235878	2.45146	0.55273	4.43519	1.62658e-13	1.03493e-11	29	sample33,sample1,sample65,sample51,sample47,sample69,sample31,sample48,sample62,sample49,sample17,sample76,sample58,sample74,sample70,sample56,sample72,sample64,sample35,sample18,sample40,sample50,sample9,sample63,sample73,sample53,sample77,sample66,sample36
chr7	73129333	73132354	3.48306	1.32851	2.62178	1.64647e-13	1.04242e-11	29	sample10,sample5,sample1,sample2,sample51,sample47,sample69,sample31,sample48,sample75,sample62,sample49,sample17,sample34,sample30,sample74,sample72,sample64,sample44,sample29,sample40,sample50,sample9,sample77,sample66,sample60,sample61,sample6,sample36
chr2	174082545	174084829	2.39613	0.722479	3.31654	1.65762e-13	1.04776e-11	29	sample5,sample1,sample65,sample47,sample69,sample32,sample31,sample48,sample62,sample49,sample17,sample30,sample58,sample74,sample70,sample59,sample64,sample44,sample35,sample40,sample50,sample9,sample73,sample53,sample66,sample61,sample6,sample37,sample36
chr6	108453808	108455266	1.85987	0.596999	3.11536	1.66819e-13	1.05271e-11	22	sample10,sample1,sample65,sample51,sample47,sample69,sample54,sample48,sample75,sample62,sample49,sample17,sample76,sample58,sample74,sample56,sample72,sample64,sample40,sample50,sample73,sample77
chr6	137344391	137350221	4.18819	1.79441	2.33403	1.67924e-13	1.05795e-11	42	sample5,sample45,sample67,sample33,sample1,sample55,sample2,sample51,sample47,sample69,sample54,sample31,sample3,sample48,sample75,sample62,sample49,sample17,sample68,sample79,sample30,sample76,sample28,sample74,sample70,sample59,sample56,sample72,sample64,sample44,sample29,sample35,sample40,sample9,sample73,sample53,sample77,sample38,sample66,sample6,sample37,sample36
chr19	7134018	7136450	2.62976	1.3828	1.90177	1.68693e-13	1.06105e-11	29	sample5,sample33,sample4,sample65,sample51,sample47,sample69,sample32,sample31,sample48,sample75,sample49,sample30,sample76,sample58,sample74,sample59,sample56,sample72,sample44,sample18,sample40,sample50,sample9,sample63,sample73,sample66,sample6,sample36
chr11	97444054	97446526	1.43059	0.118534	12.069	1.73719e-13	1.09088e-11	15	sample42,sample1,sample47,sample69,sample48,sample75,sample49,sample76,sample58,sample56,sample64,sample44,sample35,sample6,sample36
chr1	95178641	95180592	2.61973	1.588	1.6497	1.76042e-13	1.10188e-11	27	sample10,sample5,sample45,sample33,sample1,sample4,sample2,sample51,sample47,sample69,sample54,sample46,sample31,sample48,sample75,sample58,sample28,sample57,sample70,sample59,sample56,sample72,sample16,sample29,sample35,sample18,sample77
chr1	8130026	8131559	1.9961	0.586384	3.40408	1.76095e-13	1.10042e-11	21	sample10,sample33,sample1,sample2,sample65,sample47,sample31,sample48,sample62,sample49,sample30,sample64,sample44,sample35,sample40,sample9,sample63,sample77,sample66,sample6,sample36
chr1	207920673	207923413	3.94799	0.973849	4.054	1.76154e-13	1.09901e-11	40	sample10,sample42,sample33,sample1,sample55,sample2,sample51,sample47,sample54,sample32,sample46,sample3,sample48,sample75,sample62,sample17,sample68,sample79,sample30,sample76,sample58,sample28,sample70,sample59,sample56,sample72,sample64,sample44,sample29,sample40,sample50,sample9,sample63,sample73,sample53,sample77,sample66,sample61,sample6,sample37
chr5	153665130	153667931	2.36715	1.07257	2.20699	1.76168e-13	1.09732e-11	24	sample10,sample51,sample47,sample69,sample54,sample46,sample31,sample48,sample62,sample49,sample58,sample28,sample26,sample56,sample64,sample44,sample29,sample40,sample50,sample9,sample66,sample61,sample6,sample36
chr14	34549943	34551448	1.91237	0.454779	4.20505	1.76281e-13	1.09624e-11	15	sample10,sample33,sample1,sample2,sample51,sample47,sample69,sample54,sample48,sample49,sample17,sample58,sample18,sample9,sample77
chr6	106227952	106230640	2.04506	0.411241	4.97291	1.77699e-13	1.10328e-11	25	sample10,sample33,sample1,sample2,sample65,sample51,sample47,sample69,sample46,sample31,sample48,sample49,sample17,sample58,sample56,sample64,sample35,sample40,sample50,sample9,sample53,sample77,sample66,sample6,sample36
chr20	43154497	43155421	3.36616	1.14053	2.9514	1.78425e-13	1.10601e-11	21	sample55,sample65,sample47,sample69,sample32,sample31,sample48,sample75,sample17,sample76,sample28,sample56,sample72,sample64,sample40,sample50,sample9,sample63,sample77,sample6,sample36
chr11	20388184	20390001	1.92577	0.898037	2.14442	1.78911e-13	1.10723e-11	18	sample45,sample33,sample1,sample2,sample51,sample47,sample54,sample31,sample48,sample59,sample56,sample64,sample44,sample50,sample9,sample77,sample60,sample36
chr7	155856873	155859099	1.95121	0.26642	7.32382	1.81975e-13	1.12259e-11	17	sample1,sample55,sample2,sample65,sample69,sample48,sample75,sample62,sample49,sample17,sample76,sample64,sample44,sample40,sample63,sample6,sample36
chr2	196311380	196317085	1.23134	0.36782	3.34765	1.82371e-13	1.12323e-11	17	sample5,sample65,sample69,sample54,sample31,sample48,sample49,sample76,sample58,sample59,sample64,sample29,sample35,sample63,sample61,sample6,sample36
chr6	28914209	28916819	2.66269	0.980966	2.71435	1.82458e-13	1.12197e-11	32	sample10,sample45,sample33,sample65,sample51,sample47,sample69,sample54,sample46,sample31,sample3,sample48,sample17,sample76,sample58,sample28,sample70,sample59,sample56,sample72,sample64,sample29,sample35,sample18,sample40,sample50,sample9,sample53,sample77,sample66,sample6,sample36
chr12	76114791	76117319	1.96019	0.900251	2.17738	1.85153e-13	1.13673e-11	18	sample1,sample2,sample47,sample69,sample46,sample31,sample48,sample49,sample34,sample76,sample58,sample16,sample35,sample18,sample9,sample66,sample37,sample36
chr22	27508273	27509671	1.89154	0.618135	3.06008	1.86412e-13	1.14263e-11	18	sample10,sample5,sample1,sample2,sample47,sample75,sample39,sample7,sample49,sample17,sample76,sample74,sample29,sample18,sample50,sample77,sample60,sample36
chr16	2598937	2603126	3.95203	1.37141	2.88173	1.86778e-13	1.14306e-11	40	sample43,sample10,sample5,sample33,sample1,sample55,sample65,sample51,sample47,sample69,sample32,sample31,sample48,sample75,sample62,sample17,sample30,sample76,sample58,sample74,sample70,sample59,sample56,sample72,sample64,sample44,sample35,sample40,sample50,sample9,sample63,sample73,sample53,sample77,sample66,sample60,sample61,sample6,sample37,sample36
chr18	56450816	56460041	2.62552	1.18284	2.21967	1.87528e-13	1.14583e-11	44	sample10,sample5,sample33,sample1,sample55,sample2,sample51,sample47,sample69,sample46,sample31,sample48,sample75,sample39,sample7,sample62,sample49,sample17,sample30,sample76,sample58,sample26,sample74,sample70,sample59,sample72,sample16,sample64,sample44,sample29,sample35,sample18,sample40,sample50,sample9,sample63,sample73,sample53,sample77,sample60,sample61,sample6,sample37,sample36
chr2	101382790	101385328	2.58952	0.965872	2.68101	1.87706e-13	1.1451e-11	25	sample10,sample1,sample65,sample51,sample47,sample54,sample46,sample31,sample48,sample17,sample30,sample58,sample56,sample64,sample44,sample35,sample18,sample9,sample63,sample73,sample77,sample66,sample61,sample6,sample36
chr2	118899917	118900818	2.57902	0.656355	3.92931	1.90434e-13	1.1599e-11	17	sample33,sample1,sample4,sample47,sample32,sample48,sample17,sample58,sample74,sample59,sample72,sample64,sample18,sample40,sample9,sample63,sample77
chr2	153277053	153279301	2.60449	1.23645	2.10643	1.91853e-13	1.1667e-11	22	sample45,sample33,sample2,sample65,sample47,sample69,sample32,sample31,sample48,sample7,sample17,sample68,sample76,sample58,sample59,sample64,sample44,sample35,sample18,sample50,sample77,sample36
chr3	172370216	172372246	2.14859	0.403112	5.33002	1.92375e-13	1.16803e-11	18	sample1,sample65,sample69,sample31,sample3,sample48,sample62,sample49,sample17,sample58,sample64,sample40,sample9,sample63,sample73,sample61,sample37,sample36
chr7	34108087	34110726	1.92777	0.284486	6.77633	1.93991e-13	1.17413e-11	20	sample42,sample1,sample65,sample69,sample31,sample3,sample48,sample17,sample30,sample76,sample58,sample59,sample56,sample64,sample50,sample9,sample63,sample6,sample37,sample36
chr5	73622136	73624726	2.89956	1.06252	2.72894	1.94514e-13	1.17361e-11	27	sample33,sample1,sample2,sample51,sample47,sample69,sample31,sample48,sample62,sample49,sample30,sample76,sample58,sample26,sample59,sample64,sample44,sample35,sample18,sample40,sample50,sample9,sample63,sample77,sample66,sample6,sample36
chr8	94944103	94949268	2.4479	0.79202	3.09071	1.95926e-13	1.17844e-11	31	sample27,sample42,sample33,sample1,sample55,sample2,sample47,sample69,sample31,sample48,sample49,sample17,sample68,sample76,sample58,sample56,sample72,sample64,sample44,sample35,sample40,sample50,sample9,sample63,sample73,sample77,sample66,sample61,sample6,sample37,sample36
chr2	111205970	111207233	2.54845	1.13195	2.25138	1.96441e-13	1.17969e-11	14	sample33,sample47,sample69,sample31,sample48,sample49,sample30,sample76,sample59,sample64,sample29,sample50,sample9,sample6
chr8	126185570	126189134	2.83265	0.87876	3.22346	1.98827e-13	1.19216e-11	33	sample10,sample5,sample33,sample1,sample55,sample2,sample65,sample51,sample47,sample69,sample46,sample31,sample48,sample49,sample17,sample68,sample76,sample58,sample59,sample56,sample64,sample44,sample29,sample35,sample40,sample50,sample9,sample63,sample77,sample66,sample6,sample37,sample36
chr7	129648075	129650784	3.86653	1.06243	3.63933	2.00587e-13	1.20084e-11	33	sample10,sample33,sample1,sample55,sample2,sample65,sample51,sample47,sample69,sample54,sample46,sample31,sample48,sample75,sample62,sample49,sample17,sample34,sample30,sample76,sample58,sample74,sample72,sample64,sample44,sample29,sample9,sample73,sample53,sample77,sample66,sample6,sample36
chr2	8452101	8454570	3.46218	1.62453	2.13119	2.06885e-13	1.23279e-11	33	sample10,sample5,sample33,sample1,sample2,sample65,sample51,sample47,sample69,sample54,sample32,sample31,sample75,sample62,sample17,sample34,sample58,sample28,sample59,sample72,sample64,sample44,sample29,sample35,sample18,sample40,sample9,sample63,sample73,sample53,sample77,sample66,sample36
chr12	57972597	57974730	2.36658	0.420976	5.62165	2.1058e-13	1.25094e-11	22	sample43,sample33,sample1,sample65,sample51,sample69,sample32,sample48,sample17,sample58,sample64,sample29,sample35,sample18,sample40,sample50,sample9,sample63,sample61,sample6,sample37,sample36
chr8	26114907	26117527	2.015	0.929166	2.16862	2.17548e-13	1.28243e-11	22	sample67,sample2,sample47,sample69,sample54,sample46,sample31,sample48,sample49,sample30,sample58,sample28,sample59,sample56,sample64,sample44,sample50,sample9,sample73,sample53,sample77,sample36
chr7	27716748	27719863	5.33141	1.6341	3.2626	2.21179e-13	1.29986e-11	46	sample10,sample5,sample42,sample45,sample33,sample1,sample55,sample4,sample2,sample65,sample51,sample47,sample69,sample46,sample31,sample48,sample75,sample7,sample62,sample49,sample17,sample30,sample76,sample58,sample28,sample74,sample57,sample59,sample56,sample72,sample64,sample44,sample29,sample35,sample40,sample50,sample9,sample63,sample73,sample53,sample77,sample66,sample61,sample6,sample37,s…
chr11	102467185	102476056	2.08513	0.432429	4.82189	2.21834e-13	1.30172e-11	42	sample10,sample5,sample42,sample33,sample1,sample55,sample2,sample65,sample51,sample47,sample69,sample54,sample46,sample31,sample48,sample75,sample62,sample49,sample17,sample30,sample76,sample58,sample28,sample26,sample59,sample56,sample72,sample64,sample44,sample29,sample35,sample18,sample40,sample50,sample9,sample63,sample53,sample77,sample66,sample6,sample37,sample36
chr1	23336747	23338215	1.96636	0.373038	5.2712	2.22709e-13	1.30487e-11	16	sample10,sample33,sample1,sample2,sample65,sample51,sample47,sample56,sample72,sample35,sample18,sample9,sample63,sample77,sample66,sample6
chr3	14450495	14453409	2.27287	0.894003	2.54235	2.30845e-13	1.34843e-11	18	sample10,sample5,sample1,sample2,sample47,sample48,sample75,sample39,sample62,sample49,sample34,sample72,sample64,sample18,sample53,sample77,sample66,sample36
chr12	125116015	125122873	3.63995	1.75119	2.07855	2.31112e-13	1.3459e-11	42	sample10,sample5,sample42,sample33,sample1,sample55,sample4,sample2,sample51,sample47,sample54,sample32,sample31,sample48,sample75,sample49,sample17,sample34,sample76,sample58,sample28,sample26,sample74,sample70,sample59,sample72,sample64,sample44,sample29,sample35,sample18,sample40,sample9,sample63,sample73,sample53,sample77,sample66,sample61,sample6,sample37,sample36
chr12	85961689	85962713	2.11067	0.384274	5.49263	2.32001e-13	1.34904e-11	14	sample43,sample5,sample1,sample65,sample51,sample62,sample49,sample17,sample58,sample64,sample44,sample50,sample61,sample36
chr6	40866017	40868994	2.17063	0.425051	5.10675	2.32128e-13	1.34774e-11	27	sample10,sample5,sample1,sample47,sample69,sample31,sample48,sample62,sample49,sample17,sample30,sample76,sample58,sample74,sample72,sample64,sample44,sample35,sample40,sample50,sample9,sample63,sample73,sample53,sample66,sample61,sample36
chr15	85451610	85459489	2.69536	0.969241	2.7809	2.32385e-13	1.3472e-11	43	sample80,sample43,sample10,sample5,sample1,sample55,sample2,sample65,sample51,sample47,sample69,sample46,sample31,sample3,sample48,sample75,sample39,sample7,sample62,sample49,sample17,sample30,sample76,sample58,sample26,sample74,sample56,sample16,sample64,sample29,sample35,sample18,sample50,sample63,sample73,sample53,sample77,sample66,sample60,sample61,sample6,sample37,sample36
chr20	10520481	10522759	2.7399	0.560935	4.88452	2.33299e-13	1.35047e-11	32	sample43,sample10,sample5,sample42,sample33,sample2,sample65,sample51,sample47,sample69,sample32,sample31,sample48,sample75,sample7,sample49,sample17,sample68,sample76,sample58,sample56,sample64,sample44,sample35,sample18,sample50,sample63,sample53,sample77,sample6,sample37,sample36
chr16	89688746	89693225	1.7293	0.431362	4.00893	2.36934e-13	1.3674e-11	18	sample1,sample65,sample69,sample31,sample62,sample49,sample17,sample76,sample58,sample72,sample64,sample40,sample63,sample73,sample53,sample66,sample6,sample36
chr12	92060753	92062446	2.24323	0.72921	3.07625	2.39691e-13	1.37712e-11	22	sample1,sample2,sample65,sample51,sample47,sample69,sample54,sample46,sample31,sample48,sample62,sample49,sample17,sample56,sample64,sample35,sample40,sample50,sample77,sample6,sample37,sample36
chr6	3911574	3914939	3.14325	0.862113	3.64599	2.43147e-13	1.39281e-11	37	sample5,sample33,sample2,sample65,sample23,sample51,sample47,sample69,sample54,sample32,sample31,sample48,sample62,sample49,sample17,sample30,sample76,sample58,sample28,sample26,sample59,sample56,sample64,sample44,sample35,sample18,sample40,sample9,sample63,sample73,sample53,sample77,sample66,sample61,sample6,sample37,sample36
chr6	74276085	74278060	3.77739	1.91552	1.97199	2.43586e-13	1.39326e-11	29	sample10,sample5,sample42,sample33,sample1,sample51,sample47,sample69,sample32,sample31,sample48,sample75,sample62,sample17,sample68,sample30,sample76,sample28,sample59,sample64,sample35,sample40,sample9,sample73,sample53,sample77,sample66,sample37,sample36
chr8	66627566	66631596	2.98616	1.27987	2.33317	2.44208e-13	1.39474e-11	38	sample10,sample5,sample42,sample33,sample1,sample55,sample4,sample65,sample51,sample47,sample69,sample54,sample32,sample31,sample3,sample48,sample75,sample7,sample49,sample17,sample30,sample76,sample58,sample28,sample70,sample59,sample56,sample72,sample44,sample35,sample40,sample9,sample63,sample73,sample77,sample66,sample37,sample36
chr10	63594487	63600413	3.06538	1.56185	1.96267	2.4515e-13	1.39804e-11	39	sample43,sample33,sample1,sample2,sample65,sample51,sample47,sample32,sample46,sample48,sample75,sample62,sample49,sample17,sample68,sample30,sample76,sample58,sample74,sample59,sample56,sample16,sample64,sample44,sample29,sample35,sample40,sample50,sample9,sample63,sample73,sample53,sample77,sample66,sample60,sample61,sample6,sample37,sample36
chr7	30834677	30838762	3.40605	1.344	2.53425	2.45169e-13	1.39608e-11	36	sample80,sample10,sample5,sample1,sample55,sample65,sample51,sample47,sample69,sample32,sample46,sample31,sample48,sample75,sample62,sample49,sample17,sample30,sample58,sample74,sample56,sample64,sample44,sample35,sample18,sample40,sample50,sample63,sample73,sample53,sample77,sample66,sample61,sample6,sample37,sample36
chr14	21182259	21184636	2.748	1.17029	2.34814	2.45686e-13	1.39697e-11	28	sample43,sample10,sample45,sample1,sample2,sample47,sample46,sample31,sample48,sample75,sample62,sample49,sample34,sample30,sample76,sample72,sample64,sample44,sample35,sample40,sample9,sample63,sample73,sample53,sample77,sample66,sample6,sample36
chr8	126422015	126425988	4.25908	2.02897	2.09913	2.55179e-13	1.4488e-11	36	sample5,sample42,sample33,sample1,sample55,sample51,sample47,sample69,sample31,sample3,sample48,sample75,sample39,sample7,sample62,sample49,sample17,sample76,sample58,sample28,sample74,sample70,sample72,sample64,sample18,sample40,sample50,sample9,sample63,sample73,sample53,sample77,sample66,sample6,sample37,sample36
chr12	31884264	31887788	3.02788	1.59202	1.90191	2.56511e-13	1.45208e-11	34	sample10,sample5,sample45,sample33,sample2,sample51,sample47,sample69,sample54,sample46,sample48,sample75,sample39,sample7,sample62,sample49,sample17,sample68,sample34,sample76,sample28,sample26,sample70,sample59,sample56,sample44,sample35,sample18,sample40,sample9,sample63,sample77,sample37,sample36
chr6	126262754	126268947	4.07091	1.83114	2.22316	2.67155e-13	1.5013e-11	38	sample43,sample10,sample5,sample45,sample67,sample33,sample1,sample55,sample51,sample47,sample69,sample32,sample31,sample3,sample48,sample75,sample62,sample49,sample17,sample30,sample76,sample28,sample74,sample59,sample56,sample64,sample35,sample40,sample50,sample9,sample73,sample53,sample77,sample38,sample66,sample6,sample37,sample36
chr7	74049508	74051136	3.78593	1.43083	2.64596	2.69307e-13	1.50679e-11	35	sample10,sample5,sample33,sample1,sample2,sample65,sample51,sample47,sample69,sample54,sample31,sample3,sample48,sample75,sample62,sample49,sample17,sample76,sample58,sample74,sample70,sample72,sample64,sample44,sample18,sample40,sample50,sample9,sample73,sample53,sample77,sample66,sample61,sample6,sample36
chr2	37616658	37618505	2.39484	1.25164	1.91336	2.73278e-13	1.52457e-11	19	sample10,sample5,sample33,sample1,sample2,sample51,sample47,sample69,sample48,sample17,sample64,sample44,sample35,sample18,sample50,sample9,sample77,sample61,sample36
chr2	96310796	96314185	4.19009	1.48675	2.81828	2.769e-13	1.54255e-11	42	sample43,sample10,sample5,sample1,sample55,sample65,sample51,sample47,sample69,sample54,sample32,sample31,sample48,sample75,sample62,sample49,sample17,sample30,sample76,sample58,sample28,sample74,sample59,sample56,sample72,sample64,sample44,sample35,sample18,sample40,sample50,sample9,sample63,sample73,sample53,sample77,sample38,sample66,sample61,sample6,sample37,sample36
chr17	55516973	55521197	2.95388	1.56267	1.89028	2.80798e-13	1.5575e-11	30	sample10,sample5,sample33,sample1,sample55,sample2,sample65,sample51,sample47,sample32,sample46,sample75,sample39,sample49,sample17,sample34,sample76,sample58,sample26,sample72,sample64,sample44,sample29,sample18,sample50,sample9,sample63,sample53,sample77,sample6
chr17	80592222	80598057	3.35386	1.4165	2.36772	2.81831e-13	1.5565e-11	40	sample43,sample10,sample5,sample33,sample1,sample55,sample2,sample51,sample47,sample69,sample54,sample32,sample46,sample31,sample3,sample48,sample75,sample62,sample17,sample68,sample34,sample79,sample76,sample58,sample28,sample70,sample59,sample56,sample64,sample44,sample29,sample35,sample9,sample63,sample73,sample77,sample38,sample66,sample6,sample36
chr4	1999522	2001182	1.92794	0.415677	4.63808	2.81961e-13	1.55498e-11	18	sample10,sample33,sample1,sample51,sample47,sample69,sample54,sample31,sample49,sample17,sample30,sample58,sample29,sample9,sample63,sample73,sample6,sample36
chr3	194037987	194041900	2.85282	0.600986	4.74689	2.88351e-13	1.58795e-11	31	sample43,sample10,sample5,sample33,sample1,sample55,sample65,sample51,sample47,sample69,sample31,sample49,sample17,sample34,sample30,sample58,sample56,sample64,sample29,sample35,sample18,sample40,sample50,sample9,sample63,sample73,sample53,sample77,sample66,sample6,sample36
chr10	115208710	115212678	2.02299	0.4284	4.72219	2.89247e-13	1.59061e-11	22	sample43,sample10,sample65,sample51,sample47,sample31,sample48,sample75,sample49,sample30,sample76,sample58,sample64,sample35,sample40,sample9,sample63,sample73,sample77,sample66,sample37,sample36
chr4	792584	793851	2.43516	0.923197	2.63775	2.90497e-13	1.5952e-11	25	sample10,sample5,sample51,sample47,sample69,sample32,sample31,sample48,sample75,sample62,sample17,sample76,sample58,sample56,sample64,sample44,sample50,sample9,sample63,sample73,sample77,sample66,sample61,sample6,sample36
chr13	52337540	52339965	5.11913	1.70583	3.00095	2.91485e-13	1.59608e-11	41	sample10,sample27,sample5,sample42,sample67,sample33,sample1,sample55,sample2,sample65,sample47,sample69,sample32,sample31,sample3,sample75,sample62,sample17,sample34,sample30,sample76,sample58,sample26,sample74,sample56,sample72,sample64,sample44,sample35,sample18,sample40,sample50,sample9,sample63,sample73,sample53,sample77,sample66,sample6,sample37,sample36
chr6	106203711	106209711	2.73431	1.02355	2.67141	2.91553e-13	1.59418e-11	34	sample10,sample5,sample1,sample2,sample65,sample47,sample69,sample32,sample46,sample31,sample75,sample62,sample49,sample17,sample34,sample30,sample58,sample59,sample56,sample64,sample44,sample35,sample18,sample40,sample50,sample63,sample73,sample53,sample77,sample66,sample61,sample6,sample37,sample36
chr22	33115667	33118625	2.37812	0.629288	3.77906	2.93537e-13	1.60276e-11	36	sample43,sample5,sample1,sample55,sample65,sample51,sample47,sample69,sample31,sample3,sample48,sample75,sample62,sample49,sample17,sample68,sample30,sample76,sample74,sample70,sample56,sample72,sample64,sample44,sample35,sample40,sample50,sample9,sample63,sample73,sample53,sample38,sample66,sample61,sample6,sample36
chr4	38890273	38893735	2.49194	1.13824	2.18929	2.94074e-13	1.60341e-11	30	sample5,sample33,sample1,sample2,sample65,sample47,sample69,sample46,sample31,sample48,sample75,sample7,sample62,sample49,sample17,sample68,sample30,sample58,sample64,sample44,sample35,sample18,sample40,sample50,sample63,sample73,sample53,sample77,sample6,sample36
chr3	190062385	190064750	3.27942	1.37832	2.37929	2.94869e-13	1.60547e-11	33	sample42,sample45,sample33,sample1,sample4,sample2,sample65,sample51,sample47,sample69,sample54,sample32,sample31,sample48,sample75,sample62,sample49,sample17,sample30,sample76,sample59,sample56,sample64,sample29,sample35,sample40,sample50,sample9,sample73,sample77,sample66,sample37,sample36
chr20	50276943	50280128	1.82479	0.554633	3.29008	2.9513e-13	1.60462e-11	17	sample10,sample27,sample33,sample1,sample51,sample69,sample49,sample17,sample56,sample64,sample18,sample40,sample77,sample66,sample6,sample37,sample36
chr17	25860903	25868866	3.29011	1.56183	2.10658	3.01287e-13	1.63579e-11	45	sample10,sample5,sample1,sample55,sample4,sample65,sample51,sample47,sample69,sample54,sample32,sample31,sample48,sample75,sample7,sample62,sample17,sample68,sample30,sample76,sample58,sample28,sample26,sample74,sample70,sample59,sample56,sample16,sample64,sample44,sample35,sample18,sample40,sample50,sample9,sample63,sample73,sample53,sample77,sample38,sample60,sample61,sample6,sample37,sample36
chr17	81005799	81007624	4.04394	1.62144	2.49405	3.04196e-13	1.64462e-11	37	sample10,sample5,sample42,sample45,sample33,sample1,sample2,sample51,sample47,sample69,sample54,sample32,sample46,sample31,sample3,sample48,sample75,sample39,sample7,sample49,sample17,sample34,sample30,sample76,sample28,sample70,sample59,sample72,sample64,sample44,sample35,sample18,sample40,sample50,sample9,sample53,sample77
chr1	28677683	28679658	2.51203	0.812135	3.09311	3.109e-13	1.67382e-11	34	sample10,sample33,sample1,sample2,sample51,sample47,sample69,sample54,sample46,sample31,sample3,sample48,sample75,sample62,sample49,sample17,sample30,sample76,sample58,sample70,sample59,sample56,sample72,sample64,sample29,sample18,sample40,sample9,sample63,sample73,sample77,sample66,sample6,sample36
chr6	138913464	138915533	2.55916	1.24788	2.0508	3.13046e-13	1.68301e-11	20	sample10,sample33,sample1,sample65,sample51,sample47,sample69,sample54,sample31,sample48,sample68,sample56,sample64,sample18,sample50,sample9,sample77,sample61,sample6,sample36
chr17	41655678	41657371	2.48474	1.01937	2.43754	3.16158e-13	1.69738e-11	15	sample10,sample5,sample51,sample75,sample39,sample7,sample62,sample49,sample17,sample58,sample74,sample72,sample64,sample18,sample50
chr5	130152992	130154306	2.07599	0.220894	9.39814	3.24626e-13	1.73558e-11	17	sample10,sample51,sample47,sample69,sample54,sample31,sample58,sample74,sample70,sample59,sample72,sample9,sample63,sample73,sample77,sample6,sample36
chr22	28064450	28067821	3.70928	1.06935	3.46871	3.33046e-13	1.77566e-11	40	sample10,sample27,sample5,sample42,sample1,sample55,sample51,sample47,sample69,sample54,sample32,sample3,sample75,sample62,sample17,sample34,sample76,sample58,sample28,sample74,sample57,sample59,sample56,sample72,sample64,sample44,sample29,sample35,sample18,sample40,sample50,sample9,sample63,sample53,sample77,sample66,sample61,sample6,sample37,sample36
chr1	110158938	110160586	3.06923	1.55987	1.96761	3.37156e-13	1.79013e-11	23	sample10,sample33,sample1,sample2,sample51,sample47,sample48,sample75,sample39,sample49,sample17,sample34,sample76,sample58,sample72,sample64,sample18,sample50,sample63,sample77,sample60,sample61,sample36
chr8	133893414	133895375	2.3403	0.671477	3.4853	3.37467e-13	1.78932e-11	20	sample5,sample4,sample65,sample51,sample69,sample32,sample31,sample48,sample62,sample17,sample76,sample56,sample64,sample44,sample35,sample40,sample9,sample66,sample6,sample36
chr1	117050810	117052629	3.27254	1.44635	2.26262	3.3811e-13	1.79026e-11	27	sample10,sample5,sample45,sample33,sample1,sample2,sample51,sample47,sample69,sample31,sample48,sample75,sample49,sample17,sample34,sample56,sample72,sample64,sample44,sample35,sample18,sample40,sample9,sample63,sample77,sample6,sample36
chr3	107688086	107690276	2.75397	0.796106	3.4593	3.38736e-13	1.79111e-11	27	sample1,sample2,sample65,sample51,sample47,sample69,sample46,sample31,sample48,sample75,sample49,sample76,sample58,sample26,sample74,sample72,sample64,sample35,sample40,sample50,sample73,sample77,sample66,sample61,sample6,sample37,sample36
chr10	116003310	116007590	2.1689	0.688617	3.14964	3.46976e-13	1.83216e-11	24	sample10,sample1,sample51,sample47,sample46,sample31,sample48,sample62,sample49,sample17,sample68,sample76,sample28,sample56,sample72,sample64,sample35,sample40,sample9,sample63,sample73,sample77,sample66,sample36
chr12	52607594	52612717	2.10058	0.910557	2.30692	3.47246e-13	1.83108e-11	31	sample10,sample33,sample1,sample2,sample51,sample47,sample54,sample31,sample48,sample75,sample62,sample49,sample17,sample76,sample58,sample28,sample74,sample72,sample64,sample44,sample35,sample18,sample9,sample63,sample73,sample77,sample66,sample61,sample6,sample37,sample36
chr1	172901665	172903808	2.31602	1.01886	2.27315	3.4753e-13	1.83007e-11	23	sample10,sample33,sample1,sample2,sample51,sample47,sample69,sample46,sample31,sample48,sample75,sample49,sample76,sample58,sample56,sample29,sample35,sample18,sample50,sample9,sample53,sample77,sample6
chr2	65295037	65299041	3.29331	1.87598	1.75551	3.48624e-13	1.83332e-11	35	sample80,sample10,sample33,sample1,sample55,sample65,sample51,sample47,sample69,sample32,sample31,sample3,sample48,sample75,sample62,sample49,sample17,sample68,sample76,sample58,sample26,sample74,sample56,sample72,sample64,sample29,sample35,sample18,sample50,sample9,sample63,sample53,sample77,sample6,sample36
chr2	235877624	235879450	2.83082	1.0962	2.5824	3.51e-13	1.84079e-11	22	sample10,sample1,sample55,sample65,sample47,sample69,sample54,sample46,sample31,sample48,sample62,sample17,sample34,sample30,sample58,sample64,sample18,sample73,sample53,sample66,sample61,sample6
chr11	86522658	86523816	2.39448	0.772946	3.09786	3.51297e-13	1.83984e-11	15	sample5,sample33,sample1,sample2,sample47,sample69,sample46,sample31,sample75,sample17,sample30,sample76,sample58,sample74,sample73
chr14	54644383	54646799	2.26603	0.697955	3.24668	3.59496e-13	1.87513e-11	30	sample10,sample42,sample1,sample55,sample65,sample51,sample47,sample69,sample54,sample31,sample48,sample49,sample17,sample30,sample76,sample58,sample28,sample70,sample72,sample64,sample35,sample18,sample40,sample9,sample63,sample53,sample77,sample6,sample37,sample36
chr3	123323118	123325584	2.02902	0.538001	3.7714	3.62345e-13	1.88743e-11	18	sample10,sample33,sample1,sample2,sample51,sample47,sample69,sample48,sample62,sample49,sample64,sample35,sample18,sample9,sample63,sample77,sample61,sample36
chr17	25877431	25880907	2.45768	1.18676	2.07091	3.62798e-13	1.88724e-11	22	sample10,sample33,sample51,sample47,sample69,sample54,sample46,sample31,sample48,sample75,sample62,sample49,sample76,sample56,sample64,sample50,sample9,sample63,sample73,sample77,sample66,sample6
chr1	211820887	211823006	4.40292	1.79347	2.45497	3.64778e-13	1.89242e-11	38	sample5,sample42,sample33,sample1,sample55,sample65,sample51,sample47,sample69,sample32,sample31,sample3,sample48,sample75,sample7,sample62,sample49,sample17,sample68,sample76,sample74,sample59,sample56,sample72,sample64,sample35,sample18,sample40,sample50,sample9,sample63,sample73,sample53,sample77,sample66,sample6,sample37,sample36
chr8	29831840	29833755	2.17701	0.944895	2.30397	3.70892e-13	1.91639e-11	17	sample33,sample1,sample2,sample51,sample47,sample69,sample46,sample31,sample48,sample49,sample34,sample58,sample18,sample50,sample9,sample53,sample36
chr1	19332061	19342764	3.9701	1.73841	2.28375	3.7799e-13	1.95045e-11	49	sample80,sample10,sample27,sample5,sample33,sample1,sample55,sample4,sample2,sample65,sample23,sample51,sample47,sample54,sample46,sample31,sample3,sample48,sample75,sample62,sample49,sample17,sample68,sample30,sample76,sample58,sample28,sample26,sample74,sample70,sample59,sample56,sample72,sample64,sample44,sample35,sample18,sample50,sample9,sample73,sample53,sample77,sample38,sample66,sample60,…
chr15	70818436	70822804	2.37892	1.21181	1.96312	3.84241e-13	1.9774e-11	25	sample5,sample33,sample2,sample65,sample51,sample47,sample69,sample31,sample62,sample49,sample17,sample68,sample58,sample26,sample64,sample44,sample35,sample40,sample9,sample63,sample53,sample77,sample66,sample6,sample36
chr21	37573361	37576827	2.098	0.969453	2.16411	3.85667e-13	1.98209e-11	23	sample10,sample1,sample55,sample65,sample47,sample54,sample31,sample48,sample62,sample17,sample68,sample56,sample72,sample64,sample35,sample18,sample50,sample9,sample63,sample53,sample77,sample66,sample6
chr3	31326355	31332653	1.51946	0.28103	5.40677	3.89153e-13	1.99468e-11	18	sample5,sample1,sample65,sample69,sample31,sample48,sample62,sample49,sample17,sample76,sample35,sample40,sample9,sample63,sample53,sample66,sample6,sample36
chr1	87239126	87241592	1.98525	0.687986	2.88559	3.91845e-13	2.00581e-11	20	sample10,sample33,sample1,sample2,sample47,sample69,sample31,sample48,sample75,sample49,sample17,sample34,sample59,sample64,sample44,sample35,sample40,sample50,sample77,sample36
chr9	130149315	130155670	3.37811	1.2237	2.76058	3.9471e-13	2.01779e-11	43	sample10,sample27,sample5,sample1,sample55,sample4,sample65,sample51,sample47,sample69,sample54,sample32,sample31,sample3,sample48,sample75,sample62,sample49,sample17,sample68,sample30,sample76,sample58,sample28,sample74,sample59,sample56,sample72,sample64,sample44,sample35,sample40,sample50,sample9,sample63,sample73,sample53,sample77,sample66,sample61,sample6,sample37,sample36
chr15	51329431	51330845	2.30478	0.685373	3.36281	4.13545e-13	2.10569e-11	26	sample10,sample1,sample65,sample51,sample47,sample69,sample54,sample32,sample31,sample48,sample75,sample49,sample17,sample30,sample58,sample74,sample72,sample64,sample18,sample50,sample9,sample63,sample73,sample77,sample66,sample6
chr2	69989043	70010677	3.72246	2.08039	1.78931	4.13706e-13	2.10373e-11	49	sample43,sample10,sample8,sample5,sample45,sample67,sample33,sample1,sample55,sample4,sample65,sample51,sample47,sample69,sample54,sample32,sample31,sample48,sample75,sample7,sample62,sample49,sample17,sample34,sample30,sample76,sample58,sample28,sample74,sample70,sample59,sample56,sample64,sample44,sample29,sample35,sample18,sample40,sample50,sample9,sample63,sample73,sample53,sample77,sample38,…
chr8	119090393	119092472	2.23023	0.913517	2.44137	4.16019e-13	2.11269e-11	23	sample10,sample5,sample1,sample65,sample47,sample69,sample31,sample48,sample75,sample49,sample17,sample58,sample59,sample64,sample29,sample35,sample50,sample9,sample63,sample77,sample66,sample6,sample36
chr6	132299855	132304691	2.61437	1.13129	2.31097	4.1621e-13	2.11088e-11	39	sample10,sample5,sample45,sample33,sample1,sample4,sample65,sample51,sample47,sample69,sample54,sample32,sample31,sample75,sample62,sample49,sample17,sample30,sample76,sample58,sample26,sample74,sample59,sample56,sample72,sample64,sample44,sample35,sample40,sample50,sample9,sample63,sample73,sample53,sample77,sample66,sample61,sample6,sample37
chr1	211786156	211787445	2.7817	1.43807	1.93433	4.21347e-13	2.13132e-11	21	sample80,sample10,sample5,sample1,sample55,sample65,sample47,sample46,sample48,sample75,sample62,sample49,sample17,sample76,sample74,sample16,sample50,sample77,sample66,sample60,sample36
chr6	1315266	1317136	2.38124	0.504272	4.72214	4.32557e-13	2.18515e-11	22	sample5,sample33,sample2,sample65,sample51,sample47,sample31,sample49,sample76,sample58,sample59,sample72,sample64,sample44,sample18,sample40,sample50,sample9,sample63,sample73,sample77,sample66
chr20	36769549	36774432	7.98279	2.43626	3.27666	4.37201e-13	2.20283e-11	48	sample80,sample43,sample27,sample5,sample42,sample33,sample1,sample55,sample4,sample2,sample65,sample51,sample47,sample69,sample32,sample31,sample3,sample48,sample75,sample39,sample7,sample62,sample49,sample17,sample68,sample30,sample76,sample58,sample26,sample74,sample56,sample72,sample64,sample44,sample35,sample40,sample50,sample9,sample63,sample73,sample53,sample77,sample66,sample60,sample61,s…
chr1	84831033	84832498	2.73352	1.21484	2.2501	4.40909e-13	2.21861e-11	25	sample10,sample33,sample1,sample55,sample51,sample47,sample69,sample31,sample75,sample7,sample49,sample17,sample76,sample58,sample26,sample56,sample35,sample40,sample50,sample9,sample63,sample77,sample66,sample6,sample36
chr11	12196453	12197926	2.52142	1.269	1.98694	4.43235e-13	2.2274e-11	15	sample10,sample5,sample2,sample47,sample46,sample48,sample75,sample39,sample7,sample34,sample76,sample18,sample50,sample77,sample36
chr7	47816983	47819368	2.32614	0.348348	6.67765	4.51033e-13	2.26069e-11	22	sample5,sample1,sample55,sample65,sample69,sample31,sample48,sample62,sample17,sample76,sample70,sample59,sample56,sample64,sample44,sample35,sample50,sample63,sample77,sample6,sample37,sample36
chr9	12808995	12810451	2.49571	1.11207	2.2442	4.51506e-13	2.26011e-11	16	sample10,sample1,sample65,sample69,sample31,sample49,sample17,sample58,sample28,sample64,sample35,sample50,sample53,sample66,sample60,sample36
chr2	169071699	169074345	2.94824	1.17219	2.51516	4.52693e-13	2.26018e-11	35	sample10,sample1,sample2,sample65,sample51,sample47,sample69,sample54,sample46,sample31,sample75,sample62,sample49,sample17,sample30,sample76,sample58,sample28,sample70,sample59,sample56,sample64,sample29,sample35,sample18,sample50,sample9,sample63,sample73,sample53,sample77,sample66,sample61,sample6,sample36
chr17	3623049	3624491	2.9599	1.52811	1.93697	4.5385e-13	2.26302e-11	19	sample10,sample5,sample2,sample51,sample47,sample32,sample46,sample48,sample68,sample76,sample56,sample18,sample50,sample9,sample63,sample77,sample66,sample6,sample36
chr6	82647151	82648714	2.57469	0.977611	2.63365	4.57547e-13	2.2785e-11	24	sample10,sample5,sample33,sample1,sample2,sample47,sample46,sample31,sample48,sample49,sample34,sample59,sample56,sample64,sample44,sample29,sample35,sample50,sample9,sample77,sample61,sample6,sample37,sample36
chr6	135547779	135554348	2.72023	1.02569	2.65209	4.61538e-13	2.28949e-11	38	sample43,sample10,sample27,sample5,sample1,sample65,sample47,sample69,sample54,sample32,sample46,sample31,sample3,sample48,sample62,sample49,sample17,sample68,sample30,sample76,sample58,sample59,sample56,sample72,sample64,sample44,sample35,sample40,sample50,sample9,sample63,sample73,sample77,sample66,sample61,sample6,sample37,sample36
chr13	50759710	50760808	4.40018	1.26848	3.46886	4.6616e-13	2.30647e-11	42	sample10,sample5,sample42,sample33,sample1,sample55,sample2,sample65,sample51,sample47,sample69,sample54,sample32,sample31,sample48,sample75,sample62,sample49,sample17,sample68,sample30,sample76,sample58,sample74,sample70,sample59,sample56,sample72,sample64,sample44,sample35,sample18,sample40,sample50,sample9,sample63,sample73,sample53,sample77,sample66,sample6,sample36
chr1	215808109	215811001	5.0509	2.58285	1.95555	4.77054e-13	2.35734e-11	32	sample27,sample1,sample55,sample4,sample65,sample51,sample47,sample69,sample31,sample48,sample75,sample62,sample17,sample68,sample34,sample58,sample28,sample26,sample59,sample64,sample44,sample29,sample35,sample40,sample9,sample73,sample53,sample77,sample66,sample6,sample37,sample36
chr2	165566708	165568181	2.6449	0.997025	2.65279	4.77447e-13	2.35626e-11	29	sample10,sample5,sample33,sample1,sample51,sample47,sample69,sample31,sample62,sample49,sample17,sample30,sample76,sample58,sample74,sample59,sample72,sample64,sample35,sample18,sample50,sample9,sample63,sample73,sample53,sample77,sample66,sample6,sample36
chr21	36328354	36330760	1.87538	0.558343	3.35883	4.87928e-13	2.39265e-11	15	sample10,sample1,sample65,sample54,sample48,sample49,sample17,sample76,sample58,sample72,sample35,sample40,sample53,sample6,sample36
chr1	227001388	227004001	3.40686	1.48292	2.2974	4.98491e-13	2.43824e-11	36	sample80,sample1,sample65,sample51,sample47,sample69,sample32,sample31,sample48,sample75,sample62,sample49,sample17,sample34,sample30,sample76,sample58,sample56,sample72,sample16,sample64,sample44,sample29,sample35,sample18,sample40,sample50,sample63,sample73,sample53,sample77,sample60,sample61,sample6,sample37,sample36
chr5	174026274	174030031	1.79047	0.162301	11.0317	5.01733e-13	2.44787e-11	22	sample10,sample1,sample2,sample65,sample51,sample47,sample69,sample31,sample48,sample62,sample49,sample17,sample58,sample59,sample72,sample64,sample29,sample35,sample9,sample73,sample77,sample36
chr6	53598671	53600980	2.64653	1.00217	2.64078	5.16942e-13	2.51252e-11	40	sample5,sample42,sample33,sample1,sample2,sample65,sample51,sample47,sample69,sample54,sample32,sample31,sample48,sample75,sample49,sample17,sample68,sample30,sample76,sample58,sample28,sample70,sample59,sample56,sample72,sample64,sample44,sample29,sample35,sample18,sample40,sample50,sample9,sample53,sample77,sample66,sample61,sample6,sample37,sample36
chrX	46191539	46194013	2.78706	0.450403	6.18793	5.1829e-13	2.5159e-11	37	sample10,sample33,sample1,sample55,sample2,sample65,sample51,sample47,sample69,sample46,sample31,sample48,sample75,sample49,sample17,sample68,sample30,sample58,sample28,sample70,sample59,sample56,sample64,sample44,sample29,sample35,sample40,sample50,sample9,sample63,sample73,sample53,sample77,sample38,sample66,sample6,sample36
chr3	12510776	12514469	2.77251	0.971945	2.85254	5.19316e-13	2.5177e-11	37	sample43,sample10,sample5,sample42,sample33,sample1,sample55,sample65,sample51,sample47,sample69,sample46,sample3,sample75,sample49,sample17,sample30,sample76,sample58,sample28,sample70,sample59,sample56,sample72,sample64,sample40,sample50,sample9,sample63,sample73,sample53,sample77,sample66,sample61,sample6,sample37,sample36
chr2	161037084	161038475	5.36131	2.29011	2.34107	5.23584e-13	2.5352e-11	36	sample10,sample67,sample33,sample1,sample4,sample2,sample65,sample51,sample47,sample69,sample54,sample31,sample48,sample75,sample62,sample17,sample68,sample76,sample58,sample28,sample74,sample56,sample72,sample64,sample35,sample40,sample50,sample9,sample63,sample73,sample53,sample77,sample66,sample6,sample37,sample36
chr2	27957886	27961787	4.36968	2.27776	1.91841	5.42501e-13	2.60712e-11	28	sample80,sample10,sample5,sample1,sample2,sample65,sample51,sample47,sample69,sample48,sample75,sample62,sample17,sample34,sample58,sample28,sample26,sample74,sample56,sample72,sample64,sample50,sample53,sample77,sample66,sample60,sample61,sample36
chr20	45901815	45905119	2.78323	1.67134	1.66527	5.45787e-13	2.61312e-11	19	sample10,sample33,sample1,sample2,sample46,sample31,sample75,sample39,sample34,sample76,sample59,sample16,sample64,sample44,sample18,sample50,sample77,sample6,sample36
chr20	46060299	46062495	2.38954	0.636381	3.75489	5.61854e-13	2.68005e-11	18	sample1,sample51,sample47,sample31,sample48,sample75,sample62,sample76,sample58,sample64,sample44,sample35,sample40,sample9,sample77,sample66,sample6,sample36
chr5	173885511	173889093	1.81733	0.281752	6.45011	5.65354e-13	2.69341e-11	25	sample5,sample1,sample51,sample47,sample69,sample54,sample31,sample48,sample62,sample49,sample17,sample76,sample58,sample28,sample70,sample59,sample72,sample64,sample35,sample18,sample9,sample73,sample77,sample66,sample36
chr3	41142851	41144553	1.96403	0.644459	3.04756	5.80513e-13	2.7588e-11	18	sample33,sample1,sample65,sample51,sample47,sample31,sample62,sample17,sample58,sample56,sample64,sample44,sample40,sample50,sample9,sample66,sample6,sample36
chr18	3663266	3669994	2.5723	1.28133	2.00753	5.81351e-13	2.75938e-11	33	sample43,sample33,sample1,sample65,sample51,sample47,sample69,sample54,sample46,sample31,sample75,sample62,sample49,sample17,sample68,sample79,sample30,sample76,sample58,sample26,sample70,sample59,sample64,sample44,sample35,sample40,sample50,sample9,sample73,sample77,sample66,sample37,sample36
chr20	48199622	48202482	4.53483	1.43976	3.14972	5.83152e-13	2.76451e-11	43	sample43,sample27,sample5,sample42,sample1,sample55,sample23,sample51,sample47,sample69,sample32,sample31,sample3,sample48,sample75,sample62,sample49,sample17,sample30,sample76,sample58,sample26,sample74,sample57,sample56,sample72,sample16,sample64,sample44,sample35,sample18,sample40,sample50,sample9,sample63,sample73,sample53,sample77,sample66,sample61,sample6,sample37,sample36
chr20	52514176	52519122	3.63182	2.12923	1.7057	5.86194e-13	2.77552e-11	28	sample5,sample45,sample1,sample4,sample51,sample47,sample69,sample54,sample31,sample75,sample39,sample62,sample17,sample34,sample28,sample70,sample59,sample64,sample35,sample18,sample9,sample73,sample77,sample66,sample60,sample6,sample37,sample36
chr9	100143638	100146106	3.10857	1.19058	2.61097	5.88692e-13	2.7771e-11	36	sample43,sample5,sample42,sample33,sample1,sample55,sample65,sample51,sample47,sample69,sample32,sample31,sample48,sample62,sample49,sample17,sample68,sample30,sample76,sample58,sample74,sample59,sample56,sample64,sample44,sample29,sample35,sample40,sample50,sample9,sample73,sample53,sample77,sample6,sample37,sample36
chr6	126501630	126505921	1.53186	0.337785	4.53503	5.93587e-13	2.78993e-11	24	sample5,sample1,sample69,sample32,sample46,sample31,sample48,sample75,sample49,sample17,sample58,sample74,sample59,sample16,sample64,sample35,sample18,sample40,sample50,sample73,sample53,sample77,sample60,sample6
chr17	38671690	38679138	2.95327	1.42915	2.06645	5.99872e-13	2.81603e-11	33	sample27,sample5,sample33,sample1,sample55,sample2,sample51,sample47,sample69,sample54,sample48,sample75,sample7,sample62,sample68,sample76,sample58,sample28,sample26,sample70,sample59,sample72,sample64,sample29,sample18,sample40,sample9,sample63,sample53,sample77,sample66,sample6,sample36
chr6	128824146	128833728	3.4133	1.69667	2.01177	6.04148e-13	2.83265e-11	48	sample10,sample5,sample45,sample67,sample33,sample1,sample55,sample2,sample65,sample51,sample47,sample69,sample54,sample32,sample46,sample31,sample3,sample48,sample75,sample62,sample17,sample68,sample34,sample30,sample58,sample28,sample26,sample74,sample70,sample59,sample56,sample72,sample64,sample44,sample35,sample18,sample40,sample50,sample9,sample63,sample73,sample53,sample77,sample38,sample66…
chr20	5716303	5720840	4.11368	1.5984	2.57362	6.07612e-13	2.84543e-11	43	sample5,sample45,sample67,sample33,sample4,sample51,sample47,sample69,sample54,sample32,sample31,sample3,sample48,sample75,sample62,sample49,sample17,sample68,sample30,sample76,sample58,sample28,sample26,sample74,sample57,sample70,sample59,sample56,sample64,sample44,sample35,sample18,sample40,sample50,sample9,sample63,sample73,sample53,sample77,sample66,sample61,sample37,sample36
chr4	139267908	139270257	1.95451	0.454441	4.30092	6.12421e-13	2.86099e-11	15	sample33,sample1,sample47,sample54,sample31,sample48,sample49,sample30,sample58,sample59,sample56,sample44,sample35,sample9,sample36
chr6	110857886	110860114	2.06567	0.859176	2.40425	6.12454e-13	2.85767e-11	20	sample10,sample5,sample33,sample1,sample2,sample47,sample69,sample31,sample48,sample76,sample56,sample44,sample35,sample18,sample50,sample63,sample77,sample6,sample37,sample36
chr11	102434161	102435637	1.98064	0.553282	3.57981	6.16057e-13	2.86407e-11	15	sample33,sample1,sample51,sample47,sample48,sample75,sample76,sample72,sample64,sample29,sample35,sample9,sample63,sample77,sample36
chr9	119309488	119312435	2.89215	1.2422	2.32826	6.21258e-13	2.88477e-11	32	sample5,sample1,sample55,sample65,sample51,sample47,sample69,sample46,sample31,sample3,sample48,sample75,sample62,sample17,sample68,sample30,sample76,sample74,sample72,sample64,sample35,sample40,sample50,sample9,sample63,sample73,sample53,sample77,sample66,sample6,sample37,sample36
chr16	68691466	68693390	2.37504	0.668454	3.55304	6.25724e-13	2.902e-11	32	sample10,sample1,sample55,sample65,sample51,sample47,sample69,sample32,sample31,sample48,sample75,sample7,sample62,sample49,sample17,sample30,sample76,sample58,sample26,sample74,sample56,sample72,sample44,sample18,sample50,sample9,sample63,sample77,sample66,sample6,sample37,sample36
chr13	111558695	111562644	3.35414	1.30916	2.56206	6.26055e-13	2.90004e-11	40	sample10,sample5,sample42,sample33,sample1,sample55,sample65,sample51,sample47,sample69,sample54,sample32,sample31,sample75,sample62,sample17,sample30,sample58,sample28,sample70,sample59,sample56,sample72,sample64,sample44,sample29,sample35,sample18,sample40,sample50,sample9,sample63,sample73,sample53,sample77,sample66,sample61,sample6,sample37,sample36
chr1	37999642	38000997	2.08295	0.950306	2.19187	6.27934e-13	2.90176e-11	17	sample33,sample1,sample47,sample31,sample48,sample49,sample17,sample28,sample59,sample64,sample44,sample35,sample40,sample50,sample63,sample6,sample36
chr20	48584494	48587408	2.61263	0.876455	2.98091	6.28968e-13	2.90306e-11	21	sample1,sample55,sample65,sample51,sample47,sample48,sample75,sample49,sample58,sample74,sample56,sample64,sample44,sample35,sample40,sample63,sample53,sample77,sample66,sample6,sample36
chr7	73416547	73418466	3.61093	1.72027	2.09906	6.29291e-13	2.90107e-11	35	sample10,sample33,sample1,sample65,sample51,sample47,sample69,sample46,sample31,sample3,sample48,sample75,sample62,sample17,sample30,sample76,sample58,sample28,sample26,sample70,sample59,sample56,sample72,sample64,sample29,sample18,sample40,sample9,sample63,sample53,sample77,sample60,sample61,sample37,sample36
chr13	29147939	29150980	3.98073	0.921608	4.31933	6.3086e-13	2.90135e-11	36	sample10,sample5,sample33,sample1,sample2,sample65,sample51,sample47,sample69,sample32,sample31,sample75,sample62,sample49,sample17,sample30,sample58,sample59,sample56,sample72,sample64,sample44,sample29,sample35,sample18,sample40,sample50,sample9,sample63,sample73,sample53,sample77,sample66,sample61,sample6,sample36
chr3	9357849	9360186	2.49782	1.02563	2.4354	6.3325e-13	2.90887e-11	27	sample10,sample5,sample65,sample47,sample69,sample32,sample46,sample31,sample48,sample75,sample62,sample49,sample30,sample76,sample74,sample72,sample64,sample44,sample35,sample50,sample63,sample73,sample66,sample60,sample61,sample6,sample36
chr5	142059572	142061544	2.33013	0.85065	2.73924	6.35501e-13	2.91573e-11	24	sample33,sample1,sample2,sample51,sample47,sample69,sample54,sample46,sample48,sample49,sample17,sample58,sample56,sample64,sample44,sample29,sample35,sample40,sample9,sample63,sample77,sample66,sample6,sample36
chr20	379924	384554	3.59782	0.786429	4.57488	6.58717e-13	3.00791e-11	46	sample43,sample10,sample27,sample5,sample42,sample33,sample1,sample2,sample65,sample51,sample47,sample69,sample32,sample46,sample31,sample3,sample48,sample75,sample62,sample49,sample17,sample68,sample34,sample30,sample76,sample58,sample26,sample74,sample56,sample72,sample64,sample44,sample29,sample35,sample18,sample40,sample50,sample9,sample63,sample53,sample77,sample38,sample61,sample6,sample37,…
chr8	101407618	101409112	3.07389	0.890581	3.45156	6.66296e-13	3.03891e-11	27	sample33,sample1,sample55,sample4,sample2,sample65,sample51,sample47,sample69,sample54,sample46,sample31,sample48,sample62,sample49,sample17,sample76,sample58,sample44,sample35,sample18,sample9,sample63,sample73,sample77,sample6,sample36
chr2	135146533	135156799	3.85353	1.64638	2.34061	6.75167e-13	3.07572e-11	42	sample10,sample27,sample5,sample1,sample55,sample51,sample47,sample69,sample54,sample32,sample31,sample48,sample75,sample7,sample62,sample49,sample17,sample30,sample76,sample58,sample28,sample26,sample74,sample70,sample59,sample56,sample72,sample64,sample44,sample35,sample40,sample50,sample9,sample63,sample73,sample53,sample77,sample66,sample61,sample6,sample37,sample36
chr1	207927563	207929910	2.77978	1.3574	2.04787	6.77483e-13	3.07899e-11	16	sample33,sample65,sample51,sample47,sample69,sample17,sample68,sample30,sample59,sample64,sample29,sample35,sample9,sample63,sample77,sample66
chr2	225008739	225013212	3.22163	1.1329	2.84371	7.03245e-13	3.18105e-11	41	sample43,sample5,sample42,sample33,sample1,sample65,sample51,sample47,sample69,sample54,sample32,sample31,sample48,sample7,sample62,sample49,sample17,sample68,sample76,sample58,sample28,sample74,sample70,sample59,sample56,sample72,sample64,sample44,sample29,sample35,sample18,sample40,sample50,sample9,sample73,sample53,sample77,sample66,sample6,sample37,sample36
chr8	76235985	76237226	2.98544	0.754723	3.95568	7.16709e-13	3.23435e-11	36	sample10,sample5,sample42,sample33,sample4,sample2,sample51,sample47,sample69,sample54,sample32,sample31,sample75,sample62,sample49,sample17,sample68,sample30,sample76,sample58,sample74,sample70,sample59,sample56,sample72,sample64,sample29,sample35,sample40,sample50,sample9,sample63,sample73,sample77,sample66,sample6
chr6	151445344	151449042	1.99477	0.54984	3.62791	7.33655e-13	3.29537e-11	25	sample5,sample33,sample1,sample47,sample69,sample32,sample31,sample75,sample62,sample49,sample17,sample68,sample30,sample76,sample58,sample56,sample64,sample35,sample40,sample50,sample63,sample77,sample6,sample37,sample36
chr1	213740557	213748861	2.55961	0.530252	4.82717	7.35835e-13	3.30131e-11	36	sample10,sample5,sample1,sample65,sample51,sample69,sample54,sample46,sample31,sample3,sample48,sample62,sample49,sample17,sample30,sample76,sample58,sample70,sample59,sample56,sample72,sample64,sample44,sample29,sample35,sample40,sample50,sample9,sample63,sample73,sample53,sample66,sample61,sample6,sample37,sample36
chr7	7215171	7217871	2.21843	0.294114	7.54277	7.40326e-13	3.31373e-11	36	sample5,sample33,sample1,sample55,sample2,sample65,sample51,sample47,sample69,sample54,sample46,sample31,sample48,sample75,sample62,sample49,sample17,sample30,sample76,sample58,sample59,sample56,sample64,sample44,sample29,sample35,sample40,sample50,sample9,sample63,sample53,sample77,sample66,sample6,sample37,sample36
chr17	60255851	60257809	2.80461	1.00424	2.79277	7.4324e-13	3.32291e-11	31	sample5,sample33,sample1,sample55,sample65,sample51,sample47,sample69,sample31,sample48,sample75,sample62,sample49,sample17,sample68,sample30,sample76,sample58,sample56,sample72,sample64,sample44,sample29,sample35,sample18,sample40,sample50,sample9,sample63,sample6,sample36
chr5	131849120	131850101	2.13793	0.317387	6.73604	7.52129e-13	3.35098e-11	20	sample10,sample1,sample51,sample47,sample54,sample48,sample75,sample62,sample17,sample76,sample58,sample59,sample56,sample72,sample35,sample9,sample63,sample73,sample77,sample36
chr1	88776676	88778213	1.83646	0.592933	3.09726	7.56005e-13	3.36047e-11	14	sample33,sample51,sample47,sample54,sample31,sample48,sample17,sample34,sample58,sample59,sample35,sample63,sample77,sample36
chr9	110005410	110007683	1.91607	0.689237	2.77998	8.01617e-13	3.55911e-11	23	sample33,sample1,sample65,sample47,sample69,sample46,sample31,sample48,sample62,sample17,sample68,sample30,sample58,sample59,sample56,sample64,sample44,sample35,sample50,sample73,sample77,sample6,sample36
chr22	33175125	33176861	2.11317	0.669236	3.15759	8.05164e-13	3.57074e-11	30	sample5,sample1,sample55,sample65,sample51,sample47,sample69,sample54,sample46,sample31,sample48,sample62,sample49,sample17,sample30,sample76,sample58,sample74,sample72,sample64,sample44,sample29,sample35,sample40,sample9,sample63,sample73,sample66,sample6,sample36
chr6	150739782	150740854	3.25449	2.00567	1.62265	8.0641e-13	3.57215e-11	15	sample33,sample1,sample2,sample65,sample31,sample75,sample76,sample74,sample72,sample18,sample9,sample53,sample77,sample60,sample6
chr1	48406314	48408278	1.78883	0.670281	2.66878	8.07104e-13	3.57111e-11	15	sample1,sample2,sample65,sample51,sample47,sample69,sample31,sample30,sample58,sample72,sample29,sample35,sample9,sample77,sample66
chr11	116063342	116066306	3.39125	0.905096	3.74684	8.07591e-13	3.56507e-11	36	sample10,sample5,sample1,sample55,sample4,sample23,sample51,sample47,sample69,sample31,sample48,sample75,sample7,sample62,sample49,sample17,sample68,sample30,sample76,sample58,sample26,sample74,sample59,sample56,sample72,sample64,sample44,sample35,sample50,sample9,sample63,sample73,sample53,sample77,sample6,sample36
chr2	159395078	159396683	2.37619	1.23849	1.91862	8.2174e-13	3.61923e-11	18	sample10,sample1,sample51,sample47,sample69,sample54,sample32,sample31,sample49,sample17,sample30,sample58,sample59,sample64,sample50,sample66,sample6,sample36
chr7	24864160	24874514	2.87873	1.65773	1.73655	8.38179e-13	3.679e-11	43	sample5,sample42,sample45,sample33,sample1,sample55,sample4,sample51,sample47,sample69,sample54,sample31,sample3,sample48,sample75,sample7,sample62,sample49,sample17,sample76,sample58,sample28,sample26,sample74,sample70,sample59,sample56,sample64,sample44,sample29,sample35,sample18,sample40,sample50,sample9,sample63,sample73,sample53,sample77,sample66,sample6,sample37,sample36
chr6	160693244	160695419	1.78464	0.325698	5.47942	8.61285e-13	3.76754e-11	18	sample10,sample5,sample1,sample47,sample48,sample62,sample49,sample58,sample59,sample44,sample35,sample40,sample50,sample9,sample77,sample66,sample37,sample36
chr1	229264146	229269647	5.77675	1.93591	2.98399	8.82288e-13	3.8463e-11	48	sample5,sample42,sample33,sample1,sample55,sample4,sample65,sample51,sample47,sample69,sample54,sample32,sample46,sample31,sample48,sample75,sample62,sample49,sample17,sample34,sample30,sample76,sample58,sample28,sample26,sample74,sample70,sample59,sample56,sample72,sample64,sample44,sample29,sample35,sample18,sample40,sample50,sample9,sample63,sample73,sample53,sample77,sample38,sample66,sample6…
chr15	89642943	89646234	2.74711	1.38094	1.98931	8.83266e-13	3.8462e-11	28	sample10,sample27,sample5,sample33,sample1,sample2,sample51,sample47,sample69,sample54,sample31,sample48,sample75,sample49,sample17,sample34,sample58,sample16,sample64,sample44,sample29,sample18,sample40,sample53,sample77,sample60,sample6,sample36
chr7	37009249	37012506	1.90078	0.61557	3.08784	8.8433e-13	3.84649e-11	18	sample55,sample65,sample51,sample69,sample31,sample62,sample49,sample68,sample58,sample64,sample44,sample35,sample40,sample63,sample73,sample61,sample6,sample36
chr7	98759663	98761171	3.06013	0.970566	3.15294	8.85458e-13	3.84705e-11	35	sample10,sample33,sample1,sample65,sample51,sample47,sample69,sample54,sample46,sample31,sample48,sample75,sample62,sample49,sample17,sample76,sample58,sample28,sample59,sample56,sample72,sample64,sample44,sample29,sample35,sample40,sample50,sample9,sample63,sample73,sample77,sample66,sample61,sample6,sample36
chr18	10139153	10142998	2.36188	1.01701	2.32238	9.08781e-13	3.93948e-11	30	sample43,sample5,sample1,sample2,sample65,sample47,sample69,sample31,sample48,sample75,sample39,sample7,sample62,sample49,sample17,sample68,sample76,sample58,sample64,sample44,sample35,sample18,sample40,sample50,sample9,sample63,sample73,sample53,sample77,sample36
chr7	36300898	36306552	3.18637	1.59227	2.00115	9.15273e-13	3.96316e-11	40	sample10,sample42,sample45,sample1,sample65,sample51,sample47,sample69,sample32,sample46,sample31,sample48,sample75,sample62,sample49,sample17,sample68,sample30,sample76,sample58,sample28,sample74,sample59,sample56,sample72,sample64,sample44,sample35,sample18,sample40,sample50,sample9,sample63,sample73,sample53,sample77,sample66,sample6,sample37,sample36
chr14	65720984	65725947	3.46118	1.65502	2.09132	9.17208e-13	3.96708e-11	35	sample10,sample33,sample1,sample55,sample51,sample47,sample69,sample54,sample32,sample31,sample3,sample48,sample75,sample62,sample49,sample17,sample34,sample58,sample26,sample74,sample70,sample59,sample64,sample29,sample35,sample18,sample40,sample9,sample63,sample73,sample77,sample66,sample6,sample37,sample36
chr3	101913275	101915484	2.17562	0.831791	2.61558	9.18999e-13	3.97036e-11	16	sample10,sample2,sample51,sample47,sample69,sample31,sample48,sample49,sample58,sample64,sample35,sample50,sample73,sample77,sample6,sample36
chr10	63518878	63524087	2.9017	1.20793	2.40221	9.22713e-13	3.98194e-11	38	sample43,sample5,sample42,sample45,sample33,sample1,sample65,sample51,sample47,sample69,sample54,sample46,sample31,sample48,sample62,sample49,sample17,sample30,sample76,sample58,sample28,sample57,sample70,sample59,sample56,sample64,sample44,sample29,sample35,sample40,sample50,sample9,sample73,sample53,sample77,sample66,sample37,sample36
chr1	109407238	109409898	2.58875	0.941242	2.75036	9.28105e-13	4.00072e-11	33	sample10,sample5,sample1,sample4,sample65,sample51,sample47,sample69,sample54,sample32,sample31,sample48,sample75,sample62,sample49,sample17,sample30,sample76,sample58,sample59,sample56,sample72,sample64,sample44,sample35,sample40,sample9,sample63,sample73,sample66,sample61,sample6,sample36
chr4	184351465	184353095	2.47512	1.17888	2.09955	9.34915e-13	4.02107e-11	22	sample10,sample55,sample47,sample69,sample46,sample31,sample48,sample62,sample49,sample17,sample68,sample30,sample76,sample58,sample59,sample56,sample64,sample9,sample77,sample66,sample61,sample36
chr12	76097187	76101502	1.56714	0.506034	3.0969	9.37053e-13	4.02577e-11	17	sample1,sample2,sample47,sample69,sample54,sample46,sample31,sample48,sample49,sample58,sample44,sample35,sample9,sample73,sample66,sample37,sample36
chr16	72236031	72238261	2.86646	1.55244	1.84643	9.38132e-13	4.02591e-11	20	sample43,sample45,sample4,sample65,sample47,sample69,sample31,sample48,sample62,sample49,sample17,sample34,sample72,sample64,sample35,sample73,sample53,sample66,sample61,sample36
chr4	25300097	25303360	2.52593	0.951498	2.65469	9.45171e-13	4.0516e-11	31	sample10,sample33,sample1,sample2,sample65,sample51,sample47,sample69,sample54,sample31,sample48,sample62,sample49,sample17,sample68,sample30,sample76,sample58,sample74,sample59,sample64,sample44,sample35,sample40,sample9,sample63,sample73,sample66,sample61,sample6,sample36
chr1	23513999	23516038	2.22158	0.811036	2.73918	9.51528e-13	4.07432e-11	21	sample10,sample33,sample1,sample55,sample2,sample47,sample69,sample31,sample75,sample62,sample49,sample72,sample64,sample18,sample40,sample50,sample63,sample53,sample77,sample66,sample6
chr1	183128475	183130023	4.0102	1.69338	2.36816	9.53595e-13	4.07863e-11	34	sample42,sample33,sample1,sample65,sample51,sample47,sample69,sample54,sample46,sample31,sample48,sample75,sample62,sample68,sample58,sample28,sample70,sample59,sample56,sample72,sample64,sample29,sample35,sample18,sample40,sample50,sample9,sample63,sample73,sample53,sample77,sample66,sample6,sample36
chr20	48289684	48296417	5.4628	3.03396	1.80055	9.59746e-13	4.10038e-11	32	sample5,sample45,sample67,sample33,sample1,sample55,sample51,sample47,sample69,sample54,sample32,sample31,sample75,sample62,sample17,sample34,sample28,sample59,sample56,sample64,sample44,sample35,sample40,sample50,sample9,sample63,sample73,sample77,sample66,sample6,sample37,sample36
chr5	55829505	55830843	2.72958	0.597182	4.57076	9.62517e-13	4.10766e-11	22	sample33,sample1,sample2,sample51,sample47,sample69,sample54,sample46,sample31,sample48,sample49,sample17,sample58,sample28,sample59,sample72,sample29,sample35,sample40,sample9,sample77,sample36
chr11	46237771	46238650	3.00417	1.2243	2.45378	9.92745e-13	4.22262e-11	17	sample10,sample4,sample51,sample47,sample69,sample54,sample62,sample49,sample17,sample58,sample28,sample40,sample63,sample73,sample77,sample66,sample36
chr1	43837228	43840446	2.097	0.725688	2.88966	9.98816e-13	4.24376e-11	23	sample10,sample33,sample1,sample2,sample51,sample47,sample48,sample7,sample49,sample17,sample34,sample76,sample58,sample64,sample44,sample29,sample35,sample18,sample50,sample9,sample63,sample77,sample36
chr21	45031372	45033267	3.81266	1.9164	1.98949	1.00476e-12	4.25962e-11	23	sample43,sample5,sample42,sample33,sample1,sample55,sample51,sample47,sample69,sample75,sample7,sample62,sample59,sample56,sample72,sample64,sample35,sample18,sample9,sample53,sample61,sample6,sample37
chr21	37291561	37298083	1.58777	0.539417	2.94349	1.00959e-12	4.27066e-11	14	sample1,sample65,sample47,sample46,sample48,sample75,sample49,sample17,sample58,sample35,sample73,sample53,sample37,sample36
chr11	69793783	69797048	3.38555	0.968011	3.49743	1.01366e-12	4.28318e-11	37	sample43,sample10,sample5,sample42,sample33,sample1,sample4,sample2,sample65,sample51,sample47,sample69,sample54,sample46,sample31,sample48,sample75,sample7,sample34,sample58,sample26,sample74,sample70,sample59,sample56,sample72,sample64,sample29,sample35,sample18,sample40,sample9,sample63,sample77,sample66,sample61,sample37
chr16	15765533	15768408	4.68289	2.99112	1.5656	1.0157e-12	4.28711e-11	20	sample80,sample10,sample67,sample47,sample75,sample19,sample49,sample17,sample68,sample34,sample76,sample58,sample59,sample64,sample44,sample35,sample53,sample77,sample66,sample36
chr10	5332839	5336826	4.14975	2.31143	1.79532	1.02054e-12	4.29339e-11	32	sample80,sample10,sample5,sample45,sample67,sample33,sample1,sample4,sample2,sample51,sample47,sample32,sample31,sample75,sample7,sample68,sample34,sample30,sample76,sample58,sample28,sample59,sample56,sample72,sample64,sample44,sample35,sample50,sample9,sample73,sample77,sample37
chrX	46175364	46189164	3.04786	0.574294	5.30714	1.04143e-12	4.36221e-11	43	sample43,sample10,sample5,sample33,sample1,sample55,sample2,sample65,sample51,sample47,sample69,sample32,sample46,sample31,sample48,sample75,sample62,sample49,sample17,sample68,sample30,sample76,sample58,sample28,sample59,sample56,sample64,sample44,sample29,sample35,sample18,sample40,sample50,sample9,sample63,sample73,sample53,sample77,sample66,sample61,sample6,sample37,sample36
chr5	17118358	17119850	2.74626	1.41776	1.93704	1.04485e-12	4.37178e-11	17	sample33,sample1,sample2,sample51,sample47,sample31,sample48,sample75,sample49,sample58,sample56,sample64,sample18,sample9,sample77,sample66,sample6
chr4	113030573	113031348	2.32406	0.905701	2.56603	1.0457e-12	4.37059e-11	14	sample10,sample33,sample2,sample69,sample31,sample48,sample49,sample68,sample64,sample35,sample9,sample73,sample77,sample36
chr1	162216082	162219967	2.12159	0.833425	2.54563	1.05305e-12	4.39176e-11	29	sample33,sample1,sample65,sample51,sample47,sample69,sample54,sample31,sample48,sample62,sample49,sample17,sample30,sample58,sample59,sample56,sample64,sample35,sample40,sample50,sample9,sample63,sample53,sample77,sample66,sample61,sample6,sample37,sample36
chr12	63291510	63294789	1.76751	0.529721	3.33669	1.06267e-12	4.4271e-11	20	sample10,sample5,sample65,sample51,sample47,sample69,sample32,sample31,sample75,sample17,sample30,sample76,sample56,sample64,sample40,sample50,sample9,sample63,sample73,sample6
chr3	14464095	14467958	2.49407	1.60835	1.5507	1.07415e-12	4.47008e-11	15	sample10,sample1,sample2,sample47,sample48,sample75,sample49,sample17,sample64,sample9,sample73,sample77,sample66,sample6,sample36
chr9	109681176	109685348	4.75388	2.47361	1.92184	1.07496e-12	4.46862e-11	33	sample5,sample1,sample55,sample4,sample51,sample47,sample69,sample54,sample32,sample31,sample3,sample48,sample62,sample17,sample76,sample58,sample28,sample26,sample74,sample59,sample56,sample64,sample44,sample35,sample40,sample50,sample9,sample73,sample53,sample77,sample38,sample37,sample36
chr2	11969246	11970983	3.75928	2.07932	1.80794	1.08889e-12	4.51192e-11	26	sample33,sample1,sample2,sample51,sample47,sample31,sample48,sample75,sample62,sample17,sample34,sample76,sample58,sample26,sample72,sample16,sample64,sample35,sample18,sample9,sample73,sample53,sample77,sample60,sample6,sample36
chr20	34670113	34677119	5.17129	2.06352	2.50605	1.08924e-12	4.5085e-11	45	sample27,sample5,sample42,sample45,sample33,sample1,sample55,sample4,sample2,sample51,sample47,sample69,sample54,sample32,sample31,sample75,sample62,sample49,sample17,sample30,sample76,sample58,sample28,sample74,sample59,sample56,sample72,sample64,sample44,sample29,sample35,sample18,sample40,sample50,sample9,sample63,sample73,sample53,sample77,sample38,sample66,sample61,sample6,sample37,sample36
chr1	150500668	150507018	4.70518	2.18273	2.15564	1.09546e-12	4.52937e-11	42	sample5,sample1,sample55,sample4,sample65,sample51,sample69,sample54,sample32,sample31,sample3,sample48,sample75,sample39,sample62,sample17,sample34,sample76,sample58,sample28,sample26,sample74,sample70,sample59,sample56,sample72,sample64,sample44,sample35,sample18,sample40,sample50,sample9,sample63,sample73,sample53,sample77,sample66,sample61,sample6,sample37,sample36
chr20	14447465	14448490	2.86445	1.1741	2.43969	1.09617e-12	4.52747e-11	27	sample10,sample33,sample51,sample47,sample69,sample54,sample32,sample31,sample49,sample68,sample76,sample58,sample74,sample56,sample72,sample64,sample35,sample18,sample40,sample50,sample9,sample63,sample73,sample53,sample77,sample37,sample36
chr5	153636313	153640139	1.82682	0.313914	5.81949	1.09903e-12	4.53439e-11	19	sample10,sample1,sample69,sample31,sample62,sample49,sample17,sample58,sample64,sample35,sample40,sample50,sample9,sample63,sample73,sample66,sample61,sample6,sample36
chr11	86450667	86455527	2.53038	1.28533	1.96866	1.09959e-12	4.53187e-11	27	sample80,sample10,sample33,sample1,sample55,sample2,sample47,sample69,sample46,sample31,sample48,sample75,sample39,sample49,sample34,sample76,sample58,sample74,sample56,sample16,sample44,sample29,sample35,sample18,sample50,sample77,sample60
chr1	229364747	229368035	3.18158	0.844562	3.76714	1.11103e-12	4.56924e-11	35	sample10,sample1,sample65,sample51,sample47,sample69,sample54,sample46,sample31,sample48,sample62,sample49,sample17,sample34,sample30,sample76,sample58,sample28,sample59,sample56,sample72,sample64,sample44,sample35,sample18,sample40,sample50,sample9,sample63,sample73,sample53,sample77,sample66,sample61,sample36
chr4	90043023	90045884	2.72923	0.889196	3.06933	1.11934e-12	4.59849e-11	32	sample10,sample33,sample1,sample2,sample51,sample47,sample69,sample32,sample46,sample31,sample3,sample48,sample62,sample49,sample30,sample76,sample59,sample56,sample72,sample64,sample35,sample40,sample50,sample9,sample63,sample73,sample77,sample66,sample61,sample6,sample37,sample36
chr16	86059215	86063776	3.52324	1.37709	2.55846	1.13074e-12	4.64037e-11	37	sample5,sample1,sample55,sample65,sample51,sample47,sample69,sample32,sample31,sample3,sample48,sample75,sample62,sample49,sample17,sample68,sample30,sample76,sample58,sample26,sample74,sample56,sample72,sample64,sample44,sample35,sample18,sample50,sample9,sample63,sample73,sample53,sample77,sample66,sample61,sample6,sample36
chr12	50335905	50341341	3.71674	1.75541	2.1173	1.13454e-12	4.651e-11	37	sample10,sample5,sample42,sample1,sample55,sample4,sample2,sample65,sample51,sample47,sample69,sample54,sample32,sample31,sample3,sample48,sample75,sample49,sample17,sample34,sample76,sample58,sample28,sample26,sample74,sample72,sample64,sample29,sample35,sample9,sample63,sample53,sample77,sample66,sample61,sample37,sample36
chr7	36746483	36749487	2.29576	0.508325	4.51633	1.14162e-12	4.67507e-11	29	sample43,sample10,sample42,sample1,sample55,sample65,sample51,sample47,sample46,sample31,sample48,sample75,sample62,sample49,sample17,sample68,sample30,sample76,sample58,sample72,sample64,sample44,sample35,sample40,sample50,sample63,sample61,sample6,sample36
chr16	31887524	31890179	4.13043	2.29543	1.79941	1.18697e-12	4.80958e-11	24	sample10,sample5,sample45,sample1,sample4,sample2,sample47,sample69,sample32,sample46,sample75,sample39,sample7,sample34,sample76,sample58,sample59,sample16,sample64,sample29,sample50,sample53,sample77,sample66
chr9	111453159	111454836	3.00898	1.21162	2.48343	1.19616e-12	4.84173e-11	29	sample43,sample5,sample1,sample2,sample51,sample47,sample69,sample32,sample31,sample3,sample48,sample62,sample49,sample17,sample30,sample58,sample28,sample70,sample59,sample56,sample64,sample35,sample40,sample9,sample53,sample77,sample66,sample6,sample36
chr11	67329171	67332164	2.15211	0.867125	2.48189	1.21261e-12	4.89289e-11	20	sample5,sample33,sample2,sample47,sample69,sample31,sample49,sample76,sample58,sample59,sample56,sample64,sample18,sample40,sample50,sample9,sample63,sample77,sample66,sample36
chr11	59455527	59457381	2.48997	0.717601	3.46985	1.22294e-12	4.92939e-11	31	sample5,sample1,sample65,sample47,sample69,sample32,sample31,sample48,sample75,sample62,sample49,sample17,sample68,sample30,sample76,sample74,sample59,sample56,sample72,sample44,sample35,sample40,sample50,sample9,sample63,sample73,sample53,sample66,sample6,sample37,sample36
chr8	133723789	133725413	1.73244	0.210569	8.2274	1.24219e-12	4.97573e-11	16	sample65,sample69,sample31,sample48,sample49,sample17,sample30,sample58,sample59,sample35,sample40,sample9,sample63,sample77,sample6,sample36
chr2	126453184	126455860	1.66818	0.551323	3.02578	1.24454e-12	4.97996e-11	26	sample65,sample51,sample47,sample69,sample54,sample32,sample46,sample31,sample48,sample49,sample17,sample30,sample58,sample28,sample70,sample59,sample64,sample44,sample35,sample40,sample9,sample63,sample73,sample66,sample61,sample36
chr1	223841294	223844508	2.55916	0.972495	2.63154	1.28579e-12	5.12371e-11	27	sample10,sample33,sample1,sample51,sample47,sample69,sample54,sample46,sample48,sample49,sample17,sample76,sample58,sample70,sample59,sample56,sample64,sample44,sample18,sample40,sample9,sample63,sample73,sample77,sample66,sample6,sample36
chr6	75243860	75245065	1.92583	0.635633	3.02979	1.29641e-12	5.1607e-11	14	sample33,sample32,sample31,sample62,sample49,sample30,sample59,sample64,sample35,sample40,sample66,sample61,sample37,sample36
chr2	182649402	182657130	2.21491	1.0543	2.10083	1.31673e-12	5.23619e-11	37	sample10,sample5,sample45,sample33,sample1,sample2,sample51,sample47,sample69,sample54,sample31,sample48,sample62,sample49,sample17,sample68,sample30,sample76,sample58,sample28,sample59,sample56,sample64,sample44,sample29,sample35,sample18,sample40,sample50,sample9,sample73,sample53,sample77,sample66,sample6,sample37,sample36
chr14	50479179	50481446	2.96876	0.957474	3.10061	1.31982e-12	5.24305e-11	34	sample10,sample42,sample33,sample1,sample55,sample2,sample65,sample51,sample47,sample69,sample54,sample46,sample31,sample48,sample75,sample62,sample49,sample17,sample30,sample76,sample58,sample59,sample56,sample64,sample35,sample40,sample9,sample63,sample73,sample53,sample66,sample6,sample37,sample36
chr6	3825537	3826922	4.0194	1.86474	2.15547	1.33811e-12	5.31021e-11	35	sample80,sample10,sample33,sample2,sample23,sample51,sample47,sample69,sample32,sample46,sample31,sample48,sample75,sample39,sample62,sample49,sample30,sample76,sample74,sample56,sample72,sample16,sample64,sample44,sample35,sample18,sample40,sample50,sample63,sample53,sample77,sample66,sample60,sample6,sample36
chr12	53811714	53816068	3.05387	1.43316	2.13086	1.3416e-12	5.31859e-11	39	sample10,sample5,sample42,sample33,sample1,sample4,sample2,sample51,sample47,sample69,sample54,sample32,sample46,sample31,sample3,sample48,sample75,sample62,sample17,sample68,sample34,sample58,sample28,sample26,sample70,sample59,sample56,sample64,sample29,sample18,sample9,sample63,sample73,sample53,sample77,sample66,sample6,sample37,sample36
chr12	58817709	58820716	3.53965	1.54378	2.29284	1.34162e-12	5.31322e-11	36	sample80,sample10,sample5,sample45,sample67,sample33,sample2,sample51,sample47,sample69,sample46,sample31,sample48,sample75,sample39,sample7,sample49,sample17,sample68,sample34,sample76,sample74,sample59,sample64,sample44,sample29,sample35,sample18,sample40,sample9,sample63,sample73,sample77,sample61,sample37,sample36
chr10	3136667	3139382	2.20035	1.3118	1.67735	1.35648e-12	5.35551e-11	21	sample33,sample55,sample2,sample47,sample69,sample31,sample48,sample75,sample49,sample68,sample34,sample76,sample58,sample74,sample64,sample18,sample40,sample77,sample66,sample6,sample36
chr12	13808429	13811125	1.76405	0.255176	6.91307	1.35733e-12	5.35339e-11	17	sample65,sample47,sample69,sample46,sample48,sample62,sample49,sample17,sample76,sample56,sample72,sample64,sample35,sample50,sample63,sample6,sample36
chr15	69420897	69421783	2.19777	0.757215	2.90243	1.38111e-12	5.43049e-11	16	sample10,sample1,sample65,sample47,sample69,sample31,sample62,sample49,sample30,sample58,sample64,sample35,sample73,sample66,sample6,sample36
chr13	31401985	31410915	5.87321	1.20397	4.87822	1.38397e-12	5.43617e-11	55	sample10,sample5,sample42,sample45,sample67,sample33,sample1,sample55,sample4,sample2,sample65,sample23,sample51,sample47,sample69,sample54,sample32,sample46,sample31,sample3,sample48,sample75,sample7,sample62,sample49,sample17,sample68,sample30,sample76,sample58,sample28,sample26,sample74,sample70,sample59,sample56,sample72,sample64,sample44,sample35,sample18,sample40,sample50,sample9,sample63,s…
chr1	211907899	211909804	1.99819	0.646467	3.09094	1.42291e-12	5.57206e-11	18	sample10,sample33,sample1,sample2,sample51,sample47,sample69,sample31,sample48,sample49,sample58,sample44,sample18,sample9,sample77,sample66,sample6,sample37
chr6	160657679	160661687	2.99562	1.07408	2.78901	1.42913e-12	5.59074e-11	36	sample10,sample5,sample33,sample1,sample65,sample51,sample47,sample69,sample32,sample31,sample62,sample49,sample17,sample34,sample30,sample76,sample58,sample28,sample70,sample59,sample56,sample72,sample64,sample44,sample29,sample35,sample40,sample50,sample9,sample53,sample77,sample66,sample61,sample6,sample37,sample36
chr8	119908290	119910754	1.87781	0.494277	3.7991	1.43966e-12	5.62623e-11	15	sample33,sample4,sample51,sample46,sample49,sample76,sample58,sample64,sample29,sample35,sample40,sample9,sample63,sample61,sample36
chr17	40175093	40177559	4.93856	2.87895	1.71541	1.44585e-12	5.64469e-11	19	sample33,sample1,sample55,sample4,sample2,sample47,sample75,sample62,sample34,sample59,sample72,sample64,sample44,sample35,sample18,sample9,sample73,sample77,sample36
chr20	52748138	52751182	3.77464	0.936625	4.03005	1.4602e-12	5.68916e-11	35	sample5,sample33,sample1,sample55,sample4,sample2,sample65,sample47,sample69,sample54,sample32,sample46,sample31,sample48,sample75,sample7,sample62,sample49,sample17,sample30,sample59,sample64,sample44,sample35,sample18,sample40,sample50,sample63,sample73,sample53,sample77,sample66,sample6,sample37,sample36
chr17	70575435	70578877	3.2246	0.955628	3.37432	1.4603e-12	5.68379e-11	42	sample10,sample5,sample33,sample55,sample2,sample65,sample51,sample47,sample69,sample54,sample32,sample46,sample31,sample48,sample75,sample62,sample49,sample17,sample34,sample30,sample76,sample58,sample28,sample74,sample59,sample72,sample64,sample44,sample29,sample35,sample18,sample40,sample50,sample9,sample63,sample73,sample53,sample77,sample66,sample6,sample37,sample36
chr17	70656745	70658558	2.23935	0.5555	4.03122	1.47852e-12	5.73155e-11	24	sample10,sample33,sample55,sample65,sample51,sample47,sample69,sample31,sample75,sample49,sample17,sample34,sample58,sample70,sample72,sample64,sample44,sample18,sample50,sample9,sample73,sample53,sample77,sample36
chrX	122936027	122939740	2.16216	0.784623	2.75567	1.48149e-12	5.73729e-11	28	sample33,sample1,sample55,sample2,sample51,sample47,sample69,sample31,sample75,sample62,sample49,sample17,sample30,sample58,sample59,sample56,sample72,sample64,sample44,sample29,sample35,sample40,sample50,sample63,sample77,sample66,sample6,sample36
chr7	26027801	26030955	2.46197	0.702722	3.50348	1.50839e-12	5.82388e-11	32	sample10,sample5,sample1,sample4,sample65,sample51,sample47,sample69,sample54,sample31,sample48,sample62,sample49,sample17,sample30,sample76,sample58,sample28,sample59,sample72,sample64,sample44,sample35,sample40,sample50,sample63,sample73,sample53,sample66,sample61,sample6,sample36
chr7	130666339	130686424	4.67674	2.31878	2.0169	1.51178e-12	5.83109e-11	43	sample10,sample5,sample45,sample33,sample1,sample55,sample4,sample51,sample47,sample69,sample54,sample31,sample3,sample48,sample75,sample62,sample49,sample17,sample34,sample79,sample30,sample76,sample58,sample28,sample74,sample70,sample59,sample72,sample64,sample44,sample29,sample35,sample40,sample9,sample63,sample73,sample53,sample77,sample66,sample61,sample6,sample37,sample36
chr3	148316900	148322744	3.29332	1.39615	2.35886	1.52517e-12	5.86511e-11	40	sample5,sample33,sample1,sample55,sample65,sample51,sample47,sample69,sample54,sample32,sample31,sample48,sample75,sample62,sample49,sample68,sample30,sample76,sample58,sample28,sample74,sample59,sample56,sample72,sample64,sample44,sample29,sample35,sample40,sample50,sample9,sample63,sample73,sample53,sample77,sample66,sample61,sample6,sample37,sample36
chr2	235787581	235791285	1.947	0.518855	3.75249	1.55803e-12	5.98552e-11	25	sample1,sample65,sample47,sample69,sample32,sample31,sample48,sample62,sample49,sample17,sample30,sample76,sample58,sample56,sample64,sample44,sample35,sample50,sample9,sample73,sample77,sample66,sample61,sample6,sample36
chr12	63284662	63287884	1.60765	0.315096	5.1021	1.58785e-12	6.08187e-11	14	sample5,sample65,sample69,sample32,sample31,sample62,sample17,sample76,sample64,sample40,sample63,sample6,sample37,sample36
chr1	43444489	43447784	3.27602	1.33886	2.44688	1.61481e-12	6.17896e-11	37	sample10,sample5,sample33,sample1,sample55,sample51,sample47,sample69,sample31,sample3,sample48,sample75,sample7,sample62,sample49,sample17,sample76,sample58,sample28,sample74,sample70,sample59,sample56,sample72,sample64,sample35,sample18,sample40,sample50,sample9,sample63,sample73,sample53,sample77,sample66,sample6,sample36
chr17	39112015	39115639	1.95562	0.257068	7.60739	1.63104e-12	6.2287e-11	20	sample5,sample33,sample1,sample2,sample65,sample69,sample31,sample48,sample75,sample62,sample49,sample17,sample76,sample64,sample35,sample40,sample50,sample9,sample63,sample36
chr3	112405310	112409623	2.27427	0.30381	7.48581	1.63279e-12	6.22922e-11	27	sample10,sample1,sample65,sample51,sample47,sample69,sample32,sample46,sample62,sample49,sample17,sample76,sample58,sample56,sample64,sample44,sample29,sample35,sample40,sample50,sample9,sample63,sample73,sample77,sample61,sample6,sample36
chr2	186728981	186730027	1.84451	0.292855	6.29838	1.63824e-12	6.24382e-11	17	sample10,sample5,sample65,sample51,sample47,sample54,sample32,sample31,sample48,sample75,sample58,sample59,sample64,sample50,sample9,sample63,sample36
chr1	236071699	236074519	2.03414	0.707963	2.87323	1.64015e-12	6.24491e-11	18	sample33,sample1,sample2,sample51,sample47,sample46,sample31,sample48,sample7,sample49,sample44,sample29,sample35,sample18,sample9,sample77,sample60,sample36
chr17	41649126	41654084	2.04438	0.531172	3.84881	1.66128e-12	6.31286e-11	34	sample10,sample5,sample1,sample55,sample65,sample51,sample47,sample69,sample46,sample31,sample48,sample75,sample62,sample49,sample17,sample34,sample30,sample76,sample58,sample56,sample72,sample64,sample29,sample35,sample40,sample50,sample9,sample63,sample73,sample77,sample66,sample61,sample6,sample36
chr10	30091912	30095297	2.64016	1.17127	2.25411	1.66546e-12	6.32252e-11	28	sample80,sample10,sample33,sample1,sample2,sample65,sample23,sample47,sample46,sample31,sample48,sample75,sample49,sample76,sample58,sample64,sample44,sample35,sample40,sample50,sample63,sample73,sample77,sample66,sample60,sample6,sample37,sample36
chr17	70923863	70926537	1.74836	0.393612	4.44185	1.69077e-12	6.41228e-11	21	sample33,sample65,sample51,sample47,sample69,sample31,sample62,sample17,sample34,sample76,sample58,sample72,sample64,sample35,sample50,sample9,sample63,sample73,sample77,sample6,sample36
chr3	169040990	169044007	2.62332	1.04489	2.51061	1.71396e-12	6.48108e-11	29	sample10,sample1,sample65,sample51,sample47,sample54,sample46,sample31,sample75,sample49,sample17,sample34,sample79,sample30,sample76,sample58,sample56,sample72,sample64,sample44,sample35,sample40,sample50,sample9,sample63,sample73,sample66,sample6,sample36
chr1	43431409	43433794	2.18754	0.825087	2.65128	1.75041e-12	6.59298e-11	23	sample10,sample33,sample1,sample51,sample47,sample54,sample31,sample49,sample30,sample76,sample70,sample59,sample56,sample72,sample44,sample35,sample18,sample50,sample9,sample77,sample66,sample6,sample36
chr13	31316565	31321716	3.26102	1.93039	1.6893	1.7592e-12	6.61961e-11	32	sample10,sample5,sample45,sample1,sample2,sample65,sample47,sample69,sample48,sample75,sample7,sample62,sample49,sample17,sample34,sample76,sample58,sample26,sample56,sample72,sample64,sample35,sample18,sample40,sample50,sample9,sample63,sample73,sample77,sample66,sample6,sample36
chr11	86302316	86305878	2.725	1.34711	2.02285	1.76385e-12	6.63065e-11	30	sample42,sample33,sample1,sample55,sample51,sample47,sample69,sample54,sample32,sample31,sample75,sample62,sample17,sample30,sample76,sample28,sample59,sample56,sample72,sample64,sample44,sample35,sample40,sample50,sample63,sample73,sample77,sample66,sample6,sample37
chr6	34711263	34715704	3.83902	1.72905	2.2203	1.76958e-12	6.64568e-11	33	sample10,sample5,sample33,sample55,sample4,sample65,sample51,sample47,sample69,sample54,sample31,sample75,sample62,sample17,sample34,sample30,sample58,sample74,sample59,sample72,sample64,sample29,sample35,sample40,sample9,sample63,sample73,sample53,sample77,sample66,sample6,sample37,sample36
chr2	169559733	169563912	3.42625	1.53496	2.23215	1.77206e-12	6.64849e-11	36	sample5,sample1,sample65,sample51,sample69,sample54,sample32,sample31,sample3,sample48,sample75,sample62,sample49,sample17,sample68,sample76,sample58,sample28,sample74,sample70,sample59,sample56,sample72,sample64,sample44,sample35,sample40,sample50,sample9,sample73,sample53,sample77,sample66,sample6,sample37,sample36
chr6	107168695	107170537	1.91953	0.434222	4.42063	1.81376e-12	6.77853e-11	22	sample5,sample1,sample55,sample51,sample47,sample69,sample31,sample49,sample17,sample30,sample58,sample59,sample56,sample64,sample44,sample35,sample40,sample50,sample9,sample77,sample66,sample61
chr15	74273513	74284879	4.33384	2.6664	1.62535	1.81923e-12	6.79239e-11	46	sample80,sample43,sample10,sample5,sample42,sample33,sample1,sample55,sample4,sample2,sample65,sample23,sample51,sample47,sample69,sample54,sample46,sample3,sample48,sample75,sample39,sample62,sample49,sample17,sample34,sample76,sample58,sample26,sample74,sample70,sample56,sample72,sample16,sample64,sample44,sample35,sample18,sample40,sample50,sample73,sample53,sample77,sample60,sample61,sample37…
chr1	87257792	87260159	2.47712	1.2419	1.99462	1.82855e-12	6.81397e-11	23	sample33,sample1,sample47,sample69,sample31,sample75,sample7,sample62,sample49,sample17,sample68,sample34,sample58,sample74,sample59,sample64,sample35,sample9,sample73,sample77,sample66,sample6,sample36
chr13	45626306	45631356	2.50047	0.938934	2.66309	1.84341e-12	6.86271e-11	37	sample10,sample42,sample33,sample1,sample2,sample65,sample51,sample47,sample69,sample54,sample31,sample3,sample48,sample75,sample49,sample17,sample76,sample58,sample70,sample56,sample72,sample16,sample64,sample44,sample29,sample35,sample18,sample40,sample50,sample9,sample63,sample53,sample77,sample66,sample6,sample37,sample36
chr6	166969943	166970996	2.85512	1.46703	1.94619	1.85132e-12	6.88546e-11	16	sample10,sample1,sample51,sample47,sample69,sample54,sample31,sample48,sample49,sample58,sample28,sample72,sample64,sample9,sample77,sample36
chr2	151382072	151386576	1.9814	0.349086	5.67595	1.86105e-12	6.90832e-11	26	sample5,sample42,sample33,sample1,sample2,sample65,sample47,sample69,sample46,sample48,sample62,sample49,sample17,sample76,sample58,sample56,sample64,sample44,sample35,sample18,sample40,sample50,sample77,sample61,sample6,sample36
chr3	149090407	149092342	2.02649	0.855991	2.36742	1.86437e-12	6.91399e-11	16	sample10,sample33,sample1,sample51,sample47,sample54,sample31,sample48,sample75,sample49,sample30,sample76,sample35,sample50,sample63,sample77
chr2	232484089	232488234	3.12626	1.43352	2.18082	1.91947e-12	7.10461e-11	34	sample43,sample42,sample33,sample1,sample55,sample4,sample2,sample23,sample51,sample47,sample69,sample46,sample31,sample3,sample75,sample62,sample49,sample34,sample76,sample28,sample26,sample74,sample70,sample64,sample18,sample40,sample63,sample73,sample53,sample77,sample66,sample60,sample61,sample36
chr20	10545570	10548197	3.87828	0.845182	4.58869	1.92098e-12	7.10338e-11	41	sample43,sample10,sample27,sample5,sample42,sample33,sample1,sample65,sample47,sample69,sample32,sample31,sample48,sample75,sample7,sample62,sample49,sample17,sample68,sample30,sample76,sample58,sample74,sample70,sample59,sample56,sample72,sample64,sample35,sample18,sample40,sample50,sample9,sample63,sample73,sample77,sample60,sample61,sample6,sample37,sample36
chr12	121106833	121109258	3.02171	0.806208	3.74805	1.92235e-12	7.10162e-11	31	sample10,sample5,sample1,sample55,sample51,sample47,sample69,sample54,sample46,sample31,sample3,sample48,sample75,sample62,sample49,sample17,sample30,sample58,sample28,sample74,sample59,sample56,sample72,sample29,sample9,sample63,sample73,sample53,sample66,sample37,sample36
chr6	6850629	6852326	2.79138	1.15117	2.42482	1.92868e-12	7.11134e-11	24	sample10,sample2,sample51,sample47,sample69,sample46,sample3,sample48,sample62,sample17,sample68,sample76,sample58,sample56,sample72,sample64,sample35,sample18,sample50,sample9,sample53,sample77,sample6,sample36
chr20	52737760	52741764	3.11343	0.984609	3.1621	1.97004e-12	7.24997e-11	39	sample27,sample5,sample33,sample1,sample55,sample4,sample2,sample65,sample51,sample47,sample69,sample54,sample32,sample31,sample48,sample75,sample39,sample7,sample62,sample17,sample34,sample30,sample76,sample59,sample56,sample64,sample44,sample35,sample18,sample40,sample50,sample9,sample63,sample53,sample77,sample66,sample6,sample37,sample36
chr21	34574536	34578162	4.11611	2.73108	1.50714	1.97497e-12	7.26118e-11	19	sample42,sample45,sample1,sample55,sample47,sample54,sample75,sample34,sample28,sample26,sample59,sample72,sample35,sample9,sample73,sample77,sample6,sample37,sample36
chr13	45935399	45937635	2.18079	0.603318	3.61465	1.9803e-12	7.27384e-11	15	sample10,sample42,sample33,sample1,sample47,sample17,sample58,sample56,sample35,sample18,sample40,sample9,sample53,sample77,sample36
chr2	235796577	235797773	2.50923	1.36758	1.8348	1.98049e-12	7.26759e-11	16	sample51,sample47,sample69,sample54,sample31,sample75,sample62,sample17,sample58,sample74,sample59,sample50,sample9,sample73,sample6,sample36
chr1	60006257	60011524	2.82424	0.675178	4.18296	1.99356e-12	7.2947e-11	40	sample43,sample10,sample5,sample1,sample55,sample65,sample51,sample47,sample69,sample54,sample32,sample46,sample31,sample48,sample75,sample62,sample49,sample17,sample30,sample76,sample58,sample28,sample74,sample59,sample56,sample72,sample64,sample44,sample35,sample40,sample50,sample9,sample63,sample73,sample53,sample38,sample66,sample61,sample6,sample36
chr19	42973856	42977146	2.41469	1.06247	2.27272	2.04495e-12	7.44732e-11	31	sample10,sample42,sample1,sample65,sample51,sample47,sample69,sample54,sample46,sample31,sample48,sample75,sample62,sample49,sample17,sample30,sample76,sample58,sample74,sample72,sample64,sample44,sample35,sample40,sample9,sample63,sample73,sample66,sample61,sample6,sample36
chr14	70445944	70448695	2.45304	0.402105	6.10049	2.04797e-12	7.45129e-11	31	sample10,sample5,sample1,sample55,sample51,sample47,sample31,sample75,sample62,sample49,sample17,sample30,sample76,sample58,sample74,sample56,sample72,sample64,sample35,sample18,sample40,sample50,sample9,sample63,sample73,sample53,sample38,sample61,sample6,sample37,sample36
chr1	212101169	212104664	4.3424	2.34438	1.85226	2.05561e-12	7.47203e-11	29	sample45,sample1,sample4,sample51,sample47,sample69,sample54,sample32,sample31,sample3,sample48,sample75,sample62,sample17,sample34,sample58,sample28,sample59,sample64,sample29,sample35,sample9,sample73,sample53,sample77,sample66,sample6,sample37,sample36
chr10	63516157	63518184	2.35748	0.86866	2.71393	2.06156e-12	7.47247e-11	29	sample10,sample33,sample1,sample2,sample65,sample51,sample47,sample54,sample32,sample46,sample31,sample48,sample49,sample17,sample30,sample76,sample58,sample59,sample56,sample64,sample44,sample35,sample40,sample50,sample9,sample53,sample77,sample37,sample36
chr2	196408565	196410382	1.87944	0.724643	2.59361	2.06591e-12	7.4812e-11	15	sample5,sample33,sample2,sample51,sample47,sample69,sample31,sample48,sample49,sample58,sample59,sample29,sample35,sample77,sample36
chr9	6247222	6249151	1.62641	0.413166	3.93646	2.07313e-12	7.50029e-11	15	sample10,sample51,sample47,sample69,sample31,sample49,sample68,sample59,sample35,sample40,sample9,sample63,sample53,sample66,sample37
chr20	10578753	10580320	3.3587	1.60077	2.09817	2.10964e-12	7.61805e-11	31	sample10,sample27,sample5,sample42,sample33,sample47,sample69,sample32,sample48,sample75,sample62,sample49,sample17,sample68,sample76,sample58,sample74,sample59,sample56,sample64,sample44,sample29,sample35,sample18,sample40,sample50,sample9,sample53,sample77,sample37,sample36
chr12	50280001	50285931	3.67878	1.38366	2.65873	2.12054e-12	7.65023e-11	38	sample10,sample5,sample1,sample55,sample4,sample65,sample51,sample47,sample69,sample54,sample32,sample31,sample3,sample75,sample62,sample49,sample17,sample30,sample76,sample58,sample26,sample74,sample57,sample72,sample64,sample44,sample35,sample18,sample40,sample9,sample63,sample73,sample53,sample66,sample61,sample6,sample37,sample36
chr3	69164895	69166561	1.70862	0.375282	4.5529	2.14459e-12	7.72254e-11	14	sample1,sample65,sample69,sample31,sample62,sample49,sample17,sample58,sample35,sample50,sample73,sample66,sample61,sample36
chr8	67467518	67469028	2.76362	0.545815	5.0633	2.19319e-12	7.87542e-11	28	sample10,sample42,sample1,sample55,sample65,sample51,sample47,sample46,sample31,sample3,sample48,sample75,sample62,sample49,sample76,sample58,sample56,sample72,sample64,sample44,sample35,sample40,sample50,sample9,sample73,sample77,sample66,sample36
chr14	77769046	77771091	2.10289	0.720581	2.91832	2.20097e-12	7.88864e-11	25	sample10,sample5,sample33,sample1,sample2,sample65,sample47,sample31,sample48,sample75,sample62,sample49,sample17,sample30,sample64,sample44,sample29,sample35,sample18,sample40,sample50,sample9,sample63,sample77,sample36
chr5	127268480	127273054	2.37733	0.800162	2.97107	2.21072e-12	7.91624e-11	32	sample10,sample1,sample51,sample47,sample69,sample54,sample31,sample48,sample62,sample49,sample17,sample68,sample34,sample30,sample76,sample58,sample28,sample70,sample59,sample72,sample64,sample44,sample29,sample35,sample40,sample9,sample63,sample73,sample77,sample66,sample61,sample36
chr20	21163595	21165557	2.12832	0.655356	3.24758	2.22442e-12	7.94311e-11	14	sample80,sample69,sample48,sample76,sample16,sample64,sample35,sample50,sample63,sample77,sample60,sample6,sample37,sample36
chr7	36155046	36157281	2.3811	1.04613	2.27612	2.26695e-12	8.0576e-11	22	sample10,sample33,sample1,sample2,sample51,sample47,sample69,sample46,sample31,sample48,sample7,sample49,sample76,sample74,sample56,sample18,sample50,sample9,sample77,sample60,sample6,sample36
chr5	90514346	90516448	2.2155	0.816563	2.7132	2.28437e-12	8.10455e-11	18	sample10,sample1,sample51,sample47,sample69,sample31,sample48,sample75,sample62,sample17,sample34,sample58,sample64,sample44,sample35,sample73,sample77,sample36
chr2	219595639	219599223	2.39823	1.22431	1.95885	2.29401e-12	8.10888e-11	22	sample10,sample5,sample1,sample2,sample65,sample48,sample7,sample62,sample49,sample17,sample34,sample76,sample64,sample35,sample18,sample50,sample63,sample53,sample77,sample60,sample6,sample36
chr19	15306026	15307414	2.65759	1.16876	2.27385	2.32842e-12	8.21543e-11	21	sample10,sample42,sample1,sample51,sample48,sample75,sample39,sample7,sample62,sample17,sample68,sample76,sample58,sample70,sample59,sample29,sample18,sample9,sample63,sample77,sample36
chr17	65524447	65526065	2.47832	1.22964	2.01548	2.32934e-12	8.21114e-11	18	sample10,sample33,sample65,sample51,sample47,sample69,sample46,sample31,sample48,sample75,sample17,sample76,sample59,sample64,sample44,sample50,sample9,sample77
chr2	85241822	85249120	2.42979	1.2916	1.88122	2.37462e-12	8.34022e-11	35	sample10,sample5,sample33,sample1,sample51,sample47,sample69,sample54,sample32,sample31,sample48,sample75,sample62,sample17,sample79,sample30,sample76,sample28,sample74,sample70,sample59,sample56,sample64,sample44,sample35,sample40,sample9,sample63,sample73,sample77,sample66,sample61,sample6,sample37,sample36
chr15	99342565	99345768	2.62524	1.30045	2.01872	2.39922e-12	8.40359e-11	34	sample10,sample27,sample5,sample33,sample1,sample55,sample2,sample65,sample51,sample47,sample69,sample46,sample31,sample75,sample62,sample49,sample17,sample34,sample74,sample72,sample64,sample44,sample29,sample35,sample18,sample40,sample9,sample53,sample77,sample66,sample61,sample6,sample37,sample36
chr17	62786503	62793605	3.86962	2.21821	1.74448	2.41409e-12	8.42503e-11	30	sample5,sample42,sample33,sample1,sample55,sample51,sample69,sample54,sample32,sample31,sample75,sample62,sample17,sample34,sample28,sample26,sample70,sample59,sample64,sample18,sample50,sample9,sample63,sample73,sample53,sample77,sample66,sample6,sample37,sample36
chr3	114463884	114465864	2.80608	1.26714	2.21449	2.42014e-12	8.43084e-11	21	sample1,sample2,sample65,sample47,sample69,sample46,sample31,sample48,sample62,sample49,sample17,sample30,sample76,sample64,sample44,sample40,sample50,sample63,sample73,sample53,sample77
chr11	19463125	19464584	2.39663	0.626968	3.82257	2.42183e-12	8.42912e-11	22	sample10,sample1,sample2,sample65,sample47,sample69,sample46,sample48,sample49,sample17,sample30,sample58,sample28,sample70,sample64,sample29,sample35,sample50,sample9,sample77,sample66,sample36
chr14	62025081	62033451	3.9165	2.31026	1.69527	2.42225e-12	8.42296e-11	33	sample45,sample67,sample33,sample1,sample55,sample4,sample2,sample51,sample47,sample69,sample32,sample46,sample48,sample75,sample39,sample7,sample62,sample17,sample34,sample30,sample58,sample28,sample26,sample59,sample56,sample64,sample18,sample9,sample77,sample66,sample61,sample37,sample36
chr7	98821635	98824020	2.54687	0.912036	2.79251	2.49013e-12	8.65118e-11	31	sample10,sample5,sample33,sample1,sample2,sample51,sample47,sample69,sample54,sample46,sample31,sample48,sample62,sample17,sample58,sample28,sample59,sample64,sample44,sample29,sample35,sample18,sample40,sample9,sample63,sample73,sample53,sample77,sample66,sample6,sample36
chr22	30600220	30610095	2.50325	0.961787	2.60271	2.49193e-12	8.64963e-11	35	sample80,sample10,sample5,sample33,sample1,sample55,sample2,sample51,sample47,sample69,sample46,sample31,sample48,sample75,sample39,sample7,sample49,sample17,sample34,sample30,sample76,sample58,sample70,sample72,sample44,sample29,sample35,sample18,sample50,sample9,sample77,sample66,sample60,sample61,sample36
chr2	113833783	113838164	2.80979	0.584457	4.80753	2.49961e-12	8.66846e-11	37	sample43,sample10,sample42,sample33,sample1,sample2,sample65,sample51,sample47,sample69,sample54,sample46,sample31,sample3,sample48,sample75,sample49,sample17,sample58,sample28,sample26,sample70,sample59,sample56,sample64,sample44,sample29,sample35,sample18,sample50,sample9,sample73,sample53,sample77,sample66,sample6,sample36
chr10	23387220	23390082	3.36151	1.51979	2.21183	2.51073e-12	8.6992e-11	25	sample10,sample51,sample47,sample69,sample32,sample31,sample48,sample75,sample62,sample17,sample30,sample76,sample58,sample59,sample64,sample35,sample40,sample50,sample9,sample73,sample53,sample77,sample66,sample6,sample37
chr7	75451018	75455276	2.57165	0.820935	3.13259	2.52034e-12	8.71681e-11	32	sample10,sample1,sample4,sample65,sample51,sample47,sample69,sample31,sample3,sample75,sample62,sample49,sample17,sample34,sample76,sample58,sample28,sample70,sample59,sample56,sample72,sample29,sample18,sample9,sample63,sample73,sample53,sample77,sample66,sample61,sample6,sample36
chr20	46437931	46439694	2.58132	0.52691	4.89896	2.52137e-12	8.71253e-11	21	sample33,sample1,sample51,sample69,sample31,sample75,sample34,sample30,sample58,sample72,sample64,sample44,sample29,sample35,sample18,sample40,sample50,sample9,sample63,sample53,sample77
chr22	29399249	29402603	3.1746	1.39597	2.27412	2.52235e-12	8.70812e-11	38	sample5,sample42,sample1,sample55,sample2,sample65,sample51,sample47,sample69,sample31,sample48,sample75,sample62,sample49,sample17,sample68,sample30,sample76,sample28,sample74,sample70,sample59,sample72,sample64,sample44,sample35,sample18,sample40,sample9,sample63,sample73,sample53,sample77,sample66,sample60,sample61,sample37,sample36
chr2	9937178	9943734	3.88901	1.94523	1.99926	2.52685e-12	8.71581e-11	39	sample10,sample5,sample45,sample33,sample1,sample55,sample51,sample47,sample69,sample54,sample31,sample3,sample48,sample75,sample39,sample7,sample62,sample49,sample17,sample68,sample30,sample58,sample28,sample26,sample74,sample59,sample72,sample64,sample35,sample40,sample50,sample9,sample73,sample53,sample77,sample66,sample61,sample6,sample36
chr9	20356336	20358773	2.16295	1.07977	2.00316	2.54071e-12	8.75577e-11	22	sample45,sample65,sample51,sample69,sample32,sample31,sample48,sample49,sample17,sample76,sample64,sample44,sample35,sample40,sample50,sample9,sample73,sample53,sample77,sample66,sample6,sample36
chr21	36574656	36580729	2.22353	1.22184	1.81983	2.54215e-12	8.75291e-11	23	sample80,sample10,sample45,sample33,sample2,sample46,sample31,sample48,sample75,sample39,sample7,sample49,sample34,sample76,sample16,sample18,sample40,sample50,sample9,sample53,sample77,sample60,sample36
chrX	24443814	24447460	3.53621	1.42746	2.47727	2.55082e-12	8.76709e-11	39	sample80,sample5,sample42,sample1,sample55,sample65,sample23,sample51,sample47,sample69,sample31,sample48,sample75,sample62,sample49,sample17,sample68,sample30,sample76,sample58,sample26,sample74,sample56,sample72,sample64,sample44,sample35,sample18,sample40,sample50,sample63,sample73,sample53,sample77,sample66,sample60,sample6,sample37,sample36
chr9	14249954	14252298	2.49749	0.897401	2.78302	2.55471e-12	8.77262e-11	30	sample33,sample1,sample65,sample51,sample47,sample69,sample32,sample31,sample48,sample75,sample62,sample17,sample30,sample76,sample58,sample74,sample72,sample64,sample44,sample35,sample40,sample50,sample9,sample73,sample53,sample77,sample66,sample6,sample37,sample36
chr14	24822711	24824248	2.17532	0.954504	2.279	2.55474e-12	8.76488e-11	20	sample10,sample1,sample51,sample47,sample69,sample31,sample3,sample48,sample62,sample17,sample76,sample58,sample64,sample29,sample35,sample50,sample9,sample63,sample77,sample36
chr11	58426177	58428274	1.726	0.412541	4.18383	2.58502e-12	8.85301e-11	16	sample33,sample2,sample51,sample47,sample31,sample48,sample17,sample58,sample29,sample35,sample18,sample50,sample9,sample63,sample77,sample36
chr3	149118096	149121154	1.7866	0.439045	4.0693	2.61785e-12	8.9495e-11	23	sample10,sample33,sample65,sample51,sample47,sample69,sample54,sample31,sample48,sample49,sample30,sample58,sample59,sample64,sample29,sample35,sample40,sample9,sample63,sample73,sample77,sample6,sample36
chr4	904480	907452	3.4734	1.61958	2.14463	2.66459e-12	9.07706e-11	30	sample1,sample55,sample52,sample2,sample51,sample47,sample69,sample54,sample31,sample3,sample62,sample17,sample34,sample58,sample28,sample74,sample70,sample59,sample72,sample64,sample44,sample18,sample9,sample63,sample73,sample53,sample77,sample61,sample6,sample36
chr2	208656362	208657728	3.21023	1.70488	1.88297	2.6675e-12	9.07893e-11	27	sample10,sample5,sample33,sample1,sample2,sample51,sample47,sample69,sample48,sample75,sample62,sample49,sample76,sample58,sample28,sample74,sample59,sample64,sample29,sample35,sample9,sample73,sample53,sample77,sample66,sample37,sample36
chr3	127608516	127610603	2.1541	0.726541	2.96486	2.69864e-12	9.1687e-11	23	sample10,sample33,sample1,sample2,sample65,sample51,sample47,sample31,sample48,sample17,sample34,sample76,sample58,sample56,sample64,sample44,sample29,sample35,sample18,sample63,sample77,sample6,sample36
chr19	36094860	36096861	3.21731	0.609108	5.282	2.70622e-12	9.18636e-11	30	sample43,sample1,sample55,sample65,sample47,sample69,sample54,sample46,sample31,sample3,sample75,sample62,sample17,sample30,sample76,sample58,sample28,sample72,sample64,sample44,sample29,sample35,sample18,sample40,sample50,sample9,sample53,sample77,sample66,sample6
chr8	126230669	126233859	4.3276	2.00022	2.16356	2.71377e-12	9.20385e-11	41	sample10,sample27,sample42,sample45,sample33,sample1,sample55,sample4,sample2,sample23,sample51,sample47,sample69,sample54,sample32,sample46,sample31,sample48,sample7,sample62,sample49,sample17,sample68,sample34,sample30,sample76,sample59,sample56,sample64,sample44,sample29,sample35,sample18,sample9,sample63,sample53,sample77,sample66,sample6,sample37,sample36
chr6	43118001	43119763	2.78942	0.956005	2.91779	2.71689e-12	9.20635e-11	26	sample10,sample1,sample51,sample47,sample69,sample46,sample31,sample48,sample75,sample17,sample30,sample58,sample59,sample56,sample72,sample64,sample44,sample29,sample18,sample40,sample9,sample73,sample53,sample77,sample66,sample6
chr6	138018125	138019762	2.58157	1.33018	1.94076	2.73475e-12	9.25055e-11	22	sample5,sample33,sample1,sample2,sample47,sample69,sample31,sample75,sample17,sample76,sample58,sample72,sample64,sample35,sample40,sample50,sample73,sample77,sample61,sample6,sample37,sample36
chr1	183107870	183109680	2.36391	1.06016	2.22976	2.74317e-12	9.27091e-11	21	sample33,sample65,sample51,sample47,sample69,sample54,sample46,sample31,sample48,sample49,sample17,sample58,sample64,sample35,sample40,sample50,sample63,sample73,sample77,sample6,sample36
chr5	39398444	39402811	2.38337	1.25204	1.90359	2.77554e-12	9.36385e-11	26	sample5,sample45,sample55,sample2,sample31,sample48,sample75,sample7,sample62,sample49,sample34,sample30,sample76,sample56,sample16,sample64,sample44,sample35,sample18,sample50,sample63,sample77,sample60,sample6,sample37,sample36
chr11	16812233	16813821	2.52427	1.41268	1.78687	2.77945e-12	9.36885e-11	16	sample80,sample1,sample2,sample51,sample31,sample48,sample75,sample7,sample34,sample76,sample64,sample35,sample18,sample77,sample60,sample36
chr1	59220713	59221938	2.60285	1.25234	2.07838	2.79898e-12	9.42643e-11	16	sample33,sample1,sample2,sample47,sample31,sample48,sample75,sample49,sample17,sample30,sample16,sample18,sample77,sample60,sample6,sample36
chr3	129512505	129514266	2.4212	1.01485	2.38577	2.82446e-12	9.4956e-11	25	sample10,sample33,sample1,sample2,sample51,sample47,sample69,sample54,sample31,sample48,sample75,sample7,sample49,sample76,sample70,sample72,sample64,sample18,sample9,sample63,sample73,sample77,sample66,sample6,sample36
chr3	170715717	170720707	1.66791	0.648971	2.57009	2.8718e-12	9.62952e-11	20	sample10,sample33,sample2,sample51,sample47,sample69,sample31,sample62,sample49,sample17,sample30,sample58,sample64,sample35,sample9,sample63,sample77,sample61,sample6,sample36
chr3	171591555	171594952	1.86204	0.779427	2.38899	2.89115e-12	9.67757e-11	14	sample1,sample2,sample65,sample7,sample62,sample49,sample17,sample64,sample35,sample50,sample77,sample60,sample6,sample36
chr15	85401094	85403630	1.78791	0.643606	2.77796	2.90288e-12	9.70836e-11	14	sample1,sample47,sample48,sample7,sample49,sample76,sample74,sample64,sample35,sample9,sample63,sample77,sample6,sample36
chr9	12783734	12785907	3.25529	1.70098	1.91377	2.90847e-12	9.7102e-11	26	sample10,sample33,sample1,sample55,sample51,sample47,sample69,sample48,sample75,sample49,sample34,sample76,sample58,sample28,sample26,sample16,sample64,sample35,sample18,sample50,sample63,sample73,sample77,sample66,sample6,sample36
chr17	70254853	70257444	1.99742	0.560272	3.56509	2.92182e-12	9.7379e-11	23	sample10,sample65,sample51,sample47,sample69,sample54,sample31,sample48,sample49,sample17,sample68,sample59,sample72,sample64,sample44,sample29,sample35,sample40,sample9,sample63,sample73,sample66,sample36
chr6	88516878	88520062	1.67921	0.51617	3.25321	2.93164e-12	9.74529e-11	15	sample1,sample2,sample65,sample69,sample46,sample31,sample62,sample17,sample68,sample30,sample64,sample35,sample63,sample53,sample6
chr14	101926557	101929700	2.23815	0.550519	4.06552	2.93775e-12	9.75719e-11	24	sample43,sample42,sample1,sample55,sample2,sample65,sample69,sample32,sample31,sample75,sample17,sample68,sample76,sample58,sample72,sample64,sample35,sample18,sample40,sample50,sample63,sample73,sample6,sample36
chrX	132807901	132812714	3.59514	1.29525	2.77563	2.93955e-12	9.75476e-11	38	sample5,sample33,sample1,sample55,sample2,sample65,sample51,sample47,sample69,sample54,sample32,sample46,sample31,sample48,sample62,sample17,sample79,sample58,sample28,sample74,sample59,sample56,sample64,sample44,sample29,sample35,sample40,sample50,sample9,sample63,sample73,sample53,sample77,sample38,sample66,sample61,sample37,sample36
chr4	124426216	124427746	3.38196	1.82879	1.84929	2.93993e-12	9.74759e-11	21	sample33,sample65,sample51,sample48,sample75,sample62,sample49,sample58,sample26,sample74,sample59,sample72,sample64,sample18,sample40,sample9,sample63,sample77,sample61,sample6,sample36
chrX	132677772	132679088	2.02947	0.467589	4.3403	2.97332e-12	9.84984e-11	14	sample1,sample47,sample46,sample48,sample62,sample17,sample76,sample58,sample56,sample44,sample35,sample50,sample77,sample36
chr11	34672947	34678107	2.55368	1.24919	2.04427	3.08648e-12	1.01896e-10	28	sample5,sample33,sample1,sample65,sample51,sample47,sample69,sample54,sample31,sample48,sample17,sample34,sample30,sample58,sample70,sample59,sample64,sample29,sample35,sample18,sample40,sample50,sample9,sample73,sample77,sample66,sample6,sample36
chr15	81140725	81153702	2.60733	1.03013	2.53108	3.14293e-12	1.03405e-10	37	sample10,sample5,sample1,sample65,sample51,sample47,sample69,sample54,sample32,sample31,sample48,sample75,sample62,sample49,sample17,sample68,sample34,sample30,sample58,sample28,sample74,sample70,sample59,sample56,sample72,sample64,sample35,sample9,sample63,sample73,sample53,sample77,sample66,sample61,sample6,sample37,sample36
chr2	69978127	69984827	2.40008	1.52652	1.57225	3.22355e-12	1.05786e-10	24	sample10,sample33,sample1,sample51,sample47,sample69,sample32,sample31,sample48,sample62,sample17,sample34,sample30,sample28,sample59,sample64,sample29,sample35,sample9,sample73,sample77,sample66,sample6,sample36
chrX	151149010	151156180	3.07262	0.911035	3.37267	3.24088e-12	1.06264e-10	44	sample10,sample27,sample5,sample33,sample1,sample55,sample65,sample51,sample47,sample69,sample54,sample32,sample31,sample48,sample75,sample62,sample49,sample17,sample68,sample30,sample76,sample58,sample28,sample74,sample59,sample56,sample72,sample64,sample44,sample35,sample18,sample40,sample50,sample9,sample63,sample73,sample53,sample77,sample38,sample66,sample61,sample6,sample37,sample36
chr7	130689037	130695276	2.99442	1.79405	1.66909	3.25117e-12	1.06511e-10	26	sample45,sample67,sample55,sample51,sample47,sample31,sample48,sample62,sample49,sample17,sample76,sample28,sample59,sample64,sample44,sample35,sample40,sample50,sample9,sample63,sample73,sample77,sample66,sample6,sample37,sample36
chr17	16767218	16769555	3.52896	1.61192	2.1893	3.29104e-12	1.07726e-10	25	sample5,sample33,sample1,sample55,sample2,sample51,sample69,sample48,sample75,sample49,sample17,sample34,sample58,sample26,sample74,sample72,sample64,sample18,sample9,sample63,sample77,sample66,sample6,sample37,sample36
chr17	64946564	64950294	3.37206	0.984862	3.4239	3.29518e-12	1.07769e-10	38	sample80,sample5,sample33,sample1,sample55,sample4,sample2,sample65,sample51,sample47,sample69,sample46,sample31,sample48,sample75,sample62,sample49,sample17,sample30,sample76,sample26,sample74,sample72,sample64,sample44,sample35,sample18,sample40,sample50,sample9,sample63,sample73,sample77,sample38,sample60,sample61,sample6,sample36
chr2	174896336	174897990	2.39059	1.03825	2.30252	3.29702e-12	1.07738e-10	21	sample43,sample10,sample5,sample1,sample2,sample31,sample48,sample75,sample49,sample34,sample76,sample72,sample64,sample44,sample18,sample63,sample77,sample78,sample66,sample61,sample36
chr5	14011192	14012255	3.14969	1.25194	2.51584	3.39663e-12	1.10524e-10	22	sample33,sample1,sample51,sample47,sample69,sample31,sample48,sample75,sample62,sample68,sample30,sample76,sample59,sample72,sample64,sample18,sample9,sample63,sample73,sample77,sample60,sample36
chr2	26230864	26237142	3.08966	1.32377	2.33399	3.51402e-12	1.13863e-10	40	sample10,sample5,sample42,sample33,sample1,sample55,sample65,sample51,sample47,sample69,sample54,sample46,sample31,sample3,sample48,sample75,sample49,sample17,sample68,sample34,sample30,sample58,sample28,sample74,sample70,sample59,sample56,sample72,sample64,sample44,sample29,sample18,sample50,sample9,sample63,sample53,sample77,sample66,sample6,sample36
chr8	22929302	22933249	3.05836	1.64111	1.86359	3.52854e-12	1.14141e-10	30	sample10,sample33,sample1,sample55,sample2,sample51,sample47,sample69,sample54,sample31,sample3,sample48,sample75,sample34,sample76,sample58,sample28,sample26,sample59,sample64,sample29,sample18,sample50,sample9,sample73,sample53,sample77,sample6,sample37,sample36
chr6	139137663	139140195	3.16046	1.62847	1.94075	3.53009e-12	1.14095e-10	33	sample5,sample33,sample1,sample4,sample2,sample65,sample51,sample47,sample69,sample54,sample31,sample48,sample75,sample62,sample49,sample17,sample76,sample28,sample74,sample59,sample72,sample64,sample44,sample35,sample40,sample50,sample9,sample73,sample77,sample38,sample66,sample37,sample36
chr14	76001315	76003452	2.16637	1.05075	2.06173	3.54225e-12	1.14392e-10	24	sample5,sample45,sample33,sample1,sample2,sample65,sample47,sample54,sample31,sample48,sample75,sample49,sample17,sample58,sample59,sample72,sample35,sample18,sample40,sample9,sample63,sample53,sample77,sample36
chr18	3620180	3627214	3.77398	2.24325	1.68237	3.55562e-12	1.14631e-10	22	sample43,sample27,sample1,sample2,sample51,sample47,sample69,sample75,sample17,sample34,sample76,sample28,sample26,sample70,sample59,sample72,sample35,sample18,sample9,sample63,sample77,sample36
chr17	70679443	70681094	3.05427	1.17471	2.60001	3.56099e-12	1.14709e-10	32	sample10,sample5,sample33,sample55,sample2,sample65,sample51,sample47,sample54,sample46,sample31,sample75,sample62,sample49,sample17,sample34,sample30,sample76,sample58,sample64,sample44,sample29,sample35,sample18,sample40,sample50,sample9,sample63,sample73,sample77,sample66,sample6
chr12	112272244	112273906	4.70048	2.54932	1.84381	3.64241e-12	1.16843e-10	32	sample27,sample5,sample33,sample1,sample4,sample51,sample47,sample69,sample32,sample31,sample75,sample62,sample49,sample68,sample30,sample58,sample28,sample26,sample74,sample70,sample59,sample56,sample64,sample18,sample50,sample9,sample63,sample73,sample53,sample6,sample37,sample36
chr5	173945757	173950589	1.52821	0.185488	8.23887	3.70323e-12	1.18596e-10	19	sample1,sample65,sample51,sample47,sample69,sample31,sample62,sample17,sample76,sample58,sample70,sample59,sample64,sample35,sample50,sample9,sample77,sample61,sample36
chr7	33736558	33742169	4.03886	1.09405	3.69165	3.73213e-12	1.19323e-10	46	sample43,sample10,sample27,sample5,sample42,sample1,sample55,sample2,sample65,sample51,sample47,sample69,sample54,sample32,sample46,sample31,sample3,sample48,sample75,sample62,sample49,sample17,sample68,sample30,sample76,sample58,sample28,sample74,sample59,sample56,sample72,sample64,sample44,sample35,sample18,sample40,sample50,sample9,sample63,sample73,sample53,sample77,sample66,sample6,sample37,…
chr22	33040132	33041457	3.71305	1.65101	2.24895	3.78929e-12	1.20549e-10	32	sample5,sample42,sample1,sample55,sample65,sample23,sample47,sample69,sample46,sample31,sample75,sample39,sample7,sample62,sample49,sample17,sample30,sample76,sample28,sample56,sample72,sample64,sample44,sample35,sample40,sample50,sample63,sample73,sample77,sample66,sample37,sample36
chr4	15666303	15668458	2.1329	1.09643	1.94531	3.79137e-12	1.20516e-10	25	sample10,sample33,sample1,sample2,sample51,sample47,sample69,sample32,sample46,sample31,sample48,sample75,sample68,sample34,sample76,sample58,sample72,sample44,sample29,sample35,sample18,sample9,sample77,sample6,sample36
chr12	110780121	110784177	2.50228	1.10139	2.27193	3.83377e-12	1.21563e-10	33	sample10,sample1,sample55,sample4,sample2,sample65,sample51,sample47,sample69,sample54,sample46,sample31,sample48,sample75,sample62,sample17,sample34,sample30,sample58,sample28,sample74,sample70,sample64,sample44,sample29,sample35,sample18,sample50,sample9,sample73,sample53,sample77,sample66
chr1	147188041	147191801	3.73042	1.60102	2.33003	3.85705e-12	1.222e-10	40	sample42,sample45,sample67,sample33,sample1,sample4,sample65,sample51,sample47,sample69,sample54,sample32,sample46,sample31,sample3,sample48,sample75,sample62,sample17,sample68,sample34,sample30,sample58,sample28,sample70,sample59,sample56,sample72,sample64,sample44,sample29,sample18,sample40,sample9,sample73,sample53,sample77,sample66,sample37,sample36
chr6	131404194	131406560	1.69495	0.620632	2.731	3.89714e-12	1.23268e-10	15	sample33,sample51,sample47,sample69,sample31,sample48,sample49,sample30,sample58,sample59,sample64,sample40,sample9,sample63,sample37
chr10	61730670	61732739	2.41566	1.10177	2.19253	3.91165e-12	1.23625e-10	23	sample33,sample1,sample2,sample65,sample47,sample54,sample31,sample48,sample62,sample49,sample17,sample76,sample74,sample72,sample35,sample40,sample63,sample73,sample53,sample77,sample66,sample61,sample36
chr3	150064393	150066942	1.8101	0.723599	2.50153	3.94484e-12	1.24469e-10	18	sample33,sample47,sample69,sample54,sample48,sample75,sample7,sample49,sample59,sample35,sample18,sample9,sample63,sample73,sample77,sample66,sample6,sample36
chr3	58157823	58168151	4.07172	2.1019	1.93716	3.95505e-12	1.24689e-10	35	sample10,sample33,sample1,sample55,sample51,sample47,sample69,sample46,sample31,sample3,sample48,sample75,sample62,sample68,sample30,sample76,sample58,sample28,sample26,sample74,sample70,sample59,sample72,sample64,sample29,sample18,sample40,sample9,sample63,sample73,sample53,sample77,sample66,sample6,sample36
chr12	13023027	13058616	4.69008	2.58329	1.81554	3.96676e-12	1.24956e-10	49	sample10,sample5,sample42,sample45,sample33,sample1,sample55,sample4,sample2,sample51,sample47,sample69,sample54,sample32,sample31,sample48,sample75,sample39,sample7,sample62,sample49,sample17,sample68,sample34,sample79,sample30,sample76,sample58,sample28,sample26,sample57,sample70,sample59,sample56,sample72,sample64,sample44,sample35,sample18,sample40,sample9,sample63,sample73,sample53,sample77,…
chr10	124103642	124105135	2.60092	0.966778	2.69029	3.99495e-12	1.25536e-10	24	sample10,sample5,sample33,sample1,sample51,sample47,sample31,sample48,sample62,sample17,sample30,sample76,sample58,sample56,sample72,sample64,sample44,sample40,sample50,sample9,sample63,sample77,sample66,sample36
chr13	91518290	91520006	2.7009	0.406964	6.63671	4.00682e-12	1.25806e-10	35	sample10,sample5,sample33,sample1,sample4,sample65,sample51,sample47,sample69,sample54,sample3,sample48,sample75,sample49,sample17,sample58,sample74,sample70,sample59,sample56,sample72,sample64,sample44,sample29,sample35,sample18,sample40,sample50,sample9,sample63,sample53,sample77,sample66,sample6,sample37
chr17	77816916	77820062	5.35697	2.23926	2.39229	4.02639e-12	1.26318e-10	41	sample43,sample10,sample8,sample5,sample33,sample1,sample55,sample2,sample65,sample51,sample47,sample69,sample32,sample3,sample48,sample75,sample39,sample7,sample62,sample17,sample34,sample76,sample58,sample26,sample74,sample56,sample72,sample64,sample35,sample50,sample9,sample63,sample73,sample53,sample77,sample38,sample66,sample60,sample61,sample6,sample36
chr8	129563675	129570160	3.21015	0.891343	3.60147	4.05485e-12	1.26797e-10	38	sample5,sample45,sample33,sample1,sample55,sample4,sample2,sample65,sample51,sample47,sample69,sample54,sample32,sample31,sample48,sample62,sample49,sample17,sample68,sample30,sample76,sample58,sample59,sample56,sample72,sample64,sample44,sample35,sample40,sample50,sample9,sample63,sample73,sample53,sample77,sample66,sample61,sample36
chr15	79279762	79287185	2.88031	1.18766	2.42519	4.07001e-12	1.27168e-10	46	sample80,sample43,sample10,sample5,sample42,sample33,sample1,sample55,sample2,sample65,sample51,sample47,sample69,sample46,sample31,sample48,sample75,sample39,sample7,sample62,sample49,sample17,sample68,sample34,sample30,sample76,sample74,sample56,sample72,sample16,sample64,sample44,sample35,sample18,sample40,sample50,sample63,sample73,sample53,sample77,sample66,sample60,sample61,sample6,sample37…
chr10	124023362	124025669	2.72745	1.18902	2.29386	4.09238e-12	1.27763e-10	24	sample10,sample33,sample1,sample65,sample51,sample47,sample69,sample54,sample31,sample48,sample49,sample17,sample58,sample59,sample56,sample29,sample35,sample40,sample9,sample63,sample77,sample6,sample37,sample36
chr10	33422053	33426748	1.8282	0.49819	3.66969	4.10734e-12	1.28023e-10	29	sample10,sample27,sample5,sample45,sample33,sample1,sample2,sample47,sample46,sample31,sample48,sample75,sample49,sample17,sample68,sample76,sample58,sample56,sample64,sample44,sample29,sample35,sample18,sample50,sample63,sample77,sample61,sample6,sample36
chr1	205408092	205420556	4.75295	1.86828	2.54402	4.14897e-12	1.29216e-10	32	sample5,sample45,sample33,sample55,sample2,sample65,sample23,sample51,sample47,sample54,sample46,sample75,sample62,sample49,sample17,sample34,sample58,sample28,sample26,sample70,sample59,sample72,sample29,sample35,sample40,sample9,sample73,sample53,sample77,sample66,sample61,sample36
chr7	130577282	130632149	5.68983	3.53281	1.61057	4.18991e-12	1.3007e-10	43	sample10,sample5,sample45,sample67,sample1,sample55,sample4,sample2,sample51,sample47,sample69,sample32,sample46,sample31,sample3,sample48,sample75,sample7,sample62,sample17,sample34,sample30,sample76,sample58,sample28,sample26,sample74,sample59,sample72,sample64,sample44,sample29,sample35,sample40,sample50,sample9,sample63,sample73,sample77,sample66,sample6,sample37,sample36
chr2	134973507	134978867	2.43114	1.20439	2.01857	4.24619e-12	1.31605e-10	30	sample10,sample5,sample45,sample1,sample2,sample65,sample51,sample47,sample69,sample54,sample31,sample48,sample75,sample7,sample49,sample17,sample34,sample30,sample58,sample59,sample72,sample64,sample35,sample18,sample50,sample9,sample73,sample77,sample66,sample36
chr13	73994956	73997766	2.06799	0.514652	4.01823	4.25977e-12	1.31919e-10	14	sample33,sample1,sample47,sample54,sample31,sample48,sample34,sample58,sample64,sample35,sample18,sample50,sample9,sample77
chr16	14049956	14052646	2.76452	1.7578	1.57271	4.28973e-12	1.32633e-10	28	sample5,sample33,sample1,sample2,sample51,sample47,sample69,sample31,sample75,sample62,sample49,sample17,sample68,sample34,sample76,sample58,sample64,sample44,sample18,sample40,sample9,sample63,sample73,sample53,sample77,sample66,sample60,sample36
chr7	112124247	112125581	2.21531	0.861359	2.57188	4.33852e-12	1.3382e-10	14	sample10,sample1,sample47,sample46,sample17,sample58,sample64,sample44,sample29,sample35,sample40,sample50,sample77,sample36
chr1	47218226	47224301	2.74858	0.604241	4.54882	4.33936e-12	1.33738e-10	39	sample43,sample5,sample42,sample1,sample55,sample65,sample47,sample69,sample32,sample46,sample31,sample75,sample62,sample49,sample17,sample30,sample76,sample58,sample28,sample74,sample59,sample56,sample72,sample64,sample44,sample29,sample35,sample40,sample50,sample9,sample63,sample73,sample53,sample77,sample38,sample66,sample61,sample6,sample36
chr3	182961622	182963673	2.1203	0.892895	2.37463	4.3431e-12	1.3364e-10	18	sample10,sample33,sample1,sample51,sample47,sample69,sample31,sample62,sample17,sample58,sample72,sample64,sample18,sample9,sample73,sample77,sample66,sample36
chr5	7170708	7171633	2.39914	0.421335	5.69413	4.35285e-12	1.33833e-10	23	sample10,sample1,sample51,sample47,sample69,sample54,sample48,sample75,sample62,sample49,sample58,sample70,sample59,sample72,sample64,sample35,sample40,sample9,sample63,sample73,sample66,sample6,sample36
chrX	16621086	16623852	2.19397	0.756557	2.89994	4.37226e-12	1.34215e-10	22	sample33,sample1,sample65,sample51,sample47,sample69,sample32,sample31,sample49,sample30,sample58,sample64,sample44,sample29,sample35,sample40,sample50,sample9,sample63,sample77,sample6,sample36
chr1	229388034	229390041	2.42761	1.18573	2.04735	4.42165e-12	1.35407e-10	28	sample1,sample55,sample65,sample51,sample47,sample69,sample54,sample46,sample31,sample48,sample62,sample49,sample17,sample58,sample59,sample56,sample72,sample64,sample44,sample35,sample40,sample50,sample9,sample63,sample53,sample77,sample61,sample36
chr20	20527358	20532008	2.14877	0.50561	4.24987	4.48432e-12	1.36782e-10	27	sample43,sample5,sample33,sample65,sample47,sample69,sample46,sample31,sample48,sample49,sample76,sample58,sample74,sample56,sample64,sample44,sample35,sample40,sample50,sample9,sample63,sample53,sample77,sample61,sample6,sample37,sample36
chr2	174397277	174398390	2.97996	1.40788	2.11662	4.53423e-12	1.38195e-10	27	sample10,sample5,sample1,sample2,sample51,sample47,sample69,sample54,sample32,sample31,sample48,sample75,sample49,sample76,sample58,sample74,sample59,sample56,sample72,sample64,sample18,sample9,sample63,sample73,sample77,sample66,sample6
chr8	26122869	26124785	2.47743	1.08303	2.2875	4.54467e-12	1.38404e-10	19	sample10,sample33,sample1,sample2,sample51,sample47,sample69,sample54,sample31,sample48,sample75,sample39,sample34,sample30,sample58,sample9,sample77,sample66,sample36
chr2	112416233	112418428	3.621	1.20636	3.0016	4.55912e-12	1.38734e-10	36	sample43,sample10,sample5,sample33,sample1,sample55,sample2,sample51,sample47,sample69,sample54,sample32,sample46,sample31,sample48,sample75,sample49,sample30,sample76,sample58,sample70,sample56,sample72,sample64,sample44,sample29,sample35,sample18,sample40,sample50,sample9,sample77,sample38,sample66,sample61,sample36
chr16	30952897	30954911	3.44014	1.95636	1.75844	4.57297e-12	1.39046e-10	26	sample10,sample27,sample5,sample42,sample33,sample51,sample47,sample31,sample48,sample75,sample62,sample68,sample34,sample58,sample74,sample72,sample64,sample44,sample18,sample9,sample63,sample53,sample77,sample66,sample6,sample36
chr6	44457507	44458879	2.90294	0.990928	2.92952	4.60996e-12	1.4006e-10	20	sample80,sample10,sample2,sample47,sample69,sample46,sample31,sample48,sample75,sample39,sample7,sample34,sample76,sample44,sample35,sample18,sample50,sample77,sample60,sample36
chr16	2842912	2847826	3.83002	1.92408	1.99058	4.64202e-12	1.40923e-10	23	sample10,sample5,sample45,sample67,sample33,sample1,sample47,sample31,sample62,sample79,sample58,sample70,sample72,sample64,sample44,sample35,sample40,sample50,sample63,sample73,sample77,sample37,sample36
chr20	24880421	24882022	1.86789	0.329507	5.66873	4.69721e-12	1.42262e-10	16	sample42,sample33,sample1,sample51,sample47,sample54,sample32,sample48,sample75,sample49,sample17,sample35,sample50,sample9,sample77,sample36
chr8	22962355	22964367	2.47287	0.98909	2.50015	4.70183e-12	1.42289e-10	24	sample10,sample1,sample51,sample47,sample69,sample54,sample31,sample48,sample62,sample49,sample17,sample30,sample58,sample74,sample72,sample44,sample50,sample9,sample63,sample73,sample53,sample77,sample6,sample36
chr12	67985975	67988425	2.67912	1.08235	2.47529	4.78069e-12	1.44223e-10	32	sample10,sample33,sample1,sample2,sample51,sample47,sample69,sample31,sample48,sample62,sample49,sample17,sample30,sample76,sample58,sample74,sample59,sample56,sample72,sample64,sample44,sample35,sample40,sample50,sample9,sample63,sample73,sample53,sample77,sample6,sample37,sample36
chr11	67340370	67340984	2.25168	0.895713	2.51384	4.79066e-12	1.4441e-10	15	sample33,sample2,sample51,sample31,sample75,sample49,sample30,sample58,sample56,sample64,sample40,sample50,sample63,sample77,sample36
chr2	106018297	106024160	4.24866	2.39934	1.77076	4.79169e-12	1.44328e-10	25	sample10,sample5,sample45,sample33,sample51,sample47,sample69,sample54,sample32,sample7,sample62,sample17,sample76,sample28,sample59,sample56,sample64,sample35,sample50,sample9,sample73,sample77,sample66,sample6,sample36
chrX	30667058	30669250	2.20172	0.486947	4.52147	4.79364e-12	1.44274e-10	23	sample5,sample1,sample55,sample65,sample47,sample69,sample31,sample48,sample62,sample17,sample30,sample58,sample56,sample64,sample44,sample35,sample50,sample63,sample53,sample77,sample6,sample37,sample36
chr6	40962681	40968056	3.15875	1.53527	2.05746	4.86534e-12	1.46089e-10	33	sample27,sample5,sample33,sample2,sample51,sample47,sample69,sample32,sample31,sample48,sample75,sample62,sample49,sample30,sample76,sample28,sample26,sample74,sample72,sample64,sample44,sample35,sample40,sample9,sample63,sample73,sample53,sample77,sample66,sample61,sample6,sample37,sample36
chrX	106397957	106399745	1.48243	0.503641	2.94343	4.88211e-12	1.46479e-10	14	sample33,sample1,sample51,sample47,sample31,sample75,sample62,sample72,sample44,sample9,sample63,sample77,sample66,sample36
chr2	27904038	27906390	2.12802	1.19479	1.78109	4.91667e-12	1.47286e-10	15	sample10,sample5,sample1,sample2,sample46,sample75,sample76,sample56,sample64,sample35,sample18,sample77,sample66,sample60,sample36
chr12	116354738	116355111	3.21369	0.980419	3.27788	4.97491e-12	1.48799e-10	15	sample65,sample47,sample54,sample48,sample62,sample49,sample68,sample58,sample70,sample59,sample72,sample9,sample73,sample53,sample66
chr17	28135038	28135560	3.09537	1.21302	2.55178	4.9809e-12	1.48862e-10	15	sample51,sample47,sample69,sample31,sample75,sample62,sample56,sample64,sample35,sample40,sample50,sample9,sample73,sample77,sample36
chr8	95252391	95255740	4.65911	2.30819	2.01851	4.9829e-12	1.48807e-10	33	sample80,sample27,sample5,sample33,sample1,sample55,sample4,sample23,sample51,sample47,sample69,sample31,sample75,sample62,sample49,sample17,sample34,sample76,sample58,sample26,sample59,sample72,sample64,sample44,sample29,sample35,sample40,sample9,sample63,sample77,sample6,sample37,sample36
chr14	65709189	65711998	3.70096	1.33299	2.77643	5.11533e-12	1.52289e-10	37	sample10,sample5,sample33,sample1,sample2,sample51,sample47,sample69,sample54,sample46,sample31,sample3,sample48,sample75,sample62,sample49,sample17,sample68,sample34,sample30,sample76,sample58,sample28,sample70,sample59,sample64,sample29,sample35,sample18,sample40,sample9,sample63,sample53,sample66,sample6,sample37,sample36
chr9	114907712	114912947	1.61378	0.652666	2.4726	5.20761e-12	1.54439e-10	26	sample10,sample5,sample33,sample1,sample55,sample47,sample54,sample46,sample3,sample48,sample62,sample17,sample68,sample76,sample70,sample56,sample64,sample44,sample35,sample18,sample40,sample9,sample63,sample77,sample6,sample36
chr4	159010998	159011724	2.44549	0.654591	3.73591	5.2527e-12	1.55656e-10	17	sample51,sample47,sample69,sample54,sample48,sample49,sample17,sample30,sample58,sample74,sample59,sample64,sample18,sample40,sample9,sample73,sample77
chr4	91136290	91137662	1.84849	0.510144	3.62346	5.27194e-12	1.56106e-10	18	sample33,sample1,sample47,sample54,sample32,sample31,sample48,sample17,sample30,sample58,sample59,sample64,sample35,sample40,sample50,sample63,sample6,sample36
chr7	47596008	47598602	2.7328	1.24536	2.19438	5.32844e-12	1.57537e-10	24	sample27,sample5,sample1,sample55,sample2,sample47,sample69,sample48,sample75,sample39,sample49,sample76,sample58,sample26,sample74,sample56,sample72,sample64,sample18,sample40,sample9,sample77,sample66,sample36
chr1	32803398	32804978	4.62996	2.43856	1.89864	5.33946e-12	1.5762e-10	16	sample33,sample55,sample65,sample32,sample31,sample48,sample62,sample34,sample74,sample59,sample64,sample18,sample40,sample9,sample6,sample36
chr4	159926404	159928887	2.15017	0.816748	2.6326	5.41105e-12	1.59611e-10	27	sample33,sample55,sample2,sample65,sample51,sample47,sample69,sample48,sample75,sample62,sample49,sample17,sample68,sample58,sample70,sample59,sample56,sample64,sample35,sample18,sample40,sample50,sample9,sample63,sample77,sample6,sample36
chr3	58033576	58038826	2.83461	1.67743	1.68985	5.41532e-12	1.59615e-10	37	sample80,sample10,sample33,sample1,sample55,sample2,sample65,sample23,sample47,sample69,sample31,sample48,sample75,sample62,sample49,sample17,sample30,sample76,sample58,sample26,sample74,sample56,sample72,sample16,sample64,sample35,sample18,sample40,sample50,sample63,sample73,sample53,sample77,sample60,sample61,sample6,sample36
chrX	106169460	106179276	2.02245	0.318569	6.34854	5.42969e-12	1.59794e-10	29	sample10,sample5,sample33,sample1,sample55,sample2,sample65,sample51,sample47,sample69,sample46,sample31,sample48,sample75,sample62,sample49,sample17,sample58,sample74,sample72,sample64,sample18,sample50,sample9,sample73,sample53,sample77,sample66,sample36
chr8	142237600	142246329	4.05637	1.80398	2.24857	5.49571e-12	1.61367e-10	36	sample10,sample45,sample33,sample1,sample55,sample2,sample47,sample69,sample54,sample32,sample31,sample75,sample7,sample62,sample49,sample17,sample34,sample76,sample58,sample28,sample26,sample74,sample59,sample56,sample72,sample64,sample29,sample35,sample18,sample40,sample9,sample73,sample77,sample66,sample6,sample36
chr11	77896514	77897904	2.51835	1.10544	2.27814	5.74226e-12	1.67965e-10	26	sample10,sample5,sample33,sample1,sample55,sample2,sample51,sample47,sample54,sample32,sample31,sample48,sample75,sample17,sample58,sample56,sample72,sample64,sample44,sample29,sample35,sample18,sample9,sample63,sample66,sample6
chr11	91604316	91605664	2.36695	0.707181	3.34703	5.7439e-12	1.67886e-10	15	sample10,sample51,sample47,sample69,sample54,sample46,sample31,sample48,sample75,sample76,sample64,sample29,sample35,sample18,sample9
chr1	162318602	162320712	3.80591	1.91106	1.99152	5.78538e-12	1.68842e-10	32	sample5,sample42,sample33,sample1,sample55,sample2,sample51,sample47,sample69,sample32,sample31,sample48,sample75,sample62,sample30,sample76,sample58,sample28,sample59,sample64,sample44,sample29,sample35,sample40,sample9,sample63,sample53,sample77,sample61,sample6,sample37,sample36
chr21	36664150	36668468	1.96589	0.733138	2.68147	5.80583e-12	1.69182e-10	32	sample43,sample10,sample33,sample1,sample55,sample65,sample51,sample47,sample54,sample32,sample31,sample75,sample62,sample49,sample17,sample34,sample76,sample28,sample59,sample72,sample64,sample35,sample18,sample40,sample50,sample9,sample73,sample53,sample77,sample66,sample6,sample36
chr5	67728493	67731529	2.77717	1.62555	1.70845	5.81095e-12	1.69075e-10	27	sample10,sample5,sample45,sample2,sample47,sample69,sample46,sample75,sample39,sample7,sample62,sample17,sample34,sample30,sample76,sample28,sample26,sample72,sample64,sample44,sample35,sample18,sample9,sample53,sample77,sample66,sample36
chr6	158181185	158186690	4.08484	2.93573	1.39142	5.95236e-12	1.72668e-10	16	sample80,sample10,sample5,sample45,sample2,sample47,sample31,sample48,sample75,sample39,sample7,sample34,sample74,sample59,sample72,sample77
chr20	48753556	48770955	4.42599	2.86261	1.54614	5.99336e-12	1.73726e-10	30	sample80,sample10,sample5,sample33,sample1,sample51,sample47,sample69,sample54,sample31,sample48,sample75,sample39,sample17,sample34,sample30,sample76,sample58,sample74,sample70,sample56,sample72,sample18,sample9,sample53,sample77,sample38,sample66,sample60,sample37
chr11	64917226	64920913	3.42308	1.61644	2.11766	6.04607e-12	1.75122e-10	32	sample10,sample5,sample45,sample33,sample1,sample55,sample2,sample51,sample47,sample69,sample31,sample3,sample48,sample75,sample62,sample49,sample76,sample28,sample74,sample72,sample64,sample35,sample40,sample50,sample9,sample63,sample73,sample53,sample77,sample66,sample37,sample36
chr15	80886746	80891083	2.34817	0.571976	4.10536	6.06615e-12	1.7544e-10	35	sample10,sample42,sample33,sample1,sample51,sample47,sample69,sample54,sample46,sample31,sample48,sample62,sample49,sample17,sample34,sample30,sample58,sample28,sample70,sample59,sample56,sample72,sample64,sample44,sample29,sample35,sample18,sample40,sample50,sample9,sample63,sample53,sample77,sample6,sample36
chr4	143469040	143474110	2.38576	0.844137	2.82627	6.11254e-12	1.76649e-10	40	sample10,sample5,sample1,sample4,sample2,sample65,sample51,sample47,sample69,sample54,sample46,sample31,sample48,sample75,sample62,sample49,sample17,sample34,sample30,sample76,sample58,sample28,sample59,sample56,sample72,sample64,sample44,sample35,sample40,sample50,sample9,sample63,sample73,sample53,sample77,sample66,sample61,sample6,sample37,sample36
chr17	78002945	78005951	3.12384	1.45886	2.14129	6.13201e-12	1.77078e-10	37	sample10,sample5,sample1,sample55,sample4,sample65,sample51,sample47,sample69,sample54,sample31,sample48,sample75,sample62,sample49,sample17,sample68,sample34,sample30,sample76,sample58,sample74,sample72,sample64,sample44,sample35,sample40,sample50,sample9,sample63,sample73,sample53,sample77,sample66,sample61,sample6,sample36
chr6	2846313	2848065	2.77709	1.57287	1.76562	6.14066e-12	1.77063e-10	17	sample10,sample45,sample33,sample2,sample51,sample47,sample32,sample31,sample75,sample49,sample58,sample56,sample64,sample35,sample53,sample77,sample36
chr10	114766059	114767759	2.31189	1.24912	1.85082	6.15612e-12	1.77375e-10	14	sample1,sample48,sample75,sample62,sample17,sample70,sample56,sample72,sample64,sample40,sample63,sample73,sample6,sample36
chr3	188849346	188852331	2.96931	1.55668	1.90746	6.20348e-12	1.7834e-10	25	sample45,sample1,sample69,sample54,sample46,sample3,sample75,sample62,sample17,sample68,sample76,sample28,sample59,sample56,sample64,sample44,sample35,sample18,sample50,sample9,sample63,sample73,sample77,sample37,sample36
chr2	192241371	192242934	2.39313	1.23218	1.94218	6.20839e-12	1.78348e-10	14	sample33,sample47,sample31,sample48,sample49,sample17,sample30,sample59,sample64,sample44,sample35,sample9,sample77,sample36
chr8	54643283	54648217	2.64216	0.498284	5.30252	6.30147e-12	1.80752e-10	30	sample10,sample5,sample42,sample33,sample1,sample2,sample65,sample47,sample69,sample54,sample32,sample31,sample3,sample48,sample49,sample17,sample34,sample79,sample76,sample72,sample64,sample35,sample50,sample9,sample73,sample53,sample77,sample66,sample6,sample36
chr12	32221317	32223425	2.25107	0.768444	2.92938	6.33942e-12	1.8157e-10	23	sample5,sample33,sample1,sample2,sample65,sample47,sample69,sample31,sample48,sample17,sample30,sample76,sample58,sample28,sample64,sample29,sample35,sample9,sample63,sample77,sample61,sample6,sample36
chr6	11315382	11319787	3.62633	1.86177	1.94778	6.35902e-12	1.81996e-10	35	sample10,sample5,sample42,sample45,sample33,sample1,sample2,sample51,sample47,sample69,sample54,sample31,sample75,sample7,sample62,sample49,sample17,sample68,sample58,sample28,sample70,sample59,sample56,sample64,sample44,sample35,sample18,sample40,sample9,sample63,sample53,sample77,sample66,sample6,sample36
chr13	42219149	42225293	2.01062	0.543817	3.69723	6.37032e-12	1.82184e-10	42	sample10,sample5,sample33,sample1,sample55,sample4,sample65,sample51,sample47,sample69,sample54,sample32,sample46,sample31,sample48,sample75,sample62,sample49,sample17,sample30,sample76,sample58,sample28,sample74,sample59,sample56,sample72,sample64,sample44,sample35,sample40,sample50,sample9,sample63,sample53,sample77,sample66,sample60,sample61,sample6,sample37,sample36
chr12	12161590	12164648	2.71404	1.46568	1.85173	6.38701e-12	1.82525e-10	22	sample10,sample1,sample2,sample31,sample48,sample75,sample39,sample7,sample49,sample17,sample76,sample28,sample64,sample35,sample18,sample40,sample50,sample63,sample73,sample53,sample77,sample66
chr18	33037961	33039339	2.52849	1.42005	1.78056	6.53808e-12	1.86427e-10	15	sample33,sample51,sample47,sample54,sample46,sample31,sample48,sample75,sample49,sample76,sample26,sample18,sample50,sample63,sample36
chr8	61965675	61968686	3.11262	1.13401	2.7448	6.55327e-12	1.86722e-10	32	sample33,sample1,sample55,sample4,sample65,sample23,sample51,sample47,sample69,sample31,sample48,sample62,sample49,sample17,sample68,sample30,sample76,sample58,sample74,sample72,sample64,sample44,sample35,sample40,sample9,sample63,sample73,sample53,sample77,sample66,sample6,sample36
chr3	149108133	149109207	2.11418	0.880749	2.40044	6.57593e-12	1.87229e-10	14	sample10,sample33,sample1,sample51,sample47,sample48,sample49,sample64,sample44,sample40,sample9,sample63,sample77,sample66
chr17	70415073	70430510	4.57521	2.37956	1.92272	6.59196e-12	1.87547e-10	41	sample10,sample27,sample5,sample45,sample33,sample55,sample2,sample51,sample47,sample69,sample54,sample32,sample31,sample3,sample75,sample62,sample49,sample17,sample68,sample34,sample30,sample76,sample58,sample28,sample26,sample70,sample59,sample72,sample64,sample44,sample35,sample18,sample40,sample50,sample9,sample63,sample73,sample77,sample6,sample37,sample36
chr5	39447029	39450001	3.06337	1.1187	2.73834	6.653e-12	1.88725e-10	35	sample10,sample5,sample42,sample1,sample51,sample47,sample69,sample31,sample3,sample48,sample75,sample62,sample49,sample17,sample68,sample30,sample76,sample58,sample74,sample59,sample56,sample72,sample64,sample44,sample35,sample40,sample50,sample9,sample63,sample73,sample53,sample77,sample66,sample6,sample36
chr9	92136796	92144345	3.55951	1.88008	1.89327	6.73475e-12	1.90623e-10	44	sample43,sample10,sample5,sample45,sample1,sample2,sample65,sample51,sample47,sample69,sample54,sample46,sample31,sample3,sample48,sample75,sample62,sample49,sample17,sample30,sample76,sample58,sample28,sample74,sample59,sample56,sample72,sample64,sample44,sample29,sample35,sample18,sample40,sample50,sample9,sample63,sample73,sample53,sample77,sample78,sample66,sample61,sample37,sample36
chr16	85924076	85927980	2.70063	1.05677	2.55555	6.77441e-12	1.91605e-10	36	sample27,sample5,sample33,sample1,sample51,sample47,sample69,sample54,sample32,sample46,sample31,sample75,sample62,sample49,sample17,sample30,sample76,sample58,sample74,sample59,sample56,sample72,sample64,sample44,sample35,sample40,sample50,sample9,sample63,sample73,sample53,sample77,sample66,sample61,sample6,sample36
chr12	117074186	117079224	1.90019	0.605823	3.13655	6.80791e-12	1.9227e-10	24	sample5,sample65,sample51,sample47,sample69,sample54,sample46,sample31,sample62,sample49,sample17,sample30,sample76,sample58,sample59,sample64,sample35,sample40,sample9,sample63,sample53,sample6,sample37,sample36
chr3	190090432	190094928	1.98593	0.413227	4.80591	6.85115e-12	1.93066e-10	29	sample1,sample4,sample65,sample51,sample47,sample69,sample54,sample31,sample48,sample75,sample49,sample17,sample30,sample76,sample58,sample59,sample64,sample44,sample35,sample40,sample50,sample9,sample63,sample73,sample77,sample61,sample6,sample37,sample36
chr3	71544937	71546041	2.93278	1.25343	2.3398	6.95082e-12	1.95445e-10	24	sample10,sample5,sample1,sample2,sample47,sample69,sample46,sample48,sample75,sample39,sample7,sample62,sample49,sample17,sample34,sample16,sample44,sample35,sample50,sample73,sample77,sample60,sample61,sample36
chr10	63795537	63799697	3.35856	2.4155	1.39042	6.95802e-12	1.95505e-10	16	sample1,sample55,sample47,sample32,sample3,sample75,sample17,sample79,sample58,sample26,sample59,sample64,sample35,sample9,sample37,sample36
chr4	13703396	13708554	2.11532	0.641895	3.29544	6.95871e-12	1.95382e-10	30	sample5,sample33,sample1,sample2,sample65,sample51,sample47,sample69,sample54,sample32,sample31,sample75,sample62,sample17,sample30,sample76,sample58,sample59,sample56,sample64,sample44,sample29,sample35,sample40,sample50,sample9,sample77,sample6,sample37,sample36
chr14	53165534	53170432	2.59436	1.23646	2.09822	7.04624e-12	1.96977e-10	37	sample5,sample42,sample33,sample1,sample2,sample65,sample51,sample47,sample69,sample54,sample32,sample31,sample3,sample48,sample75,sample62,sample49,sample17,sample30,sample76,sample58,sample74,sample70,sample59,sample64,sample29,sample35,sample40,sample50,sample9,sample63,sample73,sample77,sample66,sample6,sample37,sample36
chr7	46254868	46256890	2.30266	0.339673	6.77906	7.05075e-12	1.96961e-10	21	sample1,sample65,sample47,sample54,sample31,sample48,sample75,sample17,sample30,sample58,sample74,sample56,sample64,sample44,sample35,sample50,sample73,sample77,sample66,sample61,sample36
chr14	54074828	54077375	2.10586	0.593861	3.54605	7.10191e-12	1.98102e-10	32	sample42,sample33,sample1,sample55,sample4,sample51,sample47,sample69,sample54,sample46,sample31,sample48,sample49,sample17,sample30,sample76,sample58,sample28,sample70,sample59,sample56,sample64,sample44,sample29,sample35,sample18,sample40,sample9,sample63,sample53,sample6,sample36
chr2	202011821	202018417	5.28135	3.45223	1.52984	7.12847e-12	1.98699e-10	22	sample5,sample45,sample67,sample33,sample55,sample47,sample32,sample48,sample75,sample62,sample34,sample76,sample59,sample64,sample35,sample50,sample9,sample73,sample77,sample6,sample37,sample36
chr11	64773855	64775574	2.18458	0.75857	2.87987	7.13909e-12	1.98851e-10	19	sample10,sample33,sample1,sample55,sample2,sample51,sample47,sample48,sample75,sample49,sample76,sample70,sample56,sample29,sample35,sample18,sample9,sample77,sample36
chr4	113003760	113005934	2.31264	0.816724	2.83161	7.20848e-12	2.00639e-10	27	sample42,sample33,sample1,sample2,sample47,sample69,sample54,sample46,sample31,sample48,sample49,sample17,sample68,sample30,sample58,sample59,sample56,sample64,sample35,sample40,sample50,sample9,sample63,sample77,sample6,sample37,sample36
chr8	101836081	101837672	2.30445	0.609224	3.7826	7.22617e-12	2.00986e-10	14	sample1,sample65,sample47,sample69,sample62,sample49,sample17,sample76,sample74,sample72,sample35,sample73,sample6,sample36
chr21	16247581	16252048	1.65172	0.773748	2.1347	7.23226e-12	2.0101e-10	19	sample1,sample65,sample51,sample47,sample54,sample48,sample49,sample17,sample76,sample64,sample44,sample35,sample40,sample50,sample9,sample63,sample73,sample6,sample36
chr7	155020355	155028568	2.05848	0.428226	4.80699	7.23908e-12	2.00909e-10	34	sample10,sample27,sample5,sample1,sample55,sample4,sample2,sample51,sample47,sample69,sample46,sample31,sample48,sample75,sample62,sample49,sample17,sample58,sample28,sample74,sample56,sample72,sample64,sample44,sample35,sample40,sample50,sample9,sample73,sample53,sample77,sample66,sample6,sample36
chr8	125282407	125284480	2.71737	0.897408	3.02802	7.29241e-12	2.02244e-10	26	sample10,sample5,sample33,sample1,sample55,sample2,sample47,sample48,sample75,sample39,sample49,sample17,sample30,sample76,sample56,sample44,sample29,sample35,sample18,sample40,sample50,sample77,sample60,sample61,sample37,sample36
chr9	140391583	140393839	2.62858	1.02666	2.56031	7.39802e-12	2.04436e-10	27	sample43,sample42,sample1,sample55,sample65,sample51,sample47,sample69,sample32,sample31,sample49,sample17,sample58,sample70,sample59,sample56,sample72,sample64,sample44,sample18,sample40,sample9,sample63,sample73,sample77,sample66,sample6
chr11	77009996	77011614	2.08881	0.766086	2.7266	7.48676e-12	2.06592e-10	15	sample10,sample33,sample2,sample47,sample31,sample48,sample17,sample58,sample56,sample64,sample35,sample9,sample63,sample77,sample36
chr2	165682113	165684110	2.04537	0.674136	3.03406	7.51688e-12	2.07126e-10	21	sample5,sample1,sample65,sample69,sample31,sample48,sample62,sample49,sample17,sample30,sample58,sample74,sample72,sample64,sample35,sample50,sample9,sample73,sample66,sample6,sample36
chr7	24860081	24862699	5.44757	2.96897	1.83483	7.52287e-12	2.07143e-10	25	sample42,sample45,sample67,sample55,sample4,sample2,sample51,sample47,sample31,sample48,sample75,sample49,sample17,sample26,sample59,sample56,sample64,sample44,sample35,sample50,sample9,sample73,sample53,sample77,sample36
chr2	96099009	96101759	2.47199	0.813304	3.03944	7.54783e-12	2.07533e-10	25	sample10,sample1,sample47,sample31,sample75,sample39,sample62,sample49,sample17,sample34,sample30,sample76,sample74,sample56,sample72,sample64,sample44,sample35,sample18,sample40,sample50,sample73,sample53,sample60,sample36
chr1	35147388	35156874	3.05417	1.09165	2.79777	7.56256e-12	2.0779e-10	37	sample5,sample1,sample55,sample4,sample65,sample51,sample47,sample69,sample54,sample32,sample31,sample75,sample62,sample49,sample17,sample30,sample76,sample58,sample28,sample70,sample56,sample72,sample64,sample44,sample35,sample40,sample50,sample9,sample63,sample73,sample53,sample77,sample66,sample61,sample6,sample37,sample36
chr8	126136662	126138924	4.5536	2.02637	2.24717	7.56707e-12	2.07765e-10	34	sample10,sample27,sample5,sample45,sample33,sample1,sample55,sample4,sample51,sample47,sample69,sample54,sample31,sample48,sample75,sample62,sample49,sample17,sample68,sample76,sample58,sample28,sample59,sample56,sample72,sample64,sample44,sample50,sample9,sample63,sample77,sample66,sample6,sample36
chr21	43645596	43650054	4.21789	2.41498	1.74655	7.62184e-12	2.0912e-10	36	sample80,sample43,sample10,sample42,sample45,sample1,sample55,sample65,sample51,sample47,sample69,sample3,sample48,sample75,sample39,sample7,sample62,sample17,sample34,sample58,sample28,sample70,sample59,sample56,sample72,sample64,sample35,sample18,sample40,sample9,sample73,sample53,sample77,sample6,sample37,sample36
chr3	172263662	172265307	2.33805	1.14026	2.05045	7.73762e-12	2.11994e-10	21	sample10,sample1,sample4,sample2,sample65,sample69,sample54,sample48,sample62,sample49,sample28,sample59,sample44,sample35,sample9,sample73,sample77,sample66,sample61,sample37,sample36
chr4	8100766	8105487	2.43154	1.01826	2.38795	7.84819e-12	2.14718e-10	31	sample10,sample5,sample1,sample55,sample2,sample65,sample47,sample69,sample32,sample46,sample31,sample48,sample75,sample62,sample49,sample17,sample30,sample76,sample58,sample74,sample56,sample72,sample64,sample44,sample35,sample18,sample40,sample50,sample63,sample6,sample36
chr8	94884898	94888401	2.85461	0.469979	6.0739	8.13983e-12	2.22223e-10	32	sample5,sample33,sample1,sample55,sample2,sample47,sample69,sample31,sample48,sample75,sample62,sample49,sample17,sample76,sample58,sample74,sample72,sample64,sample44,sample35,sample18,sample40,sample50,sample9,sample63,sample53,sample77,sample66,sample61,sample6,sample37,sample36
chr2	26678068	26681124	2.66084	0.817741	3.25389	8.19507e-12	2.23573e-10	31	sample43,sample10,sample5,sample42,sample33,sample1,sample55,sample51,sample47,sample46,sample48,sample75,sample7,sample62,sample17,sample68,sample76,sample58,sample56,sample72,sample64,sample44,sample35,sample50,sample63,sample73,sample77,sample66,sample61,sample6,sample36
chr15	79241098	79245248	2.94162	0.816282	3.60368	8.19775e-12	2.23487e-10	34	sample10,sample5,sample1,sample65,sample51,sample47,sample69,sample46,sample31,sample48,sample75,sample62,sample49,sample17,sample30,sample76,sample58,sample28,sample74,sample59,sample72,sample64,sample44,sample35,sample50,sample9,sample63,sample73,sample53,sample77,sample66,sample61,sample37,sample36
chr11	113533684	113536994	2.3082	0.473162	4.87825	8.23217e-12	2.24108e-10	27	sample5,sample1,sample65,sample51,sample47,sample69,sample32,sample31,sample48,sample75,sample62,sample49,sample76,sample59,sample64,sample44,sample35,sample40,sample50,sample9,sample63,sample73,sample77,sample66,sample61,sample6,sample36
chr13	45939254	45943532	3.97606	1.60397	2.47889	8.284e-12	2.25201e-10	39	sample10,sample5,sample42,sample45,sample33,sample1,sample55,sample2,sample65,sample51,sample47,sample69,sample31,sample3,sample75,sample7,sample62,sample17,sample58,sample28,sample74,sample70,sample59,sample56,sample72,sample64,sample29,sample35,sample18,sample40,sample50,sample9,sample63,sample53,sample77,sample66,sample6,sample37,sample36
chr19	55844384	55846183	4.24303	2.19029	1.9372	8.34849e-12	2.26794e-10	34	sample43,sample5,sample45,sample33,sample1,sample55,sample65,sample51,sample47,sample69,sample32,sample31,sample3,sample75,sample62,sample49,sample17,sample76,sample58,sample28,sample70,sample59,sample56,sample72,sample35,sample18,sample40,sample9,sample73,sample77,sample66,sample6,sample37,sample36
chr1	117900904	117901312	4.67715	1.26641	3.69323	8.35319e-12	2.26602e-10	26	sample10,sample1,sample51,sample47,sample54,sample32,sample46,sample31,sample48,sample75,sample17,sample76,sample58,sample74,sample56,sample72,sample44,sample35,sample18,sample50,sample9,sample63,sample73,sample77,sample6,sample36
chr20	9220168	9224400	3.81589	1.05568	3.61463	8.42116e-12	2.27964e-10	45	sample43,sample10,sample27,sample5,sample42,sample65,sample51,sample47,sample69,sample54,sample32,sample46,sample31,sample3,sample48,sample75,sample7,sample62,sample49,sample17,sample68,sample30,sample76,sample58,sample28,sample74,sample70,sample59,sample56,sample72,sample64,sample44,sample35,sample40,sample50,sample9,sample63,sample73,sample53,sample77,sample38,sample66,sample61,sample37,sample36
chr1	172349699	172353120	2.0619	0.977929	2.10844	8.43229e-12	2.28104e-10	22	sample45,sample1,sample65,sample51,sample69,sample54,sample31,sample62,sample49,sample17,sample76,sample59,sample72,sample64,sample44,sample35,sample40,sample50,sample9,sample66,sample61,sample36
chr1	200982165	200987496	2.41174	1.26514	1.9063	8.66036e-12	2.33127e-10	23	sample10,sample5,sample1,sample2,sample65,sample47,sample46,sample31,sample62,sample17,sample68,sample34,sample58,sample72,sample64,sample35,sample18,sample50,sample9,sample53,sample77,sample66,sample36
chr1	25492277	25497515	4.00519	2.17172	1.84425	8.80527e-12	2.36532e-10	29	sample5,sample45,sample33,sample1,sample55,sample65,sample51,sample47,sample32,sample31,sample3,sample48,sample75,sample62,sample49,sample76,sample74,sample59,sample72,sample64,sample35,sample40,sample9,sample73,sample77,sample66,sample6,sample37,sample36
chr1	20089690	20093425	2.1566	0.698446	3.08771	8.90601e-12	2.38572e-10	20	sample10,sample33,sample1,sample2,sample51,sample47,sample46,sample31,sample48,sample49,sample56,sample64,sample35,sample40,sample50,sample9,sample77,sample66,sample6,sample36
chr1	9170682	9176103	2.17702	0.814834	2.67174	9.06132e-12	2.42059e-10	29	sample43,sample5,sample1,sample55,sample65,sample31,sample48,sample75,sample62,sample49,sample17,sample30,sample76,sample58,sample74,sample56,sample72,sample64,sample44,sample35,sample40,sample50,sample9,sample63,sample53,sample66,sample61,sample6,sample36
chr13	108721496	108724114	2.6849	0.379098	7.08233	9.08571e-12	2.42542e-10	27	sample1,sample2,sample51,sample47,sample69,sample54,sample32,sample46,sample31,sample48,sample17,sample58,sample70,sample59,sample72,sample64,sample44,sample29,sample35,sample40,sample50,sample9,sample63,sample77,sample66,sample37,sample36
chr9	114820866	114825217	3.70826	2.22748	1.66478	9.12925e-12	2.43535e-10	32	sample80,sample27,sample5,sample42,sample45,sample67,sample1,sample55,sample4,sample23,sample47,sample31,sample48,sample75,sample39,sample7,sample49,sample17,sample68,sample34,sample76,sample58,sample26,sample74,sample56,sample72,sample64,sample35,sample18,sample50,sample53,sample6
chr21	36358926	36361187	2.35286	1.21066	1.94346	9.24843e-12	2.46544e-10	18	sample1,sample2,sample65,sample46,sample48,sample75,sample39,sample7,sample17,sample76,sample58,sample16,sample18,sample50,sample53,sample77,sample66,sample60
chr5	132705884	132709491	2.49198	0.490133	5.0843	9.33839e-12	2.48769e-10	30	sample10,sample1,sample65,sample47,sample69,sample54,sample46,sample3,sample48,sample75,sample62,sample17,sample30,sample76,sample28,sample74,sample56,sample72,sample64,sample44,sample35,sample18,sample50,sample9,sample63,sample73,sample77,sample66,sample6,sample36
chr4	75546984	75558800	2.27015	0.722353	3.14272	9.3702e-12	2.49444e-10	36	sample5,sample42,sample45,sample33,sample1,sample65,sample47,sample69,sample32,sample46,sample31,sample3,sample48,sample75,sample62,sample49,sample17,sample68,sample30,sample76,sample58,sample59,sample56,sample64,sample44,sample35,sample40,sample50,sample9,sample63,sample53,sample77,sample66,sample6,sample37,sample36
chr6	16723603	16727085	2.21491	1.19642	1.85129	9.45691e-12	2.50885e-10	21	sample10,sample33,sample2,sample51,sample47,sample69,sample31,sample48,sample75,sample39,sample62,sample49,sample17,sample34,sample64,sample29,sample35,sample18,sample9,sample77,sample36
chr10	12139313	12141120	1.77862	0.655451	2.71359	9.45693e-12	2.50713e-10	14	sample10,sample1,sample48,sample49,sample76,sample28,sample74,sample70,sample35,sample9,sample73,sample77,sample66,sample36
chr20	36753156	36757751	3.58681	1.5234	2.35449	9.51655e-12	2.5212e-10	45	sample80,sample27,sample5,sample33,sample1,sample55,sample4,sample2,sample65,sample23,sample51,sample47,sample69,sample31,sample3,sample48,sample75,sample39,sample7,sample62,sample49,sample17,sample34,sample76,sample58,sample28,sample74,sample56,sample72,sample64,sample44,sample35,sample18,sample40,sample50,sample63,sample73,sample53,sample77,sample66,sample60,sample61,sample6,sample37,sample36
chr8	102462981	102466013	1.76528	0.774264	2.27994	9.56188e-12	2.53147e-10	15	sample10,sample33,sample2,sample47,sample69,sample48,sample62,sample49,sample64,sample44,sample9,sample63,sample73,sample66,sample36
chr1	151870187	151871836	3.68939	1.49667	2.46507	9.57873e-12	2.53418e-10	28	sample10,sample42,sample1,sample65,sample51,sample47,sample69,sample54,sample46,sample48,sample75,sample17,sample68,sample74,sample56,sample72,sample64,sample29,sample35,sample18,sample40,sample50,sample9,sample63,sample53,sample77,sample66,sample6
chr10	114276524	114280915	1.54521	0.419241	3.68574	9.61115e-12	2.54102e-10	23	sample10,sample33,sample1,sample65,sample47,sample46,sample31,sample48,sample49,sample17,sample76,sample58,sample59,sample56,sample64,sample35,sample40,sample50,sample9,sample73,sample77,sample66,sample36
chr20	32239087	32244340	3.4012	1.50588	2.25862	9.68408e-12	2.55678e-10	36	sample10,sample27,sample5,sample1,sample55,sample65,sample51,sample47,sample69,sample32,sample31,sample3,sample75,sample62,sample49,sample17,sample68,sample30,sample76,sample58,sample28,sample74,sample56,sample72,sample64,sample44,sample35,sample40,sample9,sample63,sample73,sample53,sample66,sample61,sample6,sample36
chr5	173191090	173194227	2.95157	1.47239	2.00462	9.71988e-12	2.56448e-10	36	sample10,sample5,sample1,sample2,sample51,sample47,sample69,sample54,sample48,sample75,sample7,sample62,sample49,sample17,sample76,sample58,sample28,sample59,sample56,sample72,sample64,sample44,sample35,sample18,sample40,sample50,sample9,sample63,sample73,sample77,sample66,sample60,sample61,sample6,sample37,sample36
chr22	24901522	24904236	2.58208	1.16514	2.21612	9.75372e-12	2.57164e-10	30	sample10,sample5,sample33,sample1,sample2,sample65,sample51,sample47,sample69,sample31,sample48,sample75,sample62,sample49,sample17,sample30,sample76,sample58,sample72,sample64,sample44,sample35,sample40,sample50,sample63,sample53,sample77,sample61,sample6,sample36
chr12	53382095	53388926	3.72183	2.00133	1.85968	9.75946e-12	2.57139e-10	41	sample10,sample5,sample33,sample1,sample55,sample4,sample51,sample47,sample69,sample54,sample31,sample48,sample75,sample7,sample62,sample49,sample17,sample34,sample58,sample28,sample26,sample74,sample70,sample59,sample72,sample64,sample44,sample29,sample35,sample18,sample40,sample9,sample63,sample73,sample53,sample77,sample38,sample66,sample6,sample37,sample36
chr2	106196146	106202481	4.33425	2.16717	1.99996	9.81793e-12	2.58326e-10	40	sample8,sample5,sample45,sample33,sample1,sample55,sample4,sample51,sample47,sample69,sample54,sample32,sample31,sample75,sample62,sample49,sample17,sample30,sample76,sample58,sample28,sample26,sample74,sample70,sample59,sample56,sample64,sample44,sample35,sample40,sample50,sample9,sample63,sample73,sample77,sample38,sample66,sample61,sample6,sample36
chr17	73683487	73698500	5.03048	2.96486	1.6967	9.92556e-12	2.60802e-10	44	sample80,sample27,sample5,sample33,sample1,sample55,sample2,sample65,sample51,sample47,sample69,sample54,sample46,sample3,sample75,sample39,sample62,sample49,sample17,sample68,sample34,sample76,sample58,sample28,sample26,sample74,sample70,sample59,sample56,sample72,sample64,sample44,sample35,sample50,sample9,sample63,sample73,sample53,sample77,sample66,sample60,sample6,sample37,sample36
chr15	59466876	59470555	2.32895	1.52554	1.52665	1.00184e-11	2.62345e-10	14	sample45,sample2,sample47,sample31,sample48,sample75,sample39,sample7,sample17,sample64,sample44,sample29,sample77,sample6
chr12	76413262	76415823	2.88996	1.48508	1.946	1.01804e-11	2.66225e-10	28	sample10,sample5,sample45,sample33,sample1,sample2,sample47,sample69,sample54,sample46,sample31,sample48,sample75,sample39,sample17,sample30,sample76,sample16,sample44,sample18,sample9,sample53,sample77,sample66,sample61,sample6,sample37,sample36
chr5	29067854	29069617	2.05002	0.603516	3.39679	1.0188e-11	2.66244e-10	16	sample51,sample47,sample69,sample32,sample17,sample58,sample28,sample56,sample64,sample40,sample63,sample73,sample77,sample6,sample37,sample36
chr2	17758594	17763627	3.79582	1.70791	2.2225	1.02649e-11	2.67889e-10	32	sample10,sample67,sample1,sample55,sample65,sample51,sample47,sample69,sample54,sample31,sample48,sample75,sample62,sample49,sample17,sample79,sample76,sample58,sample28,sample59,sample56,sample72,sample64,sample35,sample40,sample50,sample9,sample73,sample77,sample66,sample37,sample36
chr6	22826944	22829588	2.34726	0.401701	5.84331	1.02664e-11	2.67748e-10	33	sample5,sample2,sample65,sample69,sample46,sample31,sample48,sample75,sample62,sample49,sample17,sample68,sample30,sample76,sample58,sample59,sample56,sample64,sample44,sample35,sample18,sample40,sample50,sample63,sample73,sample53,sample77,sample66,sample60,sample61,sample6,sample37,sample36
chr7	117711290	117714245	1.82127	0.173078	10.5228	1.03237e-11	2.69058e-10	19	sample10,sample5,sample1,sample65,sample47,sample69,sample31,sample48,sample62,sample49,sample17,sample30,sample64,sample35,sample40,sample63,sample6,sample37,sample36
chr1	37936597	37938401	6.68384	4.42729	1.50969	1.04248e-11	2.71143e-10	16	sample33,sample55,sample2,sample51,sample47,sample75,sample62,sample34,sample76,sample28,sample26,sample18,sample9,sample53,sample77,sample37
chr8	102089181	102094141	4.49402	1.35434	3.31822	1.05006e-11	2.72746e-10	40	sample10,sample27,sample5,sample33,sample1,sample55,sample4,sample2,sample51,sample47,sample69,sample31,sample48,sample75,sample7,sample62,sample49,sample17,sample34,sample30,sample76,sample58,sample74,sample70,sample59,sample72,sample64,sample44,sample35,sample18,sample40,sample9,sample63,sample73,sample53,sample77,sample66,sample61,sample6,sample36
chr8	126179034	126182945	2.91435	1.13931	2.55799	1.0509e-11	2.72781e-10	31	sample10,sample5,sample33,sample1,sample55,sample4,sample51,sample47,sample69,sample54,sample46,sample31,sample48,sample49,sample17,sample76,sample59,sample56,sample64,sample44,sample29,sample35,sample40,sample50,sample9,sample63,sample77,sample66,sample6,sample37,sample36
chr12	47478132	47480082	2.25947	1.14827	1.96773	1.05792e-11	2.74232e-10	20	sample10,sample33,sample1,sample55,sample47,sample69,sample54,sample46,sample31,sample62,sample49,sample17,sample30,sample58,sample16,sample35,sample18,sample63,sample53,sample36
chr6	45533618	45537716	2.07492	0.565113	3.6717	1.05883e-11	2.74283e-10	26	sample33,sample1,sample2,sample51,sample47,sample31,sample75,sample62,sample49,sample30,sample58,sample59,sample64,sample44,sample35,sample18,sample40,sample50,sample9,sample63,sample73,sample77,sample66,sample61,sample6,sample36
chr15	33158795	33160621	1.80433	0.761875	2.36828	1.06939e-11	2.76646e-10	16	sample10,sample33,sample1,sample2,sample46,sample31,sample75,sample7,sample17,sample76,sample16,sample35,sample18,sample50,sample9,sample77
chr5	174808200	174812668	1.59528	0.365563	4.3639	1.0765e-11	2.783e-10	19	sample47,sample69,sample31,sample48,sample62,sample49,sample17,sample30,sample76,sample58,sample59,sample64,sample44,sample35,sample40,sample63,sample73,sample61,sample36
chr8	75162095	75164109	3.6192	1.00073	3.61656	1.0905e-11	2.81541e-10	40	sample43,sample10,sample5,sample42,sample33,sample1,sample55,sample4,sample2,sample65,sample51,sample47,sample69,sample54,sample32,sample46,sample48,sample75,sample49,sample17,sample68,sample34,sample76,sample58,sample26,sample56,sample72,sample64,sample44,sample29,sample35,sample40,sample50,sample9,sample63,sample77,sample66,sample6,sample37,sample36
chr9	99635657	99638265	6.41794	3.0754	2.08686	1.10173e-11	2.84249e-10	32	sample5,sample45,sample33,sample1,sample55,sample47,sample69,sample54,sample32,sample31,sample3,sample75,sample62,sample17,sample76,sample58,sample28,sample26,sample74,sample59,sample56,sample72,sample64,sample35,sample18,sample9,sample73,sample53,sample77,sample6,sample37,sample36
chr17	46559745	46562273	1.58503	0.606436	2.61368	1.10502e-11	2.84908e-10	14	sample10,sample1,sample2,sample51,sample69,sample31,sample75,sample49,sample17,sample34,sample29,sample35,sample77,sample36
chr5	90506665	90510149	2.13822	0.858958	2.48932	1.10628e-11	2.8504e-10	26	sample10,sample5,sample1,sample51,sample47,sample69,sample31,sample3,sample48,sample75,sample62,sample17,sample58,sample72,sample64,sample44,sample35,sample40,sample50,sample9,sample63,sample73,sample77,sample61,sample6,sample36
chr16	71370972	71373325	1.57001	0.169199	9.27907	1.11203e-11	2.8633e-10	21	sample33,sample1,sample55,sample2,sample47,sample31,sample48,sample49,sample17,sample30,sample76,sample58,sample56,sample64,sample35,sample9,sample63,sample53,sample77,sample6,sample36
chr11	95828269	95834048	4.17099	1.78438	2.33751	1.1295e-11	2.8986e-10	43	sample43,sample5,sample42,sample1,sample55,sample65,sample51,sample47,sample69,sample54,sample32,sample31,sample3,sample48,sample75,sample39,sample7,sample62,sample49,sample17,sample34,sample30,sample76,sample58,sample28,sample74,sample59,sample72,sample64,sample44,sample35,sample40,sample50,sample9,sample63,sample73,sample53,sample77,sample38,sample66,sample6,sample37,sample36
chr3	63435349	63438338	2.37373	0.928658	2.55608	1.13e-11	2.89795e-10	27	sample1,sample65,sample51,sample47,sample69,sample32,sample31,sample48,sample49,sample17,sample30,sample58,sample56,sample72,sample64,sample44,sample35,sample40,sample50,sample9,sample63,sample73,sample77,sample66,sample6,sample37,sample36
chr7	17244759	17247499	2.34957	0.356823	6.5847	1.13736e-11	2.91294e-10	29	sample10,sample5,sample33,sample1,sample55,sample4,sample51,sample47,sample31,sample48,sample49,sample17,sample34,sample30,sample58,sample70,sample59,sample72,sample64,sample44,sample29,sample35,sample50,sample9,sample63,sample77,sample66,sample61,sample37
chr14	61643815	61646039	1.61125	0.464773	3.46674	1.14146e-11	2.91761e-10	15	sample10,sample5,sample33,sample2,sample47,sample46,sample48,sample75,sample49,sample34,sample44,sample18,sample50,sample77,sample36
chr2	108879019	108889564	2.83884	1.33984	2.11879	1.146e-11	2.92729e-10	44	sample43,sample10,sample27,sample5,sample42,sample33,sample4,sample2,sample23,sample51,sample47,sample69,sample54,sample46,sample31,sample3,sample48,sample75,sample62,sample49,sample17,sample68,sample34,sample30,sample28,sample26,sample74,sample59,sample56,sample72,sample64,sample29,sample18,sample40,sample50,sample9,sample73,sample53,sample77,sample66,sample60,sample6,sample37,sample36
chr3	172383088	172385319	2.28737	0.877988	2.60523	1.15293e-11	2.94303e-10	24	sample10,sample1,sample4,sample2,sample65,sample51,sample69,sample54,sample32,sample46,sample31,sample3,sample48,sample17,sample58,sample28,sample64,sample9,sample73,sample77,sample66,sample6,sample37,sample36
chr7	20379348	20382215	3.05176	0.842901	3.62055	1.15299e-11	2.94122e-10	38	sample10,sample5,sample1,sample55,sample4,sample65,sample51,sample47,sample69,sample54,sample46,sample31,sample48,sample75,sample62,sample49,sample17,sample30,sample76,sample58,sample28,sample74,sample59,sample64,sample44,sample35,sample18,sample40,sample50,sample9,sample63,sample73,sample77,sample66,sample61,sample6,sample37,sample36
chr3	49386557	49391072	2.61085	1.56543	1.66781	1.16757e-11	2.96859e-10	25	sample10,sample45,sample33,sample1,sample2,sample51,sample47,sample46,sample48,sample75,sample39,sample7,sample34,sample76,sample72,sample64,sample44,sample35,sample18,sample50,sample9,sample53,sample77,sample66,sample37
chr13	44877235	44889171	4.00306	1.89313	2.11451	1.17796e-11	2.99105e-10	48	sample10,sample45,sample33,sample1,sample55,sample2,sample65,sample51,sample47,sample69,sample54,sample46,sample31,sample3,sample48,sample75,sample62,sample49,sample17,sample68,sample34,sample76,sample58,sample28,sample26,sample74,sample70,sample59,sample56,sample72,sample16,sample64,sample44,sample29,sample35,sample18,sample40,sample50,sample9,sample63,sample73,sample53,sample77,sample66,sample6…
chr9	94064431	94066249	2.68819	1.36904	1.96356	1.18381e-11	3.00393e-10	18	sample80,sample10,sample33,sample2,sample47,sample31,sample48,sample75,sample62,sample58,sample28,sample64,sample35,sample18,sample77,sample60,sample6,sample36
chrX	39833093	39835713	2.57447	1.02806	2.50419	1.19081e-11	3.01971e-10	33	sample5,sample1,sample55,sample51,sample47,sample69,sample54,sample32,sample75,sample62,sample49,sample17,sample68,sample34,sample76,sample58,sample28,sample70,sample59,sample56,sample72,sample64,sample44,sample29,sample35,sample40,sample9,sample73,sample77,sample61,sample6,sample37,sample36
chr6	113672689	113675121	2.03579	0.792545	2.56868	1.19292e-11	3.02107e-10	20	sample5,sample33,sample1,sample2,sample51,sample47,sample69,sample31,sample48,sample39,sample49,sample17,sample76,sample35,sample18,sample40,sample63,sample77,sample6,sample36
chr12	125228844	125232855	5.10892	2.7387	1.86545	1.19801e-11	3.03197e-10	33	sample80,sample10,sample33,sample1,sample55,sample2,sample51,sample47,sample69,sample31,sample75,sample39,sample62,sample19,sample49,sample34,sample30,sample76,sample58,sample28,sample26,sample16,sample64,sample44,sample35,sample18,sample63,sample73,sample53,sample77,sample6,sample37,sample36
chr17	25820893	25826249	2.75952	1.30984	2.10676	1.20679e-11	3.05218e-10	29	sample33,sample1,sample55,sample51,sample47,sample69,sample54,sample31,sample48,sample75,sample62,sample17,sample68,sample34,sample30,sample28,sample59,sample64,sample35,sample40,sample50,sample9,sample63,sample73,sample77,sample66,sample61,sample6,sample36
chr3	9392644	9397171	3.65328	2.11131	1.73034	1.21149e-11	3.06004e-10	28	sample5,sample45,sample1,sample51,sample47,sample69,sample54,sample31,sample48,sample75,sample62,sample34,sample76,sample28,sample26,sample74,sample59,sample72,sample64,sample29,sample40,sample50,sample9,sample73,sample66,sample6,sample37,sample36
chr5	15007978	15010994	2.84542	1.50112	1.89553	1.21564e-11	3.06449e-10	28	sample5,sample33,sample1,sample55,sample65,sample51,sample47,sample69,sample31,sample48,sample75,sample39,sample62,sample49,sample17,sample34,sample30,sample76,sample58,sample59,sample56,sample64,sample44,sample9,sample73,sample66,sample37,sample36
chr7	34786423	34789283	2.44034	0.872389	2.7973	1.2223e-11	3.07726e-10	29	sample33,sample1,sample55,sample2,sample65,sample51,sample47,sample69,sample31,sample48,sample75,sample62,sample49,sample30,sample76,sample74,sample56,sample72,sample64,sample44,sample35,sample40,sample9,sample63,sample77,sample66,sample61,sample6,sample36
chr12	115944232	115946794	1.71352	0.330641	5.18241	1.241e-11	3.11821e-10	17	sample1,sample65,sample47,sample69,sample46,sample48,sample62,sample49,sample17,sample58,sample72,sample35,sample9,sample53,sample77,sample66,sample36
chr6	167636489	167638370	1.67293	0.374647	4.46535	1.2454e-11	3.12722e-10	19	sample5,sample1,sample47,sample69,sample31,sample48,sample49,sample58,sample72,sample64,sample35,sample40,sample50,sample53,sample77,sample66,sample61,sample6,sample36
chr6	20877406	20879141	2.25998	0.979874	2.3064	1.24656e-11	3.12811e-10	16	sample10,sample45,sample33,sample2,sample48,sample39,sample7,sample49,sample34,sample76,sample44,sample35,sample18,sample50,sample77,sample36
chr11	75443966	75447347	4.10527	1.90422	2.15587	1.26172e-11	3.15996e-10	37	sample10,sample5,sample42,sample33,sample1,sample65,sample51,sample47,sample69,sample54,sample31,sample3,sample48,sample75,sample62,sample17,sample68,sample34,sample76,sample58,sample28,sample74,sample70,sample59,sample56,sample72,sample64,sample50,sample9,sample63,sample73,sample53,sample77,sample66,sample6,sample37,sample36
chr7	101764448	101767566	3.21915	1.777	1.81156	1.27613e-11	3.18568e-10	28	sample5,sample67,sample1,sample55,sample4,sample51,sample47,sample69,sample54,sample32,sample31,sample48,sample75,sample62,sample17,sample34,sample58,sample28,sample72,sample64,sample44,sample40,sample9,sample73,sample53,sample77,sample6,sample36
chr3	152855793	152859155	3.21545	1.67824	1.91597	1.28205e-11	3.19633e-10	32	sample10,sample5,sample45,sample33,sample1,sample55,sample4,sample51,sample47,sample69,sample54,sample32,sample75,sample7,sample49,sample28,sample70,sample59,sample56,sample72,sample64,sample44,sample29,sample35,sample18,sample9,sample63,sample73,sample77,sample38,sample66,sample36
chr3	185220710	185222501	2.08542	0.852813	2.44534	1.28242e-11	3.19518e-10	19	sample10,sample5,sample1,sample47,sample46,sample31,sample48,sample75,sample62,sample49,sample17,sample76,sample72,sample50,sample63,sample77,sample66,sample61,sample6
chr4	75584095	75587759	2.68774	1.10493	2.43251	1.30638e-11	3.24856e-10	28	sample5,sample42,sample33,sample1,sample55,sample51,sample47,sample69,sample31,sample75,sample62,sample49,sample68,sample30,sample76,sample59,sample56,sample72,sample64,sample44,sample35,sample50,sample9,sample63,sample73,sample6,sample37,sample36
chr8	90809366	90814594	2.96682	0.499637	5.93795	1.30798e-11	3.24836e-10	32	sample10,sample5,sample33,sample1,sample4,sample2,sample47,sample69,sample31,sample48,sample7,sample62,sample49,sample17,sample30,sample76,sample74,sample72,sample64,sample44,sample35,sample50,sample9,sample63,sample73,sample53,sample77,sample66,sample61,sample6,sample37,sample36
chr2	64487362	64491606	2.16705	1.04582	2.0721	1.30943e-11	3.24986e-10	24	sample10,sample45,sample33,sample1,sample2,sample51,sample47,sample31,sample48,sample7,sample49,sample17,sample34,sample58,sample56,sample44,sample29,sample35,sample18,sample50,sample9,sample53,sample77,sample36
chr21	38524650	38527698	2.51211	1.48094	1.69629	1.31946e-11	3.26213e-10	17	sample1,sample51,sample47,sample54,sample32,sample31,sample75,sample49,sample70,sample59,sample72,sample64,sample29,sample9,sample77,sample6,sample36
chr17	15393174	15396631	3.0619	1.45789	2.10022	1.32878e-11	3.28095e-10	32	sample5,sample67,sample33,sample1,sample55,sample2,sample51,sample47,sample69,sample54,sample46,sample31,sample75,sample39,sample17,sample34,sample58,sample28,sample26,sample70,sample59,sample56,sample72,sample64,sample29,sample18,sample9,sample53,sample77,sample66,sample61,sample36
chr1	229335032	229336144	4.14561	1.5143	2.73763	1.33885e-11	3.30371e-10	31	sample43,sample10,sample5,sample42,sample1,sample65,sample47,sample69,sample32,sample46,sample48,sample75,sample62,sample49,sample68,sample76,sample58,sample74,sample59,sample56,sample72,sample64,sample44,sample40,sample50,sample9,sample53,sample77,sample66,sample61,sample36
chr13	99698029	99700110	3.43393	1.83612	1.87021	1.35377e-11	3.33836e-10	21	sample45,sample2,sample65,sample47,sample69,sample32,sample31,sample75,sample17,sample58,sample72,sample64,sample44,sample35,sample40,sample9,sample63,sample53,sample77,sample6,sample36
chr6	76444364	76446878	2.09478	0.892431	2.34727	1.36217e-11	3.3548e-10	21	sample33,sample1,sample65,sample51,sample47,sample69,sample31,sample48,sample17,sample30,sample58,sample59,sample64,sample29,sample35,sample40,sample9,sample53,sample77,sample66,sample36
chr8	37547657	37551059	2.51763	1.26377	1.99216	1.36432e-11	3.3558e-10	21	sample1,sample65,sample51,sample47,sample32,sample31,sample48,sample75,sample62,sample49,sample64,sample29,sample35,sample18,sample9,sample63,sample77,sample66,sample61,sample6,sample36
chr22	35705357	35711714	3.82503	1.91975	1.99247	1.38339e-11	3.39185e-10	31	sample5,sample42,sample1,sample55,sample47,sample69,sample31,sample48,sample75,sample7,sample62,sample49,sample17,sample68,sample76,sample58,sample28,sample74,sample72,sample64,sample44,sample35,sample18,sample40,sample9,sample73,sample53,sample77,sample66,sample60,sample36
chr11	117778241	117778784	4.05481	1.83626	2.20819	1.40042e-11	3.42489e-10	23	sample10,sample1,sample51,sample47,sample69,sample32,sample46,sample31,sample48,sample75,sample17,sample58,sample56,sample72,sample64,sample29,sample35,sample9,sample63,sample73,sample53,sample66,sample36
chr20	48702254	48703867	3.31307	1.71446	1.93242	1.40264e-11	3.42815e-10	29	sample10,sample42,sample33,sample1,sample55,sample2,sample65,sample47,sample32,sample31,sample48,sample75,sample7,sample17,sample74,sample56,sample72,sample64,sample44,sample35,sample18,sample40,sample63,sample53,sample77,sample66,sample6,sample37,sample36
chr7	20341997	20346915	2.97818	1.07985	2.75795	1.4181e-11	3.45715e-10	41	sample10,sample5,sample33,sample1,sample55,sample4,sample65,sample51,sample47,sample69,sample54,sample46,sample31,sample75,sample62,sample49,sample17,sample68,sample30,sample76,sample58,sample74,sample59,sample56,sample72,sample64,sample44,sample35,sample18,sample40,sample50,sample9,sample63,sample73,sample53,sample77,sample66,sample61,sample6,sample37,sample36
chr10	63510476	63515393	2.98774	1.17907	2.53398	1.42249e-11	3.46346e-10	39	sample43,sample5,sample42,sample1,sample55,sample65,sample51,sample47,sample69,sample54,sample32,sample46,sample31,sample48,sample75,sample62,sample49,sample17,sample68,sample30,sample76,sample58,sample28,sample74,sample70,sample59,sample56,sample64,sample44,sample35,sample40,sample50,sample9,sample73,sample53,sample77,sample66,sample37,sample36
chr7	138248357	138251109	1.77941	0.394142	4.51463	1.42896e-11	3.47483e-10	16	sample1,sample2,sample51,sample47,sample69,sample54,sample46,sample48,sample17,sample58,sample72,sample35,sample9,sample73,sample77,sample6
chr13	73822759	73824838	3.17162	1.02178	3.10403	1.43244e-11	3.47888e-10	38	sample5,sample33,sample1,sample2,sample65,sample51,sample47,sample69,sample54,sample32,sample31,sample48,sample75,sample49,sample17,sample34,sample30,sample76,sample58,sample70,sample59,sample56,sample72,sample64,sample44,sample29,sample35,sample18,sample40,sample50,sample9,sample63,sample73,sample53,sample77,sample66,sample6,sample36
chr3	172324727	172326901	2.52057	1.06713	2.36202	1.44375e-11	3.50415e-10	25	sample4,sample2,sample65,sample47,sample69,sample54,sample46,sample31,sample48,sample75,sample62,sample49,sample68,sample58,sample64,sample44,sample35,sample50,sample73,sample77,sample66,sample61,sample6,sample37,sample36
chr8	144973232	144975207	2.47809	0.561828	4.41076	1.4753e-11	3.57396e-10	25	sample10,sample42,sample1,sample51,sample47,sample69,sample31,sample75,sample62,sample49,sample17,sample68,sample30,sample76,sample58,sample74,sample72,sample64,sample44,sample35,sample9,sample63,sample77,sample6,sample36
chr3	8652701	8653952	2.02587	0.762638	2.6564	1.48165e-11	3.58708e-10	15	sample10,sample33,sample1,sample51,sample47,sample48,sample75,sample74,sample18,sample50,sample63,sample73,sample66,sample6,sample36
chr22	43257209	43260231	1.66754	0.73764	2.26064	1.48259e-11	3.5871e-10	16	sample10,sample1,sample2,sample51,sample47,sample75,sample49,sample17,sample76,sample35,sample18,sample40,sample50,sample9,sample77,sample36
chr19	41508535	41510940	2.52811	0.469134	5.38889	1.49949e-11	3.62115e-10	26	sample10,sample5,sample51,sample69,sample32,sample31,sample48,sample75,sample62,sample49,sample17,sample68,sample30,sample56,sample72,sample64,sample40,sample50,sample9,sample63,sample73,sample66,sample61,sample6,sample37,sample36
chrX	114578737	114580524	2.15293	1.05144	2.04761	1.53214e-11	3.68385e-10	17	sample1,sample2,sample65,sample47,sample48,sample62,sample49,sample17,sample76,sample64,sample44,sample35,sample40,sample50,sample73,sample77,sample36
chr1	223958758	223960791	2.59759	1.28442	2.02238	1.53949e-11	3.69227e-10	19	sample33,sample1,sample2,sample51,sample47,sample46,sample31,sample48,sample75,sample34,sample30,sample76,sample58,sample44,sample35,sample18,sample9,sample63,sample77
chr7	75715648	75720011	2.17828	0.824115	2.64317	1.54187e-11	3.69338e-10	27	sample10,sample33,sample1,sample4,sample2,sample51,sample47,sample69,sample54,sample32,sample46,sample31,sample3,sample48,sample17,sample34,sample76,sample28,sample59,sample44,sample29,sample18,sample9,sample77,sample6,sample37,sample36
chr2	85183900	85187813	2.69159	1.02162	2.63463	1.55407e-11	3.71568e-10	33	sample10,sample33,sample1,sample4,sample2,sample51,sample47,sample69,sample54,sample32,sample46,sample31,sample48,sample75,sample49,sample17,sample34,sample30,sample76,sample58,sample28,sample70,sample59,sample29,sample35,sample18,sample9,sample63,sample53,sample77,sample60,sample6,sample36
chr9	132340264	132344441	2.71779	1.09009	2.49317	1.55592e-11	3.71779e-10	30	sample43,sample5,sample1,sample55,sample2,sample65,sample47,sample69,sample32,sample31,sample75,sample62,sample49,sample17,sample68,sample30,sample76,sample72,sample64,sample44,sample35,sample40,sample50,sample63,sample73,sample53,sample77,sample66,sample61,sample36
chr7	127545703	127548560	2.0842	0.935925	2.22689	1.57215e-11	3.74959e-10	18	sample1,sample65,sample51,sample47,sample69,sample31,sample48,sample62,sample17,sample58,sample64,sample44,sample35,sample40,sample50,sample63,sample6,sample36
chrX	30675050	30678390	2.41309	1.00101	2.41065	1.5736e-11	3.7484e-10	29	sample10,sample5,sample1,sample55,sample65,sample47,sample69,sample31,sample48,sample75,sample62,sample49,sample17,sample34,sample58,sample72,sample64,sample44,sample29,sample35,sample18,sample40,sample50,sample9,sample53,sample77,sample66,sample6,sample36
chr8	128255245	128266986	4.07697	0.39674	10.2762	1.58243e-11	3.76246e-10	40	sample43,sample10,sample27,sample5,sample42,sample33,sample1,sample55,sample2,sample23,sample47,sample69,sample32,sample46,sample31,sample75,sample62,sample49,sample68,sample30,sample76,sample74,sample70,sample59,sample56,sample72,sample64,sample44,sample35,sample40,sample50,sample9,sample63,sample73,sample77,sample66,sample61,sample6,sample37,sample36
chr21	34751801	34757860	3.94314	2.52035	1.56452	1.62254e-11	3.84594e-10	21	sample45,sample55,sample2,sample47,sample3,sample48,sample75,sample39,sample17,sample34,sample58,sample59,sample72,sample64,sample35,sample18,sample9,sample53,sample77,sample37,sample36
chr12	83044008	83045855	2.22408	0.706308	3.14889	1.62776e-11	3.85593e-10	27	sample10,sample33,sample1,sample2,sample51,sample47,sample69,sample54,sample46,sample31,sample48,sample49,sample17,sample76,sample58,sample59,sample56,sample64,sample44,sample29,sample35,sample40,sample9,sample63,sample77,sample37,sample36
chr20	52542510	52544015	4.23219	2.56137	1.65231	1.6379e-11	3.87044e-10	25	sample5,sample42,sample45,sample2,sample65,sample47,sample69,sample54,sample32,sample31,sample48,sample75,sample7,sample17,sample79,sample30,sample59,sample64,sample35,sample18,sample40,sample9,sample63,sample77,sample6
chr1	169116216	169118556	2.11645	0.857673	2.46767	1.64188e-11	3.87747e-10	27	sample33,sample1,sample2,sample65,sample51,sample47,sample69,sample31,sample48,sample62,sample49,sample17,sample68,sample58,sample59,sample56,sample64,sample35,sample40,sample50,sample9,sample53,sample77,sample66,sample6,sample37,sample36
chr7	46360707	46362410	2.65852	0.216995	12.2516	1.65423e-11	3.90182e-10	26	sample10,sample5,sample42,sample1,sample65,sample47,sample69,sample48,sample75,sample62,sample49,sample17,sample76,sample56,sample64,sample44,sample35,sample40,sample50,sample63,sample77,sample66,sample61,sample6,sample37,sample36
chr2	106028033	106029655	2.63333	1.19813	2.19787	1.65597e-11	3.90354e-10	22	sample10,sample5,sample33,sample51,sample47,sample46,sample31,sample48,sample58,sample59,sample56,sample64,sample44,sample35,sample18,sample40,sample9,sample63,sample77,sample66,sample6,sample36
chr22	30621852	30623311	2.15537	0.84636	2.54664	1.67407e-11	3.94381e-10	14	sample1,sample2,sample51,sample47,sample69,sample75,sample17,sample70,sample64,sample18,sample9,sample77,sample66,sample61
chr11	22655910	22657807	2.28627	0.752793	3.03705	1.68266e-11	3.95919e-10	20	sample1,sample65,sample47,sample69,sample31,sample75,sample62,sample49,sample17,sample76,sample72,sample64,sample35,sample40,sample50,sample63,sample73,sample61,sample6,sample36
chr5	123623569	123627527	2.06301	0.519892	3.96815	1.68527e-11	3.96291e-10	20	sample1,sample47,sample69,sample31,sample48,sample62,sample17,sample30,sample76,sample58,sample56,sample72,sample64,sample35,sample40,sample50,sample9,sample63,sample73,sample36
chr7	80512319	80514944	1.96097	0.694897	2.82197	1.69092e-11	3.97377e-10	14	sample65,sample47,sample69,sample46,sample48,sample49,sample17,sample76,sample64,sample35,sample40,sample73,sample6,sample36
chr3	119513175	119515899	3.48193	1.61619	2.15441	1.69721e-11	3.98612e-10	35	sample10,sample5,sample33,sample1,sample51,sample47,sample69,sample54,sample32,sample31,sample75,sample62,sample49,sample68,sample76,sample58,sample28,sample26,sample74,sample59,sample56,sample72,sample64,sample44,sample35,sample18,sample40,sample50,sample9,sample63,sample77,sample66,sample6,sample37,sample36
chr20	24909959	24912955	3.71462	2.07942	1.78638	1.70263e-11	3.9964e-10	30	sample27,sample5,sample1,sample4,sample69,sample54,sample32,sample31,sample75,sample62,sample49,sample17,sample68,sample30,sample28,sample74,sample59,sample56,sample64,sample44,sample35,sample50,sample9,sample73,sample53,sample77,sample38,sample6,sample37,sample36
chr1	68189285	68191479	2.07806	0.846492	2.45491	1.70693e-11	4.00162e-10	16	sample33,sample1,sample2,sample51,sample47,sample31,sample48,sample49,sample17,sample58,sample29,sample35,sample9,sample77,sample6,sample36
chrX	24509160	24514399	2.17134	1.07684	2.0164	1.71633e-11	4.01876e-10	34	sample5,sample1,sample55,sample47,sample69,sample32,sample31,sample75,sample62,sample49,sample17,sample68,sample30,sample76,sample58,sample28,sample59,sample56,sample72,sample64,sample44,sample35,sample18,sample40,sample50,sample9,sample63,sample73,sample53,sample77,sample38,sample66,sample6,sample36
chr1	149249378	149252324	2.85036	1.31642	2.16523	1.72118e-11	4.02523e-10	28	sample33,sample1,sample51,sample47,sample69,sample54,sample31,sample48,sample62,sample17,sample30,sample76,sample58,sample28,sample59,sample64,sample44,sample29,sample35,sample50,sample9,sample73,sample53,sample77,sample66,sample6,sample37,sample36
chr1	26404402	26406699	2.68908	0.49138	5.47251	1.7247e-11	4.02856e-10	33	sample43,sample5,sample1,sample55,sample2,sample65,sample51,sample47,sample31,sample48,sample75,sample62,sample49,sample17,sample68,sample30,sample76,sample74,sample72,sample64,sample44,sample35,sample18,sample40,sample50,sample9,sample63,sample73,sample77,sample66,sample61,sample6,sample36
chr5	127228717	127229463	2.28625	0.45115	5.06761	1.72528e-11	4.02746e-10	15	sample33,sample1,sample51,sample47,sample69,sample31,sample17,sample34,sample58,sample29,sample35,sample40,sample9,sample77,sample36
chr11	48039149	48042785	3.13455	1.53922	2.03646	1.73107e-11	4.03852e-10	34	sample43,sample10,sample5,sample42,sample45,sample1,sample65,sample51,sample69,sample54,sample32,sample46,sample3,sample48,sample75,sample7,sample68,sample34,sample58,sample56,sample72,sample64,sample44,sample35,sample18,sample40,sample50,sample9,sample63,sample53,sample77,sample66,sample37,sample36
chr2	96306237	96308640	2.04492	0.671337	3.04604	1.7328e-11	4.04013e-10	15	sample80,sample32,sample75,sample49,sample76,sample74,sample56,sample72,sample64,sample50,sample73,sample66,sample60,sample61,sample36
chr13	98865700	98868708	3.17929	1.32513	2.39923	1.73369e-11	4.03975e-10	31	sample5,sample42,sample1,sample55,sample65,sample51,sample69,sample31,sample3,sample48,sample75,sample62,sample49,sample17,sample68,sample76,sample74,sample72,sample64,sample44,sample35,sample18,sample40,sample50,sample63,sample73,sample77,sample66,sample6,sample37,sample36
chr7	76084978	76090434	4.97971	2.29462	2.17016	1.73849e-11	4.04603e-10	31	sample10,sample5,sample67,sample1,sample4,sample47,sample54,sample32,sample31,sample3,sample48,sample75,sample62,sample17,sample34,sample76,sample58,sample28,sample74,sample70,sample72,sample64,sample44,sample35,sample40,sample9,sample77,sample66,sample6,sample37,sample36
chr6	28907473	28909662	3.30882	2.04653	1.6168	1.74455e-11	4.05769e-10	19	sample45,sample2,sample51,sample47,sample48,sample75,sample62,sample68,sample79,sample76,sample28,sample59,sample35,sample9,sample53,sample77,sample66,sample37,sample36
chr2	174903466	174905141	4.08933	2.6455	1.54577	1.75051e-11	4.06663e-10	18	sample5,sample45,sample55,sample2,sample47,sample31,sample48,sample75,sample17,sample34,sample79,sample26,sample59,sample72,sample64,sample35,sample77,sample36
chr9	20197475	20199561	1.9197	0.350344	5.47946	1.76328e-11	4.09136e-10	19	sample1,sample65,sample47,sample69,sample62,sample17,sample76,sample58,sample74,sample72,sample35,sample40,sample50,sample63,sample73,sample53,sample66,sample6,sample36
chr2	114081439	114083948	3.05127	1.2199	2.50124	1.77213e-11	4.10942e-10	35	sample43,sample10,sample5,sample33,sample1,sample55,sample51,sample47,sample69,sample32,sample31,sample48,sample75,sample7,sample62,sample49,sample17,sample30,sample58,sample74,sample59,sample72,sample64,sample44,sample35,sample40,sample9,sample63,sample73,sample53,sample77,sample66,sample6,sample37,sample36
chr11	66896781	66899163	1.80667	0.979422	1.84463	1.7808e-11	4.12455e-10	15	sample42,sample47,sample31,sample48,sample75,sample49,sample68,sample76,sample58,sample70,sample72,sample64,sample44,sample53,sample36
chr3	161570787	161573261	1.83342	0.469758	3.90291	1.78322e-11	4.12768e-10	18	sample10,sample33,sample65,sample51,sample47,sample54,sample49,sample17,sample76,sample58,sample64,sample29,sample35,sample18,sample9,sample73,sample77,sample36
chr13	34593255	34595308	2.09084	0.222039	9.41653	1.79019e-11	4.14133e-10	15	sample1,sample65,sample69,sample54,sample32,sample48,sample17,sample58,sample64,sample35,sample40,sample50,sample53,sample6,sample36
chrX	39828308	39830358	2.8695	0.770524	3.72409	1.8159e-11	4.19574e-10	29	sample10,sample1,sample65,sample51,sample47,sample69,sample54,sample32,sample46,sample75,sample49,sample17,sample76,sample58,sample28,sample59,sample56,sample72,sample64,sample44,sample29,sample35,sample40,sample50,sample9,sample63,sample77,sample6,sample36
chr3	30330131	30332522	2.35112	1.32497	1.77447	1.82361e-11	4.21103e-10	22	sample33,sample47,sample69,sample32,sample31,sample48,sample49,sample68,sample30,sample74,sample59,sample64,sample44,sample29,sample40,sample50,sample9,sample63,sample66,sample61,sample6,sample36
chr7	106238940	106240405	2.98109	0.844967	3.52805	1.85527e-11	4.2739e-10	37	sample10,sample5,sample42,sample1,sample65,sample51,sample47,sample69,sample32,sample46,sample31,sample48,sample75,sample62,sample49,sample17,sample30,sample76,sample58,sample74,sample56,sample72,sample64,sample44,sample35,sample18,sample40,sample9,sample63,sample73,sample53,sample77,sample66,sample61,sample6,sample37,sample36
chr14	69479562	69481967	2.83016	1.56026	1.81391	1.87082e-11	4.30456e-10	22	sample10,sample1,sample51,sample47,sample69,sample31,sample48,sample75,sample62,sample49,sample17,sample68,sample34,sample30,sample58,sample74,sample72,sample9,sample63,sample77,sample6,sample36
chr6	151280283	151281310	2.07142	0.97002	2.13544	1.87298e-11	4.30697e-10	14	sample1,sample51,sample47,sample58,sample56,sample72,sample64,sample35,sample40,sample50,sample9,sample77,sample66,sample36
chr5	67065361	67071716	2.30007	0.650389	3.53646	1.87339e-11	4.30534e-10	27	sample5,sample1,sample65,sample51,sample47,sample69,sample46,sample31,sample48,sample62,sample17,sample76,sample58,sample59,sample56,sample72,sample64,sample44,sample35,sample40,sample50,sample9,sample63,sample77,sample66,sample6,sample36
chr3	107850286	107853696	2.62566	0.968202	2.71189	1.88671e-11	4.33334e-10	32	sample10,sample45,sample33,sample1,sample2,sample65,sample51,sample47,sample69,sample46,sample31,sample48,sample75,sample62,sample49,sample30,sample76,sample58,sample28,sample59,sample64,sample44,sample35,sample40,sample50,sample9,sample63,sample73,sample77,sample66,sample61,sample36
chr10	121073600	121079634	3.23951	1.49189	2.17141	1.9004e-11	4.357e-10	44	sample80,sample43,sample10,sample27,sample42,sample33,sample1,sample55,sample2,sample65,sample51,sample47,sample32,sample46,sample31,sample48,sample75,sample62,sample49,sample17,sample34,sample30,sample76,sample58,sample26,sample74,sample70,sample56,sample72,sample16,sample64,sample44,sample29,sample35,sample18,sample40,sample50,sample9,sample63,sample53,sample77,sample6,sample37,sample36
chr1	24609592	24611232	1.77211	0.704807	2.51432	1.90712e-11	4.3698e-10	14	sample33,sample2,sample51,sample47,sample31,sample49,sample64,sample35,sample40,sample9,sample77,sample66,sample6,sample36
chr2	20775733	20780346	3.96159	2.53607	1.5621	1.91867e-11	4.39104e-10	33	sample80,sample45,sample33,sample1,sample55,sample2,sample65,sample51,sample69,sample46,sample48,sample75,sample39,sample62,sample49,sample17,sample76,sample58,sample28,sample26,sample74,sample59,sample56,sample64,sample44,sample35,sample18,sample40,sample50,sample63,sample77,sample60,sample36
chr20	50349937	50385774	5.93939	2.73024	2.17541	1.92135e-11	4.39457e-10	51	sample43,sample10,sample27,sample5,sample45,sample33,sample1,sample55,sample4,sample23,sample51,sample47,sample69,sample54,sample32,sample46,sample31,sample3,sample75,sample7,sample62,sample49,sample17,sample68,sample34,sample30,sample58,sample28,sample26,sample74,sample59,sample56,sample72,sample64,sample44,sample29,sample35,sample18,sample40,sample50,sample9,sample63,sample73,sample53,sample77,…
chr20	8581330	8583696	2.02538	0.692717	2.92382	1.92426e-11	4.39859e-10	20	sample43,sample10,sample5,sample65,sample51,sample69,sample54,sample31,sample49,sample58,sample74,sample64,sample35,sample40,sample9,sample63,sample77,sample61,sample37,sample36
chr8	123816492	123819325	2.45287	0.906253	2.70661	1.93463e-11	4.41706e-10	18	sample33,sample1,sample2,sample51,sample47,sample48,sample49,sample17,sample58,sample56,sample64,sample29,sample35,sample50,sample9,sample77,sample6,sample36
chr16	88183495	88186093	2.481	0.637694	3.89058	1.94174e-11	4.42543e-10	31	sample43,sample10,sample1,sample51,sample47,sample69,sample32,sample31,sample75,sample62,sample49,sample17,sample30,sample76,sample58,sample74,sample56,sample72,sample64,sample44,sample29,sample35,sample40,sample50,sample9,sample73,sample77,sample66,sample61,sample6,sample36
chr12	32100806	32103329	1.69932	0.428186	3.96866	1.97851e-11	4.49326e-10	18	sample5,sample33,sample47,sample69,sample31,sample48,sample75,sample62,sample49,sample17,sample68,sample58,sample56,sample64,sample50,sample63,sample77,sample36
chr1	8076987	8084284	1.6935	0.840647	2.01452	1.98664e-11	4.50905e-10	20	sample10,sample33,sample1,sample65,sample51,sample47,sample54,sample31,sample48,sample75,sample49,sample30,sample58,sample44,sample35,sample9,sample77,sample66,sample6,sample36
chr5	64235272	64236375	2.54559	0.704113	3.61531	1.98882e-11	4.51136e-10	19	sample10,sample33,sample1,sample4,sample51,sample47,sample69,sample46,sample48,sample75,sample62,sample76,sample58,sample72,sample50,sample9,sample63,sample77,sample66
chr9	75087553	75090006	2.16442	1.07971	2.00464	1.98899e-11	4.50908e-10	17	sample10,sample5,sample51,sample47,sample46,sample31,sample62,sample49,sample17,sample76,sample59,sample64,sample44,sample35,sample77,sample66,sample36
chr8	48264559	48267828	3.90985	1.79625	2.17667	1.99806e-11	4.52431e-10	33	sample43,sample5,sample42,sample45,sample33,sample1,sample2,sample23,sample47,sample69,sample54,sample31,sample48,sample75,sample62,sample49,sample76,sample58,sample74,sample59,sample72,sample64,sample44,sample35,sample40,sample50,sample9,sample73,sample77,sample66,sample6,sample37,sample36
chr2	182642730	182646772	4.2249	2.37292	1.78047	2.00147e-11	4.52672e-10	26	sample5,sample45,sample33,sample1,sample65,sample51,sample47,sample69,sample31,sample62,sample49,sample17,sample28,sample59,sample64,sample44,sample35,sample18,sample9,sample73,sample53,sample77,sample66,sample6,sample37,sample36
chr7	73887238	73898568	4.97016	2.42006	2.05373	2.03129e-11	4.58337e-10	41	sample10,sample33,sample1,sample55,sample4,sample2,sample23,sample51,sample47,sample69,sample32,sample3,sample48,sample75,sample62,sample49,sample17,sample68,sample34,sample76,sample58,sample28,sample26,sample74,sample70,sample72,sample16,sample64,sample35,sample18,sample40,sample9,sample63,sample73,sample53,sample77,sample66,sample60,sample6,sample37,sample36
chr3	171846259	171849160	2.55	1.51007	1.68867	2.03214e-11	4.58262e-10	23	sample42,sample45,sample33,sample2,sample47,sample46,sample48,sample75,sample7,sample49,sample17,sample68,sample34,sample58,sample72,sample16,sample64,sample44,sample35,sample18,sample50,sample77,sample36
chr12	55892236	55894879	1.73122	0.572381	3.0246	2.03257e-11	4.58089e-10	16	sample5,sample69,sample31,sample62,sample17,sample68,sample58,sample64,sample44,sample35,sample9,sample63,sample73,sample53,sample61,sample6
chr5	73656376	73658943	2.65932	1.12803	2.35748	2.04245e-11	4.60048e-10	29	sample33,sample1,sample51,sample47,sample69,sample32,sample31,sample62,sample17,sample30,sample58,sample74,sample57,sample70,sample59,sample72,sample64,sample44,sample35,sample40,sample50,sample9,sample63,sample73,sample77,sample66,sample61,sample6,sample36
chr18	3036332	3038739	1.97464	1.03539	1.90714	2.05432e-11	4.62451e-10	22	sample10,sample33,sample2,sample51,sample47,sample69,sample54,sample31,sample48,sample75,sample68,sample58,sample70,sample59,sample72,sample64,sample44,sample35,sample9,sample77,sample66,sample36
chr11	74242971	74247179	2.40342	0.451189	5.32685	2.05496e-11	4.62053e-10	30	sample5,sample42,sample1,sample55,sample2,sample51,sample47,sample46,sample31,sample48,sample62,sample49,sample68,sample34,sample30,sample76,sample58,sample72,sample64,sample44,sample35,sample18,sample50,sample9,sample63,sample73,sample77,sample66,sample61,sample36
chr10	18898912	18900775	2.68826	1.56852	1.71388	2.05837e-11	4.62551e-10	19	sample33,sample1,sample51,sample47,sample54,sample31,sample17,sample68,sample58,sample59,sample56,sample72,sample29,sample35,sample50,sample9,sample77,sample6,sample36
chr1	207177918	207184525	2.8004	1.14593	2.44378	2.06207e-11	4.63111e-10	37	sample43,sample10,sample5,sample33,sample1,sample55,sample2,sample51,sample47,sample69,sample54,sample32,sample46,sample31,sample48,sample75,sample62,sample49,sample17,sample30,sample76,sample58,sample74,sample70,sample72,sample64,sample35,sample40,sample50,sample9,sample73,sample53,sample77,sample66,sample6,sample37,sample36
chr6	88508349	88511071	1.8641	0.445064	4.18839	2.08319e-11	4.6731e-10	24	sample5,sample1,sample2,sample65,sample47,sample69,sample46,sample31,sample75,sample62,sample49,sample17,sample68,sample30,sample56,sample64,sample35,sample40,sample50,sample63,sample53,sample66,sample6,sample36
chr8	98709137	98709937	2.95906	1.42136	2.08185	2.10422e-11	4.71477e-10	15	sample1,sample65,sample51,sample47,sample62,sample49,sample76,sample72,sample64,sample9,sample73,sample77,sample66,sample6,sample36
chr20	2279757	2282873	2.07605	0.998275	2.07963	2.10433e-11	4.71228e-10	15	sample10,sample47,sample32,sample48,sample75,sample62,sample49,sample34,sample72,sample64,sample35,sample53,sample77,sample37,sample36
chr12	52829190	52837054	1.88546	0.402613	4.68305	2.11059e-11	4.72355e-10	22	sample1,sample2,sample51,sample47,sample69,sample31,sample75,sample62,sample49,sample17,sample34,sample30,sample76,sample58,sample64,sample35,sample18,sample9,sample73,sample77,sample66,sample61
chr5	139112092	139114909	4.29729	0.943167	4.55624	2.11299e-11	4.72069e-10	39	sample10,sample5,sample1,sample65,sample23,sample51,sample47,sample69,sample46,sample31,sample75,sample62,sample49,sample17,sample34,sample30,sample58,sample74,sample70,sample59,sample56,sample72,sample64,sample44,sample35,sample18,sample40,sample50,sample9,sample63,sample73,sample53,sample77,sample38,sample66,sample60,sample61,sample6,sample36
chr7	155711520	155713024	2.38168	1.0292	2.3141	2.14503e-11	4.77287e-10	18	sample33,sample1,sample55,sample47,sample46,sample3,sample48,sample62,sample17,sample76,sample58,sample74,sample72,sample64,sample44,sample9,sample66,sample36
chr8	74473478	74476353	2.44032	0.980446	2.48899	2.17579e-11	4.83016e-10	27	sample1,sample4,sample65,sample51,sample47,sample69,sample31,sample48,sample62,sample49,sample17,sample58,sample74,sample70,sample59,sample64,sample35,sample40,sample50,sample9,sample63,sample73,sample53,sample66,sample6,sample37,sample36
chr19	42210532	42294190	4.62238	2.02875	2.27843	2.17715e-11	4.83039e-10	57	sample43,sample10,sample27,sample8,sample5,sample42,sample45,sample67,sample33,sample1,sample55,sample4,sample2,sample65,sample51,sample47,sample69,sample54,sample32,sample46,sample31,sample3,sample75,sample7,sample62,sample49,sample17,sample68,sample34,sample79,sample30,sample76,sample58,sample28,sample26,sample57,sample70,sample59,sample56,sample72,sample64,sample44,sample29,sample35,sample18,s…
chr3	14492922	14495726	3.59259	2.21474	1.62213	2.17985e-11	4.8336e-10	22	sample33,sample1,sample4,sample51,sample47,sample69,sample75,sample39,sample34,sample76,sample58,sample28,sample26,sample74,sample72,sample64,sample18,sample73,sample53,sample77,sample6,sample36
chr11	113375370	113378248	2.18645	0.3875	5.64245	2.19179e-11	4.85447e-10	27	sample43,sample5,sample1,sample55,sample65,sample47,sample69,sample31,sample75,sample62,sample17,sample30,sample58,sample56,sample64,sample44,sample35,sample40,sample50,sample63,sample73,sample53,sample66,sample61,sample6,sample37,sample36
chr14	24860484	24863332	2.56583	0.811647	3.16127	2.20315e-11	4.87682e-10	27	sample10,sample33,sample2,sample51,sample47,sample69,sample46,sample31,sample48,sample75,sample62,sample49,sample30,sample76,sample58,sample74,sample72,sample35,sample40,sample9,sample63,sample73,sample53,sample66,sample6,sample37,sample36
chr6	76558443	76560417	1.95362	0.917762	2.12867	2.244e-11	4.95585e-10	24	sample33,sample4,sample2,sample65,sample51,sample47,sample69,sample31,sample48,sample62,sample49,sample17,sample68,sample30,sample59,sample72,sample64,sample40,sample9,sample77,sample66,sample61,sample6,sample37
chr6	10403617	10406214	3.3535	1.33005	2.52133	2.24952e-11	4.9652e-10	36	sample10,sample33,sample2,sample51,sample47,sample69,sample54,sample31,sample3,sample48,sample75,sample62,sample49,sample68,sample34,sample30,sample58,sample28,sample26,sample74,sample70,sample59,sample56,sample72,sample35,sample18,sample9,sample73,sample53,sample77,sample38,sample66,sample61,sample6,sample37,sample36
chr5	35128998	35131720	2.0205	0.790424	2.55622	2.2498e-11	4.96297e-10	20	sample10,sample1,sample55,sample51,sample47,sample69,sample31,sample75,sample62,sample49,sample58,sample64,sample35,sample40,sample9,sample63,sample73,sample66,sample6,sample36
chr10	129788440	129790916	2.11033	0.99211	2.12712	2.25964e-11	4.97044e-10	16	sample10,sample2,sample47,sample48,sample75,sample39,sample7,sample49,sample34,sample76,sample44,sample18,sample50,sample77,sample60,sample36
chr1	204159288	204161156	2.14986	0.735738	2.92205	2.2659e-11	4.97851e-10	23	sample43,sample1,sample55,sample65,sample51,sample47,sample69,sample32,sample31,sample75,sample62,sample49,sample17,sample30,sample74,sample72,sample64,sample40,sample63,sample73,sample66,sample61,sample36
chr15	86327943	86330827	2.87871	1.49003	1.93199	2.27689e-11	4.99696e-10	29	sample43,sample10,sample5,sample1,sample55,sample51,sample69,sample32,sample31,sample48,sample75,sample62,sample49,sample17,sample30,sample58,sample74,sample72,sample64,sample35,sample40,sample9,sample73,sample53,sample77,sample66,sample6,sample37,sample36
chr7	102791050	102794452	12.1716	4.96522	2.45137	2.29265e-11	5.02867e-10	19	sample5,sample45,sample1,sample51,sample47,sample69,sample32,sample31,sample75,sample62,sample17,sample26,sample74,sample70,sample72,sample40,sample73,sample77,sample36
chr13	73817712	73820127	2.06308	0.345265	5.97535	2.31957e-11	5.07616e-10	20	sample1,sample65,sample31,sample75,sample49,sample17,sample58,sample56,sample72,sample64,sample35,sample18,sample40,sample50,sample9,sample63,sample77,sample66,sample6,sample36
chr7	76583350	76588488	5.60526	2.22698	2.51698	2.3196e-11	5.07334e-10	42	sample10,sample5,sample45,sample67,sample1,sample55,sample4,sample2,sample51,sample47,sample69,sample54,sample32,sample31,sample3,sample48,sample75,sample62,sample49,sample17,sample30,sample76,sample58,sample28,sample74,sample70,sample59,sample72,sample64,sample44,sample35,sample40,sample9,sample63,sample73,sample53,sample77,sample66,sample61,sample6,sample37,sample36
chr6	43888994	43897499	3.68009	1.76727	2.08236	2.38916e-11	5.19302e-10	37	sample5,sample42,sample33,sample1,sample55,sample4,sample2,sample51,sample47,sample69,sample32,sample31,sample3,sample75,sample62,sample17,sample30,sample58,sample74,sample59,sample56,sample72,sample64,sample44,sample35,sample40,sample50,sample9,sample63,sample73,sample53,sample77,sample66,sample61,sample6,sample37,sample36
chr22	25338004	25344224	2.5948	0.977607	2.65424	2.43413e-11	5.27884e-10	32	sample10,sample1,sample55,sample65,sample51,sample47,sample69,sample54,sample46,sample31,sample3,sample48,sample62,sample49,sample17,sample34,sample30,sample76,sample58,sample28,sample72,sample64,sample44,sample29,sample35,sample40,sample9,sample73,sample53,sample66,sample6,sample36
chr9	96856607	96857537	2.94083	0.761742	3.86067	2.43963e-11	5.28778e-10	30	sample10,sample1,sample2,sample51,sample47,sample69,sample54,sample32,sample31,sample48,sample75,sample49,sample17,sample30,sample76,sample58,sample74,sample70,sample59,sample72,sample64,sample18,sample50,sample9,sample63,sample73,sample53,sample77,sample66,sample6
chr7	65225505	65228544	2.59444	0.95354	2.72085	2.44848e-11	5.29803e-10	29	sample10,sample33,sample1,sample65,sample51,sample47,sample69,sample54,sample32,sample46,sample31,sample3,sample48,sample62,sample49,sample17,sample30,sample58,sample28,sample74,sample59,sample72,sample64,sample9,sample63,sample61,sample6,sample37,sample36
chr16	74900911	74903429	2.01679	0.620165	3.25203	2.48361e-11	5.35898e-10	18	sample1,sample65,sample51,sample47,sample69,sample31,sample48,sample17,sample68,sample30,sample76,sample28,sample56,sample72,sample64,sample63,sample6,sample36
chr7	98180427	98187719	2.08977	0.39363	5.30897	2.49885e-11	5.37979e-10	29	sample43,sample10,sample1,sample65,sample51,sample47,sample46,sample31,sample75,sample62,sample17,sample76,sample74,sample56,sample72,sample64,sample44,sample29,sample35,sample40,sample50,sample63,sample73,sample53,sample77,sample66,sample61,sample6,sample36
chr13	74001413	74004735	2.11993	0.300888	7.04559	2.51051e-11	5.40187e-10	24	sample10,sample5,sample33,sample1,sample51,sample47,sample69,sample54,sample31,sample48,sample34,sample76,sample58,sample56,sample64,sample29,sample35,sample18,sample40,sample50,sample9,sample63,sample77,sample36
chr1	119384236	119386213	1.73721	0.337534	5.14678	2.51517e-11	5.40888e-10	14	sample1,sample65,sample47,sample69,sample54,sample49,sample64,sample35,sample40,sample63,sample66,sample61,sample6,sample36
chr8	22215454	22218939	1.56565	0.565482	2.76871	2.55604e-11	5.48146e-10	17	sample5,sample2,sample69,sample31,sample48,sample62,sample17,sample68,sample59,sample56,sample64,sample50,sample9,sample53,sample77,sample6,sample36
chrX	16789979	16791102	3.07198	0.975233	3.15	2.57341e-11	5.51564e-10	25	sample1,sample2,sample65,sample51,sample47,sample69,sample31,sample75,sample62,sample49,sample17,sample76,sample58,sample56,sample64,sample44,sample35,sample40,sample50,sample63,sample73,sample77,sample6,sample37,sample36
chr19	45600159	45609486	3.97728	1.89299	2.10106	2.58515e-11	5.53772e-10	46	sample43,sample10,sample5,sample42,sample33,sample1,sample55,sample65,sample51,sample69,sample54,sample32,sample46,sample31,sample48,sample75,sample39,sample7,sample62,sample49,sample17,sample34,sample30,sample76,sample58,sample74,sample57,sample70,sample59,sample56,sample72,sample64,sample29,sample35,sample18,sample40,sample50,sample9,sample63,sample53,sample77,sample66,sample60,sample61,sample6…
chr6	1263269	1264674	2.07385	0.331055	6.26436	2.5923e-11	5.54377e-10	15	sample1,sample65,sample49,sample17,sample72,sample64,sample44,sample35,sample18,sample40,sample9,sample77,sample66,sample37,sample36
chr7	2902292	2904455	4.86685	2.73865	1.77709	2.6174e-11	5.58815e-10	25	sample80,sample42,sample33,sample55,sample2,sample51,sample47,sample75,sample39,sample17,sample34,sample76,sample58,sample26,sample74,sample16,sample29,sample35,sample18,sample9,sample53,sample77,sample6,sample37,sample36
chr5	14727775	14729984	2.45486	1.01962	2.40761	2.6441e-11	5.63578e-10	24	sample43,sample5,sample1,sample65,sample69,sample48,sample62,sample49,sample17,sample76,sample58,sample74,sample56,sample72,sample64,sample40,sample50,sample9,sample63,sample73,sample53,sample61,sample6,sample36
chr1	212090864	212093779	1.82706	0.859166	2.12655	2.6628e-11	5.66622e-10	15	sample33,sample2,sample51,sample47,sample46,sample48,sample58,sample64,sample44,sample29,sample40,sample9,sample77,sample6,sample36
chr4	154063324	154065797	2.10957	0.965057	2.18596	2.70483e-11	5.74929e-10	21	sample42,sample1,sample51,sample47,sample69,sample31,sample48,sample62,sample49,sample76,sample58,sample59,sample64,sample35,sample40,sample9,sample63,sample73,sample61,sample6,sample36
chr11	12712568	12720104	4.55743	2.75158	1.6563	2.72584e-11	5.78438e-10	31	sample67,sample33,sample1,sample55,sample51,sample47,sample69,sample54,sample31,sample48,sample62,sample49,sample76,sample58,sample28,sample26,sample59,sample56,sample72,sample64,sample35,sample18,sample40,sample50,sample9,sample63,sample73,sample53,sample77,sample66,sample36
chr1	157208760	157211542	1.8281	0.475765	3.84245	2.72959e-11	5.78914e-10	17	sample1,sample65,sample51,sample69,sample31,sample62,sample49,sample17,sample30,sample58,sample64,sample40,sample9,sample77,sample61,sample6,sample37
chr17	72188440	72190990	2.39127	0.879761	2.71809	2.73024e-11	5.78733e-10	23	sample1,sample4,sample65,sample51,sample47,sample69,sample46,sample62,sample49,sample17,sample58,sample72,sample64,sample44,sample35,sample18,sample40,sample50,sample63,sample77,sample61,sample6,sample36
chr16	87904801	87907614	3.64443	0.896632	4.06457	2.73463e-11	5.79344e-10	18	sample43,sample10,sample27,sample5,sample65,sample23,sample51,sample69,sample46,sample75,sample30,sample74,sample72,sample73,sample53,sample38,sample61,sample37
chr2	158006388	158009680	1.94226	0.57363	3.38591	2.73727e-11	5.79584e-10	21	sample5,sample33,sample1,sample2,sample47,sample69,sample31,sample48,sample62,sample17,sample58,sample59,sample64,sample35,sample50,sample63,sample77,sample66,sample61,sample6,sample36
chr7	116409397	116421890	2.86863	1.14607	2.50302	2.74353e-11	5.8059e-10	44	sample10,sample5,sample45,sample33,sample1,sample4,sample2,sample65,sample51,sample47,sample69,sample54,sample32,sample46,sample31,sample48,sample62,sample49,sample17,sample68,sample30,sample76,sample58,sample28,sample74,sample59,sample56,sample72,sample64,sample44,sample29,sample35,sample18,sample40,sample9,sample63,sample73,sample53,sample77,sample66,sample61,sample6,sample37,sample36
chr9	139775470	139778456	5.43209	3.06139	1.77439	2.77701e-11	5.86708e-10	28	sample43,sample5,sample45,sample55,sample4,sample2,sample47,sample48,sample75,sample39,sample7,sample62,sample17,sample68,sample34,sample76,sample58,sample26,sample74,sample59,sample64,sample35,sample18,sample9,sample73,sample53,sample77,sample60
chr8	102516076	102518793	2.78831	1.05539	2.64196	2.81305e-11	5.92695e-10	26	sample33,sample1,sample55,sample65,sample23,sample51,sample47,sample69,sample54,sample31,sample48,sample62,sample49,sample17,sample30,sample76,sample72,sample64,sample44,sample35,sample18,sample9,sample66,sample61,sample6,sample36
chr2	11492401	11499798	1.85058	0.826298	2.2396	2.84126e-11	5.97658e-10	26	sample5,sample1,sample51,sample47,sample69,sample54,sample31,sample48,sample75,sample62,sample49,sample17,sample68,sample30,sample76,sample59,sample72,sample64,sample35,sample40,sample50,sample9,sample63,sample73,sample6,sample36
chr6	30754906	30757231	2.67304	1.38041	1.93641	2.84923e-11	5.99008e-10	22	sample10,sample75,sample39,sample49,sample17,sample34,sample76,sample58,sample56,sample16,sample64,sample35,sample40,sample50,sample63,sample53,sample77,sample66,sample60,sample61,sample6,sample36
chr1	228414881	228416479	1.96841	1.04812	1.87804	2.85274e-11	5.99418e-10	15	sample5,sample51,sample69,sample48,sample75,sample49,sample76,sample56,sample72,sample64,sample40,sample50,sample63,sample77,sample6
chr18	76915804	76917376	2.93476	1.78597	1.64323	2.85488e-11	5.99214e-10	16	sample5,sample45,sample51,sample47,sample31,sample48,sample75,sample17,sample68,sample76,sample64,sample18,sample50,sample9,sample77,sample36
chr20	49377123	49380903	4.14642	1.66406	2.49176	2.86934e-11	6.01265e-10	37	sample5,sample45,sample33,sample1,sample55,sample4,sample65,sample51,sample47,sample69,sample54,sample31,sample48,sample75,sample62,sample49,sample17,sample68,sample30,sample76,sample74,sample59,sample64,sample44,sample35,sample18,sample40,sample9,sample63,sample73,sample53,sample77,sample66,sample61,sample6,sample37,sample36
chr8	124729756	124733133	3.38843	1.3547	2.50124	2.87005e-11	6.01087e-10	34	sample5,sample1,sample65,sample23,sample51,sample47,sample69,sample54,sample32,sample31,sample48,sample62,sample49,sample17,sample30,sample76,sample58,sample28,sample74,sample72,sample64,sample44,sample35,sample40,sample50,sample9,sample63,sample73,sample77,sample66,sample61,sample6,sample37,sample36
chr20	30913145	30915023	3.56757	1.64951	2.1628	2.95735e-11	6.18362e-10	32	sample5,sample33,sample1,sample55,sample51,sample47,sample69,sample32,sample31,sample62,sample49,sample17,sample68,sample30,sample76,sample59,sample56,sample64,sample44,sample35,sample40,sample50,sample9,sample63,sample73,sample53,sample77,sample66,sample61,sample6,sample37,sample36
chr4	148258845	148264254	1.71492	0.555841	3.08526	2.96241e-11	6.19083e-10	21	sample10,sample1,sample65,sample54,sample31,sample49,sample17,sample30,sample58,sample70,sample59,sample56,sample72,sample35,sample40,sample50,sample9,sample63,sample61,sample37,sample36
chr7	75993287	75995270	4.56897	2.58274	1.76904	2.97547e-11	6.21138e-10	26	sample10,sample5,sample1,sample51,sample47,sample69,sample32,sample3,sample48,sample75,sample39,sample62,sample17,sample34,sample76,sample58,sample28,sample74,sample59,sample44,sample35,sample73,sample53,sample77,sample66,sample36
chr11	10757033	10758498	2.62978	1.51166	1.73966	3.00937e-11	6.27193e-10	15	sample33,sample1,sample2,sample51,sample47,sample69,sample54,sample48,sample75,sample49,sample34,sample58,sample29,sample77,sample36
chr8	37475609	37484230	4.12413	1.96597	2.09775	3.04063e-11	6.33022e-10	51	sample43,sample10,sample27,sample5,sample42,sample45,sample1,sample55,sample4,sample65,sample51,sample47,sample69,sample54,sample32,sample31,sample3,sample48,sample75,sample62,sample49,sample17,sample68,sample34,sample30,sample76,sample58,sample28,sample26,sample74,sample70,sample59,sample56,sample72,sample64,sample44,sample29,sample35,sample18,sample40,sample50,sample9,sample63,sample73,sample53…
chr20	44249993	44250948	2.53714	0.813326	3.11946	3.07974e-11	6.39436e-10	21	sample1,sample47,sample69,sample32,sample31,sample48,sample62,sample49,sample17,sample68,sample58,sample72,sample64,sample44,sample35,sample40,sample50,sample63,sample6,sample37,sample36
chr18	3611264	3618607	2.22447	1.06682	2.08513	3.08015e-11	6.39176e-10	40	sample43,sample5,sample33,sample1,sample55,sample51,sample47,sample69,sample54,sample32,sample31,sample3,sample48,sample75,sample62,sample49,sample68,sample34,sample79,sample30,sample76,sample28,sample74,sample70,sample59,sample72,sample64,sample44,sample35,sample18,sample40,sample50,sample9,sample63,sample73,sample77,sample66,sample61,sample37,sample36
chr12	14144572	14147063	2.09848	0.524942	3.99754	3.0921e-11	6.40965e-10	20	sample1,sample2,sample65,sample51,sample69,sample46,sample31,sample48,sample62,sample49,sample17,sample76,sample59,sample64,sample35,sample9,sample63,sample73,sample6,sample36
chr16	2698943	2705391	2.6917	0.899119	2.9937	3.093e-11	6.40806e-10	40	sample43,sample10,sample5,sample33,sample1,sample55,sample65,sample51,sample47,sample69,sample32,sample31,sample48,sample75,sample7,sample62,sample17,sample30,sample58,sample74,sample70,sample59,sample56,sample72,sample64,sample44,sample35,sample40,sample50,sample9,sample63,sample73,sample53,sample77,sample66,sample60,sample61,sample6,sample37,sample36
chr1	225605461	225608270	1.91513	0.991206	1.93212	3.1229e-11	6.46307e-10	18	sample1,sample65,sample51,sample69,sample31,sample48,sample62,sample49,sample17,sample30,sample58,sample59,sample40,sample73,sample66,sample6,sample37,sample36
chr8	102159681	102163722	4.88578	2.32186	2.10425	3.13545e-11	6.48206e-10	37	sample5,sample42,sample45,sample33,sample1,sample55,sample23,sample51,sample47,sample69,sample54,sample31,sample75,sample62,sample49,sample17,sample34,sample76,sample58,sample28,sample26,sample70,sample59,sample56,sample72,sample64,sample44,sample35,sample40,sample9,sample73,sample77,sample38,sample66,sample6,sample37,sample36
chr17	70972686	70974916	2.81366	1.0083	2.7905	3.1919e-11	6.58814e-10	27	sample10,sample33,sample1,sample4,sample2,sample51,sample47,sample46,sample31,sample7,sample62,sample49,sample17,sample34,sample30,sample76,sample64,sample44,sample29,sample35,sample18,sample50,sample9,sample73,sample77,sample6,sample36
chr3	171492105	171495664	1.88211	0.764251	2.46268	3.25581e-11	6.69851e-10	23	sample10,sample1,sample4,sample65,sample51,sample47,sample54,sample32,sample31,sample75,sample17,sample34,sample30,sample58,sample70,sample59,sample64,sample29,sample35,sample9,sample77,sample66,sample37
chr5	600134	605002	1.84806	0.421182	4.38779	3.25894e-11	6.70136e-10	28	sample1,sample55,sample51,sample47,sample69,sample31,sample3,sample48,sample75,sample49,sample17,sample68,sample34,sample30,sample58,sample70,sample59,sample56,sample72,sample64,sample40,sample50,sample9,sample73,sample66,sample61,sample6,sample36
chr2	169397432	169403320	2.51547	1.02017	2.46573	3.27401e-11	6.72877e-10	39	sample5,sample1,sample4,sample2,sample65,sample51,sample47,sample69,sample54,sample32,sample46,sample31,sample48,sample75,sample62,sample49,sample17,sample68,sample34,sample76,sample58,sample74,sample70,sample59,sample72,sample64,sample44,sample29,sample35,sample40,sample9,sample63,sample73,sample53,sample77,sample66,sample6,sample37,sample36
chr7	32707118	32711225	4.62449	2.13213	2.16895	3.27802e-11	6.72982e-10	38	sample10,sample5,sample45,sample67,sample33,sample1,sample55,sample4,sample51,sample47,sample69,sample54,sample31,sample75,sample62,sample17,sample68,sample30,sample58,sample28,sample74,sample70,sample59,sample56,sample72,sample64,sample44,sample29,sample35,sample40,sample9,sample73,sample53,sample77,sample66,sample6,sample37,sample36
chr3	193847300	193850960	4.49461	2.30643	1.94873	3.28314e-11	6.73315e-10	29	sample43,sample10,sample33,sample1,sample55,sample4,sample51,sample69,sample54,sample32,sample75,sample62,sample17,sample34,sample30,sample58,sample28,sample74,sample59,sample72,sample64,sample35,sample40,sample50,sample63,sample77,sample6,sample37,sample36
chr1	92291306	92297617	3.0817	1.45681	2.11537	3.29238e-11	6.74849e-10	35	sample43,sample27,sample33,sample1,sample55,sample2,sample65,sample23,sample51,sample47,sample69,sample54,sample46,sample31,sample48,sample75,sample62,sample49,sample17,sample30,sample76,sample58,sample28,sample74,sample64,sample44,sample35,sample40,sample50,sample9,sample73,sample53,sample77,sample66,sample36
chr6	13287927	13291586	1.69149	0.723214	2.33885	3.31438e-11	6.77916e-10	19	sample65,sample69,sample32,sample31,sample62,sample49,sample17,sample58,sample74,sample64,sample44,sample40,sample63,sample73,sample53,sample77,sample66,sample6,sample36
chr3	172408891	172410970	3.30506	1.76502	1.87254	3.31643e-11	6.77975e-10	28	sample10,sample33,sample4,sample51,sample47,sample69,sample54,sample31,sample48,sample75,sample62,sample49,sample68,sample58,sample28,sample74,sample70,sample59,sample56,sample72,sample64,sample35,sample9,sample73,sample53,sample61,sample6,sample37
chr15	31696989	31699057	2.09739	0.880917	2.38092	3.32984e-11	6.79634e-10	15	sample65,sample51,sample47,sample69,sample31,sample49,sample58,sample64,sample29,sample35,sample40,sample9,sample77,sample66,sample36
chr6	37169734	37173736	2.68486	1.34299	1.99917	3.3308e-11	6.79469e-10	31	sample5,sample42,sample33,sample1,sample55,sample65,sample51,sample47,sample69,sample31,sample3,sample48,sample49,sample17,sample68,sample30,sample76,sample58,sample74,sample72,sample64,sample44,sample40,sample9,sample63,sample53,sample77,sample66,sample6,sample37,sample36
chr1	183400521	183402587	2.15323	0.657585	3.27445	3.42044e-11	6.95912e-10	20	sample33,sample1,sample51,sample47,sample46,sample31,sample48,sample75,sample76,sample64,sample44,sample29,sample35,sample40,sample50,sample9,sample63,sample77,sample6,sample36
chr13	73736143	73739212	2.6365	0.755244	3.49093	3.42913e-11	6.97311e-10	24	sample33,sample1,sample65,sample51,sample47,sample69,sample49,sample17,sample58,sample70,sample59,sample56,sample72,sample64,sample44,sample35,sample40,sample50,sample9,sample63,sample77,sample66,sample6,sample36
chr4	8127805	8130892	3.0113	0.535373	5.62468	3.43592e-11	6.97955e-10	34	sample10,sample1,sample51,sample47,sample69,sample54,sample32,sample46,sample31,sample62,sample49,sample17,sample30,sample58,sample28,sample26,sample74,sample70,sample59,sample56,sample72,sample64,sample29,sample35,sample18,sample40,sample50,sample9,sample63,sample53,sample77,sample66,sample61,sample36
chr7	34691494	34696105	3.12236	0.452365	6.90231	3.45796e-11	7.0169e-10	32	sample43,sample10,sample42,sample33,sample1,sample55,sample2,sample51,sample47,sample69,sample46,sample31,sample75,sample7,sample49,sample30,sample76,sample28,sample74,sample70,sample56,sample72,sample64,sample29,sample18,sample40,sample9,sample63,sample77,sample66,sample37,sample36
chr14	62013758	62015349	2.2545	0.990563	2.27598	3.47096e-11	7.03587e-10	18	sample10,sample5,sample1,sample47,sample31,sample48,sample75,sample39,sample7,sample34,sample30,sample76,sample58,sample35,sample53,sample77,sample60,sample36
chr20	56249586	56286959	4.2068	1.79402	2.34491	3.47374e-11	7.03781e-10	53	sample10,sample27,sample8,sample5,sample42,sample45,sample33,sample1,sample55,sample4,sample2,sample65,sample51,sample47,sample69,sample54,sample32,sample31,sample3,sample75,sample39,sample7,sample62,sample49,sample17,sample68,sample34,sample30,sample76,sample58,sample28,sample74,sample59,sample56,sample72,sample64,sample44,sample29,sample35,sample18,sample40,sample50,sample9,sample63,sample73,sa…
chr2	200842203	200844695	1.89968	0.862493	2.20254	3.48223e-11	7.05129e-10	15	sample33,sample2,sample47,sample69,sample31,sample48,sample62,sample49,sample64,sample35,sample9,sample63,sample77,sample6,sample36
chr10	105875950	105878881	2.20777	0.491064	4.49588	3.50977e-11	7.08841e-10	19	sample10,sample33,sample1,sample2,sample51,sample47,sample31,sample49,sample17,sample34,sample30,sample28,sample70,sample59,sample29,sample35,sample63,sample66,sample36
chr7	36799307	36803507	2.24112	0.601755	3.72431	3.57069e-11	7.19258e-10	34	sample43,sample10,sample42,sample33,sample1,sample55,sample2,sample51,sample47,sample32,sample31,sample48,sample75,sample62,sample49,sample17,sample68,sample30,sample76,sample58,sample56,sample72,sample64,sample35,sample40,sample50,sample9,sample63,sample53,sample77,sample66,sample61,sample6,sample36
chr12	29193327	29195733	2.55631	1.14807	2.22661	3.59229e-11	7.23231e-10	29	sample5,sample33,sample1,sample4,sample2,sample51,sample47,sample32,sample31,sample48,sample62,sample49,sample17,sample68,sample30,sample76,sample58,sample28,sample59,sample64,sample44,sample35,sample9,sample63,sample73,sample77,sample66,sample6,sample36
chr21	37801266	37804753	1.81336	0.583639	3.10698	3.59333e-11	7.23061e-10	22	sample10,sample5,sample33,sample55,sample2,sample31,sample48,sample75,sample39,sample7,sample17,sample34,sample76,sample58,sample74,sample44,sample29,sample18,sample50,sample77,sample60,sample36
chr3	138579626	138583931	6.11467	3.61645	1.69079	3.61841e-11	7.27348e-10	27	sample10,sample45,sample33,sample1,sample55,sample4,sample51,sample47,sample69,sample32,sample75,sample62,sample34,sample28,sample26,sample74,sample59,sample72,sample64,sample35,sample9,sample73,sample77,sample66,sample6,sample37,sample36
chr7	73693438	73695791	4.20645	2.56684	1.63877	3.6334e-11	7.296e-10	22	sample33,sample1,sample65,sample51,sample47,sample3,sample48,sample75,sample62,sample17,sample76,sample26,sample74,sample59,sample44,sample35,sample18,sample50,sample77,sample66,sample60,sample36
chrX	41240026	41244889	4.16304	1.98591	2.09628	3.64165e-11	7.30493e-10	32	sample5,sample45,sample1,sample55,sample2,sample47,sample69,sample32,sample31,sample75,sample7,sample62,sample49,sample17,sample76,sample58,sample28,sample74,sample59,sample56,sample72,sample64,sample44,sample35,sample40,sample9,sample73,sample53,sample77,sample6,sample37,sample36
chr20	56323019	56324702	3.39377	1.53468	2.21139	3.65423e-11	7.32254e-10	23	sample5,sample67,sample1,sample65,sample75,sample7,sample17,sample76,sample74,sample56,sample72,sample16,sample64,sample44,sample18,sample40,sample63,sample53,sample77,sample60,sample61,sample6,sample36
chr8	52885152	52887192	2.78563	0.686945	4.0551	3.71913e-11	7.42552e-10	31	sample5,sample1,sample2,sample65,sample51,sample47,sample69,sample54,sample31,sample75,sample62,sample49,sample17,sample30,sample76,sample58,sample72,sample64,sample44,sample35,sample40,sample50,sample9,sample63,sample53,sample77,sample66,sample61,sample6,sample37,sample36
chr9	37962523	37970654	6.23969	3.51043	1.77747	3.73717e-11	7.45382e-10	34	sample5,sample45,sample67,sample33,sample1,sample55,sample4,sample23,sample51,sample47,sample69,sample32,sample31,sample3,sample75,sample62,sample17,sample34,sample58,sample28,sample26,sample74,sample70,sample59,sample72,sample64,sample40,sample9,sample73,sample53,sample77,sample66,sample6,sample37
chr11	64332484	64335792	2.25876	0.83496	2.70524	3.75042e-11	7.47637e-10	31	sample5,sample1,sample55,sample65,sample47,sample69,sample32,sample31,sample48,sample75,sample62,sample49,sample17,sample68,sample30,sample76,sample58,sample26,sample59,sample56,sample72,sample64,sample44,sample35,sample40,sample50,sample63,sample73,sample66,sample61,sample36
chr3	188012264	188015207	3.35453	2.03818	1.64585	3.76803e-11	7.5037e-10	24	sample67,sample1,sample4,sample2,sample51,sample47,sample69,sample46,sample31,sample75,sample49,sample17,sample34,sample30,sample58,sample28,sample64,sample44,sample29,sample35,sample40,sample50,sample63,sample77
chr3	40805612	40807850	2.27405	1.09397	2.07871	3.81894e-11	7.58156e-10	21	sample65,sample51,sample47,sample69,sample32,sample46,sample31,sample49,sample17,sample30,sample58,sample59,sample64,sample44,sample35,sample40,sample50,sample73,sample61,sample37,sample36
chr1	92907134	92907921	2.41707	1.12759	2.14357	3.83607e-11	7.61163e-10	14	sample33,sample2,sample51,sample47,sample69,sample75,sample79,sample64,sample29,sample9,sample77,sample66,sample6,sample36
chr6	43733438	43736437	5.60623	2.52421	2.22099	3.84053e-11	7.61264e-10	25	sample10,sample5,sample42,sample1,sample55,sample51,sample32,sample46,sample75,sample49,sample58,sample28,sample26,sample59,sample56,sample72,sample64,sample35,sample40,sample50,sample63,sample53,sample77,sample6,sample37
chr16	1769599	1773614	3.47245	2.1959	1.58133	3.89116e-11	7.70505e-10	23	sample10,sample45,sample33,sample55,sample2,sample51,sample47,sample32,sample31,sample48,sample75,sample34,sample58,sample28,sample26,sample59,sample72,sample9,sample63,sample73,sample77,sample66,sample36
chr2	60438460	60443956	3.41685	1.57037	2.17582	3.90146e-11	7.72148e-10	37	sample10,sample5,sample45,sample1,sample55,sample65,sample51,sample47,sample69,sample54,sample32,sample31,sample75,sample62,sample49,sample17,sample58,sample28,sample74,sample70,sample59,sample56,sample72,sample64,sample35,sample40,sample50,sample9,sample63,sample73,sample53,sample77,sample66,sample61,sample6,sample37,sample36
chr2	120973248	120974604	2.06772	0.413778	4.99716	3.90523e-11	7.72498e-10	19	sample10,sample1,sample51,sample47,sample69,sample54,sample49,sample17,sample58,sample59,sample56,sample64,sample18,sample50,sample9,sample73,sample77,sample66,sample6
chr6	41503692	41507351	3.97832	2.05008	1.94057	3.90832e-11	7.72712e-10	28	sample10,sample5,sample67,sample51,sample47,sample69,sample32,sample31,sample75,sample62,sample49,sample30,sample28,sample74,sample59,sample72,sample64,sample35,sample40,sample9,sample63,sample73,sample53,sample66,sample61,sample6,sample37,sample36
chr15	89630954	89639017	4.6215	3.08661	1.49727	3.96008e-11	7.8174e-10	37	sample80,sample43,sample10,sample27,sample42,sample33,sample1,sample2,sample65,sample51,sample47,sample69,sample54,sample32,sample46,sample31,sample48,sample75,sample68,sample34,sample30,sample58,sample28,sample70,sample59,sample56,sample64,sample44,sample35,sample18,sample40,sample9,sample53,sample77,sample66,sample6,sample36
chr11	349457	356419	6.23957	3.79292	1.64506	3.97023e-11	7.82942e-10	33	sample80,sample43,sample27,sample42,sample33,sample1,sample55,sample52,sample2,sample23,sample51,sample75,sample62,sample17,sample68,sample34,sample76,sample28,sample26,sample59,sample56,sample72,sample64,sample44,sample35,sample40,sample63,sample73,sample53,sample77,sample66,sample37,sample36
chr7	128082007	128086932	4.13398	1.6279	2.53945	3.97546e-11	7.8317e-10	37	sample10,sample5,sample45,sample1,sample55,sample65,sample51,sample47,sample69,sample54,sample32,sample31,sample3,sample48,sample75,sample62,sample49,sample17,sample68,sample76,sample28,sample74,sample59,sample72,sample64,sample44,sample35,sample40,sample50,sample9,sample63,sample73,sample53,sample66,sample6,sample37,sample36
chr1	211714525	211717053	2.14882	0.799689	2.68707	3.99891e-11	7.86983e-10	14	sample10,sample1,sample65,sample47,sample69,sample46,sample48,sample62,sample17,sample35,sample18,sample63,sample73,sample36
chr19	48857150	48859207	1.97002	0.506211	3.8917	4.02712e-11	7.91726e-10	15	sample5,sample33,sample1,sample2,sample51,sample47,sample48,sample62,sample17,sample58,sample44,sample29,sample18,sample40,sample9
chr8	128382545	128384361	2.69162	0.381193	7.06103	4.03603e-11	7.93073e-10	23	sample10,sample5,sample1,sample51,sample47,sample69,sample31,sample75,sample62,sample49,sample30,sample76,sample64,sample35,sample40,sample50,sample9,sample63,sample73,sample66,sample61,sample37,sample36
chr9	115098128	115101786	2.45744	1.26609	1.94096	4.05237e-11	7.95471e-10	32	sample5,sample33,sample1,sample4,sample2,sample65,sample51,sample47,sample69,sample32,sample31,sample48,sample75,sample62,sample49,sample17,sample30,sample58,sample74,sample59,sample72,sample64,sample44,sample35,sample9,sample73,sample53,sample77,sample66,sample6,sample37,sample36
[truncated: 4,436 more rows]

## Sheet: Tab4 Significant LOST VELs info
Table 4 Information of significant LOST variant enhancer loci in CRC
Significant LOST VELs information							The H3K27ac signal was normalized by RPM
[truncated: 1,101 more rows]

## Sheet: Tab5 VEL number of samples
Table 5 The number of identified VELs in each CRC sample
[truncated: 71 more rows]

[truncated: 3 more sheets: Tab6 Significant GAIN VSEL info, Tab7 Significant LOST VSEL info, Tab8 Primers, siRNAs and sgRNAs]
